# Supplementary material for: Controlling thiyl radical polymerization via in situ desulfurization
Source: Royal Society of Chemistry journal article supplement (doi:10.1039/d4py01140f), 2024-11-22
Supplement: d4py01140f1.pdf [file d4py01140f1.pdf]

## Supporting Information

### Controlling thiyl radical polymerization via *in situ* desulfurization

Huajuan Hu,<sup>a,b</sup> Ping Yi,<sup>a,b</sup> Jiayang He,<sup>b</sup> Derong Cao,<sup>\*,a</sup> and Hanchu Huang<sup>\*,b</sup>

<sup>a</sup>*State Key Laboratory of Luminescent Materials and Devices, School of Chemistry and Chemical Engineering, South China University of Technology, Guangzhou 510640, China*

<sup>b</sup>*School of Materials Science and Engineering, Key Laboratory for Polymeric Composite and Functional Materials of Ministry of Education, Sun Yat-sen University, Guangzhou 510006, China*

**\*Corresponding Email addresses:** huanghch9@mail.sysu.edu.cn; drcao@scut.edu.cn

## Table of Contents

|                                                                                                                                   |     |
|-----------------------------------------------------------------------------------------------------------------------------------|-----|
| <b>Scheme S1.</b> Synthesis of trigger-testing compounds.....                                                                     | S4  |
| <b>Scheme S2.</b> General procedure for the synthesis of monomers.....                                                            | S6  |
| <b>Scheme S3.</b> General procedure for controlled radical polymerization.....                                                    | S8  |
| <b>Scheme S4.</b> Effect of RAFT reagent on the polymerization of monomer <b>1</b> .....                                          | S10 |
| <b>Figure S1.</b> SEC traces showed that the RAFT reagent could not directly control the polymerization of monomer <b>1</b> ..... | S10 |
| <b>Table S1.</b> Effect of different CTAs on the polymerization of monomer <b>1</b> .....                                         | S11 |
| <b>Figure S2.</b> SEC traces for the polymerization of monomer <b>1</b> in the presence of different CTAs.....                    | S11 |
| <b>Table S2.</b> Effect of different amounts of P(OEt) <sub>3</sub> on the polymerization of monomer <b>1</b> .....               | S12 |
| <b>Figure S3.</b> SEC traces for the polymerization of monomer <b>1</b> at different amounts of P(OEt) <sub>3</sub> .....         | S12 |
| <b>Table S3.</b> Effect of different trivalent phosphorus on the polymerization of monomer <b>1</b> .....                         | S13 |
| <b>Figure S4.</b> SEC traces for the polymerization of monomer <b>1</b> with different trivalent phosphorus.....                  | S13 |
| <b>Table S4.</b> Effect of different reaction time on the polymerization of monomer <b>1</b> .....                                | S14 |
| <b>Figure S5.</b> SEC traces for the polymerization of monomer <b>1</b> at different reaction time.....                           | S14 |
| <b>Table S5.</b> Effect of different solvents on the polymerization of monomer <b>1</b> .....                                     | S15 |
| <b>Figure S6.</b> SEC traces for the polymerization of monomer <b>1</b> in different solvents.....                                | S15 |
| <b>Table S6.</b> Effect of different concentrations on the polymerization of monomer <b>1</b> .....                               | S16 |
| <b>Figure S7.</b> SEC traces for the polymerization of monomer <b>1</b> at different concentrations.....                          | S16 |
| <b>Table S7.</b> Effect of different amount of AIBN on the polymerization of monomer <b>1</b> .....                               | S17 |
| <b>Figure S8.</b> SEC traces for the polymerization of monomer <b>1</b> at different amount of AIBN.....                          | S17 |
| <b>Table S8.</b> Polymerization of monomer <b>1</b> at different monomer/CTA ratios.....                                          | S18 |
| <b>Figure S9.</b> SEC traces for the polymerization of monomer <b>1</b> at different monomer/CTA ratios.....                      | S18 |
| <b>Table S9.</b> Polymerization of monomer <b>2</b> at different monomer/CTA ratios.....                                          | S19 |
| <b>Figure S10.</b> SEC traces for the polymerization of monomer <b>2</b> at different monomer/CTA ratios.....                     | S19 |
| <b>Table S10.</b> Polymerization of monomer <b>3</b> at different monomer/CTA ratios.....                                         | S20 |
| <b>Figure S11.</b> SEC traces for the polymerization of monomer <b>3</b> at different monomer/CTA ratios.....                     | S20 |
| <b>Scheme S5.</b> Kinetic study of polymerization of monomer <b>1</b> .....                                                       | S21 |
| <b>Figure S12.</b> (A) Plot of $\ln([M]_0/[M]_t)$ versus time. (B) Plots of $M_n$ and $\bar{D}$ versus monomer conversion.....    | S21 |
| <b>Figure S13.</b> SEC traces for the kinetic study of the polymerization of monomer <b>1</b> .....                               | S21 |
| <b>Figure S14.</b> NMR traces for the kinetic study of the polymerization of monomer <b>1</b> .....                               | S22 |
| <b>Scheme S6.</b> Polymer synthesis for MALDI-TOF analysis.....                                                                   | S23 |
| <b>Figure S15.</b> MALDI-TOF analysis of polymer <b>P1</b> .....                                                                  | S23 |
| <b>Figure S16.</b> The zoom-in image of the 9-mers in the MALDI-TOF spectrum of polymer <b>P1</b> .....                           | S24 |
| <b>Figure S17.</b> Elemental analysis of polymer <b>P1</b> .....                                                                  | S24 |
| <b>Scheme S7.</b> Synthesis of diblock copolymer <b>P1-b-P2</b> .....                                                             | S25 |
| <b>Figure S18.</b> SEC traces for the synthesis of diblock copolymer <b>P1-b-P2</b> .....                                         | S25 |
| <b>Table S11.</b> Copolymerization of monomer <b>1</b> and vinyl monomers.....                                                    | S26 |
| <b>Figure S19.</b> SEC traces for copolymerization of monomer <b>1</b> and vinyl monomers.....                                    | S26 |
| <b>Figure S20.</b> <sup>1</sup> H NMR analysis of the vinyl copolymers.....                                                       | S27 |

|                                                                                       |     |
|---------------------------------------------------------------------------------------|-----|
| <b>Figure S21.</b> Proposed mechanism for the polymerization. ....                    | S28 |
| <b>Table S12.</b> Computed results for the chain-growth process. ....                 | S29 |
| <b>Figure S22.</b> Calculated free energy profiles for the chain-growth process. .... | S29 |
| <b>References</b> .....                                                               | S30 |
| <b>NMR spectra</b> .....                                                              | S31 |
| <b>Cartesian coordinates of all optimized structures</b> .....                        | S41 |

**Scheme S1.** Synthesis of trigger-testing compounds.

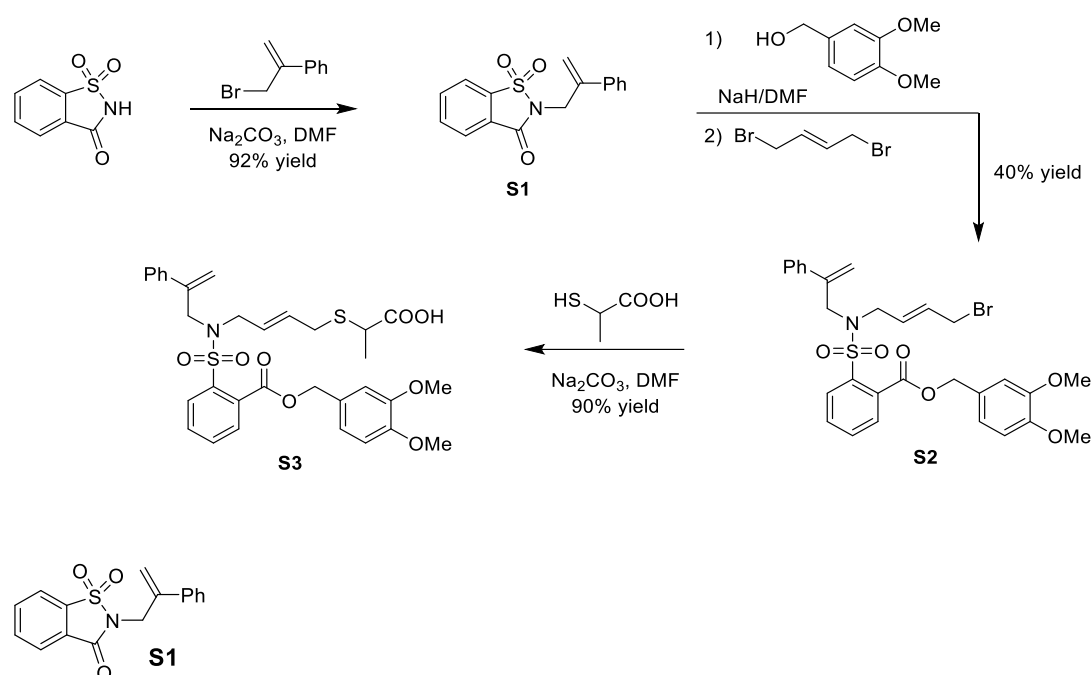

In a 250 mL flask, saccharin (10.99 g, 60 mmol) and (3-bromoprop-1-en-2-yl)benzene (17.74 g, 90 mmol) were dissolved in DMF (60 mL), then  $\text{Na}_2\text{CO}_3$  (6.36 g, 60 mmol) was added to the mixture, which was heated at 80 °C for 12 hours. The reaction mixture was then poured into water (250 mL) with vigorous stirring. The heterogeneous mixture was filtered to give a crude product, which was then purified by washing with petroleum ether to afford **S1** as a white solid (16.52 g, 92% yield, CAS: 1465901-24-9).  $^1\text{H}$  NMR (400 MHz,  $\text{CDCl}_3$ ):  $\delta$  8.04 (d,  $J = 7.6$  Hz, 1H), 7.89 (d,  $J = 7.0$  Hz, 1H), 7.87–7.76 (m, 2H), 7.52 (d,  $J = 7.4$  Hz, 2H), 7.39–7.27 (m, 3H), 5.47 (s, 1H), 4.83 (s, 2H).  $^{13}\text{C}$  NMR (100 MHz,  $\text{CDCl}_3$ ):  $\delta$  158.9, 141.4, 138.1, 138.0, 134.9, 134.4, 128.6, 128.3, 127.2, 126.5, 125.4, 121.1, 116.5, 42.8.

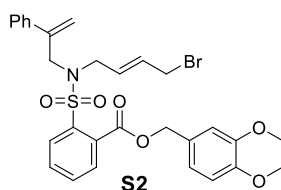

In a 250 mL flask, veratryl alcohol (5.55 g, 33 mmol) was dissolved in DMF (30 mL), the mixture was cooled at 0 °C, then NaH (1.58 g, 39.6 mmol) was dissolved in DMF (3 mL) and slowly added, the reaction was stirred for 30 min. Compound **S1** (9.88 g, 33 mmol) was then added to the mixture and stirred for 20 min at room temperature. The mixture was added dropwise to a DMF (10 mL) solution of *trans*-1,4-dibromo-2-butene (10.59 g, 49.5 mmol) and stirred for 40 min at room temperature. The reaction was poured into water (250 mL) and extracted with ethyl acetate (3×100 mL). The organic layer was washed with brine (3×100 mL), dried over  $\text{Na}_2\text{SO}_4$ , and concentrated *in vacuo*. The crude product was purified by flash column chromatography to afford **S2** as a yellowish oil (7.93 g, 40% yield, CAS: 2969136-30-7).  $^1\text{H}$  NMR (400 MHz,  $\text{CDCl}_3$ ):  $\delta$  7.71 (d,  $J = 8.0$  Hz, 1H), 7.59–7.53 (t,  $J = 7.5$  Hz, 1H), 7.50–7.44 (m, 2H), 7.37–7.32 (m, 2H), 7.30–7.25 (m, 3H), 7.04–

6.96 (m, 2H), 6.82 (d,  $J = 8.1$  Hz, 1H), 5.77–5.67 (m, 1H), 5.53 – 5.40 (m, 2H), 5.32 (s, 2H), 5.24 (s, 1H), 4.33 (s, 2H), 3.89–3.77 (m, 10H).  $^{13}\text{C}$  NMR (100 MHz,  $\text{CDCl}_3$ ):  $\delta$  168.0, 149.4, 149.2, 142.6, 138.6, 138.0, 133.2, 132.4, 130.8, 130.5, 129.5, 129.0, 128.6, 128.5, 128.2, 127.7, 126.6, 121.7, 116.5, 112.3, 111.0, 68.5, 56.1, 56.0, 50.5, 47.5, 31.5.

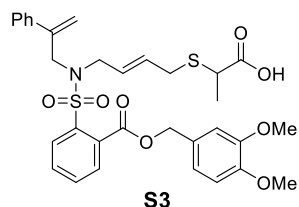

In a 250 mL flask, the reaction mixture of **S2** (6.61 g, 11 mmol), 2-mercaptopropionic acid (1.2 mL, 13.2 mmol), and  $\text{K}_2\text{CO}_3$  (1.82 g, 13.2 mmol) in DMF (50 mL) was stirred at room temperature for 24 h. After the reaction, the mixture was poured into water (200 mL) and extracted with ethyl acetate ( $3 \times 100$  mL). The organic layer was washed with brine ( $3 \times 100$  mL), dried over  $\text{Na}_2\text{SO}_4$ , and concentrated *in vacuo* to afford the **S3** as a yellowish oil (6.19 g, 90% yield, CAS: 2969136-36-3).  $^1\text{H}$  NMR (400 MHz,  $\text{CDCl}_3$ ):  $\delta$  7.73 (d,  $J = 7.6$  Hz, 1H), 7.55 (t,  $J = 7.5$  Hz, 1H), 7.51–7.44 (m, 2H), 7.37–7.31 (m, 2H), 7.29–7.25 (m, 3H), 7.04–6.95 (m, 2H), 6.81 (d,  $J = 8.2$  Hz, 1H), 5.56–5.47 (m, 1H), 5.43 (s, 1H), 5.39–5.28 (m, 3H), 5.23 (s, 1H), 4.39–4.26 (m, 2H), 3.90–3.80 (m, 8H), 3.28–3.18 (m, 2H), 3.12–3.03 (m, 1H), 1.37 (d,  $J = 7.2$  Hz, 3H).  $^{13}\text{C}$  NMR (100 MHz,  $\text{CDCl}_3$ ):  $\delta$  178.1, 168.2, 149.4, 149.1, 142.6, 138.6, 138.1, 133.1, 132.4, 130.4, 130.3, 129.0, 128.6, 128.5, 128.1, 127.8, 127.7, 126.5, 121.7, 116.2, 112.3, 111.0, 68.6, 56.1, 56.0, 50.2, 47.8, 39.7, 33.3, 16.7.

**Scheme S2.** General procedure for the synthesis of monomers.

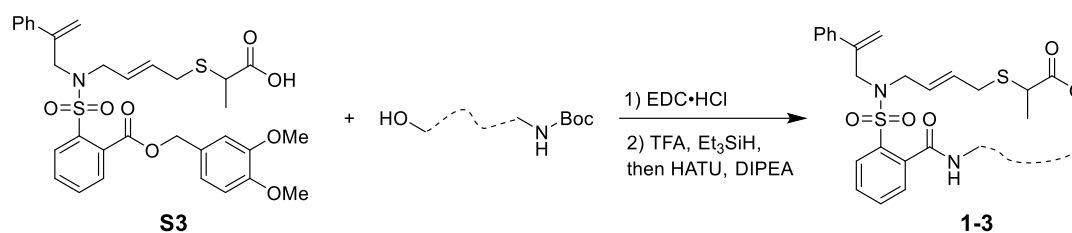

Following a slightly modified procedure,<sup>[1,2]</sup> in a 250 mL flask, **S3** (1.0 eq.) and *N*-Boc-protected amine alcohol (1.5 eq.) were dissolved in dry DCM (50 mL). To this solution were added *N*-ethyl-*N*-(3-dimethylaminopropyl)carbodiimide hydrochloride (EDC·HCl, 1.5 eq.) and 4-dimethylaminopyridine (DMAP, 0.05 eq.). After stirring at room temperature for 14 h, the reaction mixture was diluted with DCM (100 mL), washed with 1 M HCl (2×50 mL) and brine (50 mL), dried by Na<sub>2</sub>SO<sub>4</sub>, filtered, and concentrated *in vacuo* to afford a yellow oil, which was then directly subjected to the subsequent reaction. The yellow oil (1.0 eq.) was dissolved in DCM (50 mL). To this solution, triethylsilane (10 eq.) was added via a syringe, followed by the addition of trifluoroacetic acid (TFA, 13.0 eq.). After stirring at room temperature for 2 h, the reaction mixture was diluted with toluene (50 mL) and concentrated *in vacuo* to give the intermediated amino acid, which was directly dissolved in DMF (1500 mL). 1-[Bis(dimethylamino)methylene]-1*H*-1,2,3-triazolo[4,5-*b*]pyridinium 3-oxide hexafluorophosphate (HATU, 2.0 eq) was then added to the reaction mixture at room temperature. The mixture was stirred for 30 min, and diisopropylethylamine (DIPEA, 5.0 eq.) was slowly added. After stirring for an additional 36 h at room temperature, the reaction mixture was concentrated *in vacuo* and diluted with ethyl acetate (150 mL). The organic layer was washed with 1 M HCl (3×50 mL), 0.5 M NaOH (2×50 mL), and brine (50 mL) and dried over Na<sub>2</sub>SO<sub>4</sub>. The filtrate was concentrated and purified by column chromatography to afford the monomers.

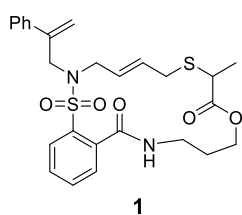

Following the general procedure, the reaction of **S3** (6.26 g, 10 mmol) and *tert*-Butyl (3-hydroxypropyl)carbamate (2.63 g, 15 mmol) afforded macrocyclic monomer **1** as a white solid (2.06 g, 40 % yield, CAS: 2969136-45-4). <sup>1</sup>H NMR (400 MHz, CDCl<sub>3</sub>): δ 7.84 (d, *J* = 7.5 Hz, 1H), 7.57 (t, *J* = 7.4 Hz, 1H), 7.48 (t, *J* = 7.0 Hz, 2H), 7.30–7.21 (m, 5H), 6.17 (t, *J* = 5.8 Hz, 1H), 5.53–5.42 (m, 1H), 5.39 (s, 1H), 5.36–5.27 (m, 1H), 5.20 (s, 1H), 4.38 – 4.20 (m, 3H), 4.18–4.10 (m, 1H), 3.99–3.90 (m, 1H), 3.74–3.57 (m, 2H), 3.48–3.34 (m, 2H), 3.22–3.13 (m, 1H), 3.06–2.97 (m, 1H), 2.01–1.85 (m, 2H), 1.40 (d, *J* = 7.2 Hz, 3H). <sup>13</sup>C NMR (100 MHz, CDCl<sub>3</sub>): δ 173.0, 168.3, 142.7, 138.6, 136.9, 136.8, 132.8, 130.0, 129.7, 129.6, 129.6, 128.6, 128.3, 128.2, 126.6, 116.9, 63.2, 52.6, 47.8, 40.9, 37.1, 33.0, 28.3, 17.3.

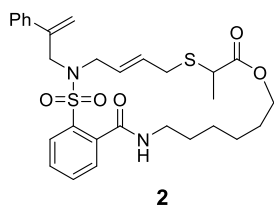

Following the general procedure, the reaction of **S3** (6.26 g, 10 mmol) and *tert*-Butyl (6-hydroxyhexyl)carbamate (3.26 g, 15 mmol) afforded macrocyclic monomer **2** as a white solid (2.62 g, 47% yield, CAS: 2969136-48-7). <sup>1</sup>H NMR (400 MHz, CDCl<sub>3</sub>): δ 7.68 (d, *J* = 7.9 Hz, 1H), 7.53 (t, *J* = 7.4 Hz, 1H), 7.44 (d, *J* = 7.4 Hz, 1H), 7.37 (t, *J* = 7.6 Hz, 1H), 7.26–7.21 (m, 5H), 5.91–5.81 (m, 1H), 5.67–5.49 (m, 2H), 5.36 (s, 1H), 5.18 (s, 1H), 4.32–4.22 (m, 2H), 4.21–4.14 (m, 1H), 4.13–4.06 (m, 1H), 3.95–3.87 (m, 1H), 3.82–3.75 (m, 1H), 3.55–3.45 (m, 1H), 3.41–3.23 (m, 3H), 3.12–3.04 (m, 1H), 1.77–1.45 (m, 8H), 1.39 (d, *J* = 7.2 Hz, 3H). <sup>13</sup>C NMR (100 MHz, CDCl<sub>3</sub>): δ 173.9, 168.6, 142.4, 138.8, 137.2, 136.9, 132.5, 130.5, 129.6, 129.3, 129.2, 129.1, 128.5, 128.1, 126.5, 116.7, 65.5, 50.7, 48.0, 39.7, 39.6, 33.5, 28.7, 28.4, 25.6, 25.5, 17.2.

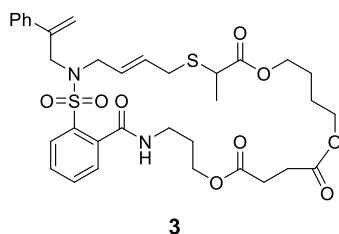

Following the general procedure, the reaction of **S3** (6.26 g, 10 mmol) and 3-((*tert*-butoxycarbonyl)amino)propyl (4-hydroxybutyl) succinate (5.21 g, 15 mmol) afforded macrocyclic monomer **3** as a yellowish oil (1.92 g, 28% yield, CAS: 2969136-54-5). <sup>1</sup>H NMR (400 MHz, CDCl<sub>3</sub>): δ 7.66 (d, *J* = 7.9 Hz, 1H), 7.55 (t, *J* = 7.4 Hz, 1H), 7.48 (d, *J* = 7.4 Hz, 1H), 7.39 (t, *J* = 7.7 Hz, 1H), 7.26–7.20 (m, 5H), 6.08 (t, *J* = 5.9 Hz, 1H), 5.59–5.44 (m, 2H), 5.40 (s, 1H), 5.24 (s, 1H), 4.35–4.24 (m, 2H), 4.23–4.11 (m, 6H), 3.81 (d, *J* = 5.6 Hz, 2H), 3.45 (q, *J* = 6.6 Hz, 2H), 3.31 (q, *J* = 7.1 Hz, 1H), 3.27–3.20 (m, 1H), 3.11–3.05 (m, 1H), 2.63 (s, 4H), 1.91 (p, *J* = 6.5 Hz, 2H), 1.77–1.69 (m, 4H), 1.36 (d, *J* = 7.1 Hz, 3H). <sup>13</sup>C NMR (100 MHz, CDCl<sub>3</sub>): δ 173.5, 172.3, 172.2, 168.2, 142.6, 138.8, 137.2, 136.6, 132.6, 130.5, 129.7, 129.5, 129.0, 128.6, 128.3, 128.2, 126.5, 116.9, 64.8, 64.4, 62.1, 50.2, 47.9, 39.7, 37.1, 33.4, 29.7, 29.6, 28.5, 25.4, 25.4, 17.0.

**Scheme S3.** General procedure for controlled radical polymerization.

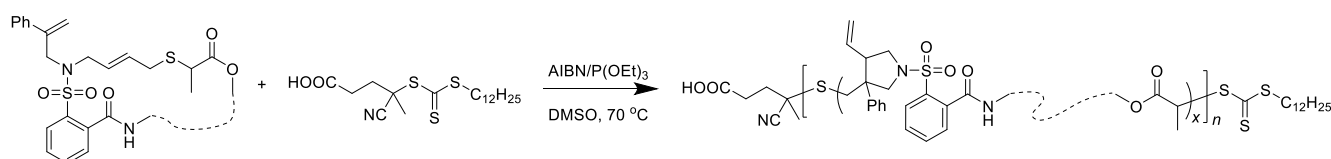

All polymerization reactions were performed under a nitrogen atmosphere using a standard Schlenk technique. The stock solution 4-cyano-4-((dodecylthio)carbonothioyl)thio)pentanoic acid (**CTA1**) and stock solution of AIBN were prepared in degassed DMSO at 0.04 M and 0.04 M, respectively. A typical procedure for the preparation of **P1** is given below as an example. A 10 mL Schlenk vial equipped with a stir bar was charged with macrocyclic monomer **1** (0.1 mmol), followed by the stock solution of **CTA1** (0.04 M, 125  $\mu$ L), AIBN (0.04 M, 125  $\mu$ L), triethyl phosphite (0.12 mmol) and DMSO (750  $\mu$ L). The vial was sealed. The solution was deoxygenated via three freeze-pump-thaw cycles, backfilled with nitrogen, and then heated at 70 °C for a given time. After the reaction, the vial was cooled by the ice bath and opened to air to stop the polymerization. The reaction mixture was diluted with a minimum amount of DCM and precipitated in diethyl ether. The obtained solid was re-dissolved with a minimum amount of DCM for further precipitation, yielding the polymer that was then characterized using SEC and NMR.

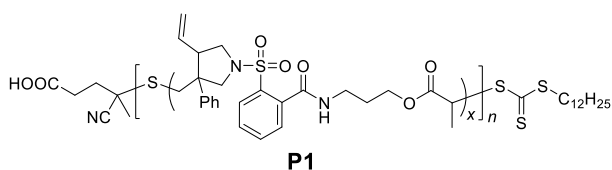

**<sup>1</sup>H NMR** (400 MHz, CDCl<sub>3</sub>):  $\delta$  8.01–7.79 (m, 1H), 7.67–7.41 (m, 3H), 7.32–7.01 (m, 5H), 6.85–6.58 (m, 1H), 5.88–5.65 (m, 1H), 5.23–4.86 (m, 2H), 4.28–3.92 (m, 1H), 3.92–3.61 (m, 1H), 3.61–3.17 (m, 4H), 3.13–2.61 (m, 2H), 2.36–1.77 (m, 3H), 1.76–1.34 (m, 2H), 1.34–1.00 (m, 2H), 0.88 (d,  $J$  = 27.2 Hz, 2H).

**<sup>13</sup>C NMR** (100 MHz, CDCl<sub>3</sub>):  $\delta$  176.9, 176.8, 176.5, 168.7, 142.6, 142.1, 136.8, 135.5, 135.0, 134.5, 132.7, 129.8, 129.3, 128.6, 128.2, 128.0, 127.9, 127.0, 126.9, 126.6, 119.1, 118.6, 118.3, 62.3, 61.8, 54.4, 53.7, 52.4, 52.2, 51.9, 50.8, 42.2, 41.0, 38.8, 37.1, 36.7, 36.6, 36.6, 36.3, 32.0, 30.1, 29.8, 28.1, 22.8, 19.8, 19.6, 19.1, 16.9, 14.2.

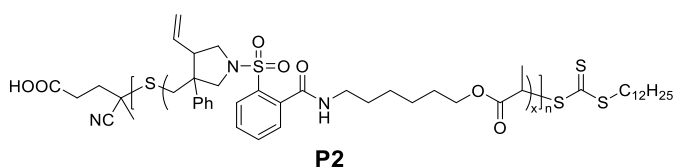

**<sup>1</sup>H NMR** (400 MHz, CDCl<sub>3</sub>):  $\delta$  8.02–7.70 (m, 1H), 7.66–7.40 (m, 3H), 7.38–7.05 (m, 5H), 6.47–6.13 (m, 1H), 5.91–5.62 (m, 1H), 5.24–4.89 (m, 2H), 4.15–3.94 (m, 1H), 3.94–3.79 (m, 1H), 3.78–3.49 (m, 1H), 3.49–3.21 (m, 4H), 3.19–2.65 (m, 2H), 2.25–2.01 (m, 1H), 1.70–1.49 (m, 4H), 1.49–1.04 (m, 7H), 1.02–0.80 (m, 2H).



**<sup>13</sup>C NMR** (100 MHz, CDCl<sub>3</sub>): δ 176.7, 176.6, 176.2, 172.9, 168.2, 142.5, 141.9, 136.8, 135.6, 135.4, 135.0, 134.9, 134.4, 133.8, 132.7, 129.7, 129.6, 128.9, 128.5, 128.4, 128.3, 128.2, 128.1, 127.9, 127.8, 127.1, 126.9, 126.8, 126.7, 126.6, 126.5, 119.3, 118.9, 118.3, 65.8, 65.0, 64.5, 64.2, 64.1, 56.0, 55.7, 55.1, 54.8, 54.4, 54.0, 53.8, 53.2, 53.0, 52.7, 52.5, 52.3, 52.2, 51.9, 51.0, 50.8, 50.4, 49.9, 42.1, 41.4, 40.9, 40.4, 40.3, 39.8, 38.6, 36.7, 36.6, 36.5, 36.2, 31.9, 29.6, 29.3, 29.1, 28.4, 28.3, 28.2, 26.6, 25.6, 25.5, 22.7, 19.7, 19.7, 19.4, 18.9, 16.9, 15.3.

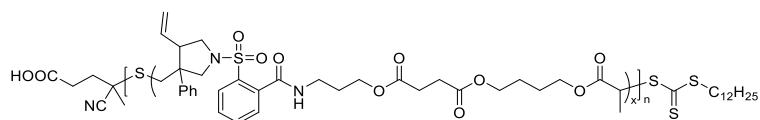

**P3**

**<sup>1</sup>H NMR** (400 MHz, CDCl<sub>3</sub>): δ 8.03–7.75 (m, 1H), 7.64–7.42 (m, 3H), 7.38–7.06 (m, 5H), 6.60–6.37 (m, 1H), 5.89–5.65 (m, 1H), 5.24–4.90 (m, 2H), 4.23 (s, 2H), 4.11–3.94 (m, 3H), 3.94–3.81 (m, 1H), 3.71–3.22 (m, 5H), 3.20–2.96 (m, 1H), 2.96–2.73 (m, 1H), 2.73–2.50 (m, 1H), 2.40–2.02 (m, 2H), 2.02–1.83 (m, 4H), 1.78–1.56 (m, 3H), 1.55–1.35 (m, 2H), 1.34–1.11 (m, 2H), 1.00–0.82 (m, 2H).

**<sup>13</sup>C NMR** (100 MHz, CDCl<sub>3</sub>): δ 176.6, 176.3, 172.7, 172.5, 168.6, 168.6, 142.6, 142.1, 138.7, 138.2, 136.8, 135.7, 135.5, 135.1, 134.6, 133.9, 132.8, 132.6, 129.8, 129.4, 129.2, 129.0, 128.6, 128.4, 128.3, 128.2, 128.0, 127.9, 127.3, 127.0, 126.9, 126.8, 126.6, 119.0, 118.5, 118.4, 64.6, 64.4, 64.3, 64.1, 63.6, 62.4, 55.7, 54.5, 54.3, 54.0, 53.8, 53.6, 53.2, 52.8, 52.4, 52.2, 52.2, 51.9, 50.8, 50.5, 50.0, 42.1, 41.0, 39.8, 38.7, 37.1, 36.8, 36.5, 36.3, 29.1, 28.3, 25.3, 25.2, 25.1, 25.0, 19.8, 19.5, 19.1, 17.0.

**Scheme S4.** Effect of RAFT reagent on the polymerization of monomer **1**.

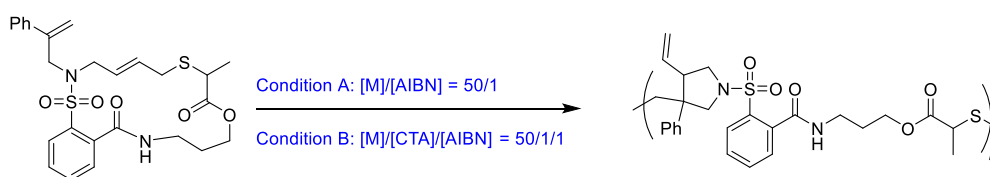

Two 5 mL vials were charged with monomer **1** (51.5 mg, 0.1 mmol), respectively. One vial (condition A) was added DMSO (950  $\mu$ L) and AIBN (0.04 M in DMSO, 50  $\mu$ L); the other vial (condition B) was added DMSO (900  $\mu$ L), **CTA1** (0.04 M in DMSO, 50  $\mu$ L) and AIBN (0.04 M in DMSO, 50  $\mu$ L). The vials were sealed. The solution was deoxygenated via three freeze-pump-thaw cycles, backfilled with nitrogen, and then heated at 70  $^{\circ}$ C for 48 h. After the reaction, the vials were cooled and opened to air to stop the polymerization. The monomer conversion was determined by  $^1$ H NMR analysis of the crude reaction mixture (condition A: 88%, condition B: 85%). Next, the reaction mixture was diluted with a minimum amount of DCM and precipitated in diethyl ether. The resulting solid was re-dissolved with a minimum amount of DCM for further precipitation. The obtained polymers were then characterized using SEC. Condition A:  $M_n = 12600$ ,  $D = 1.73$ ; Condition B:  $M_n = 10400$ ,  $D = 1.64$ .

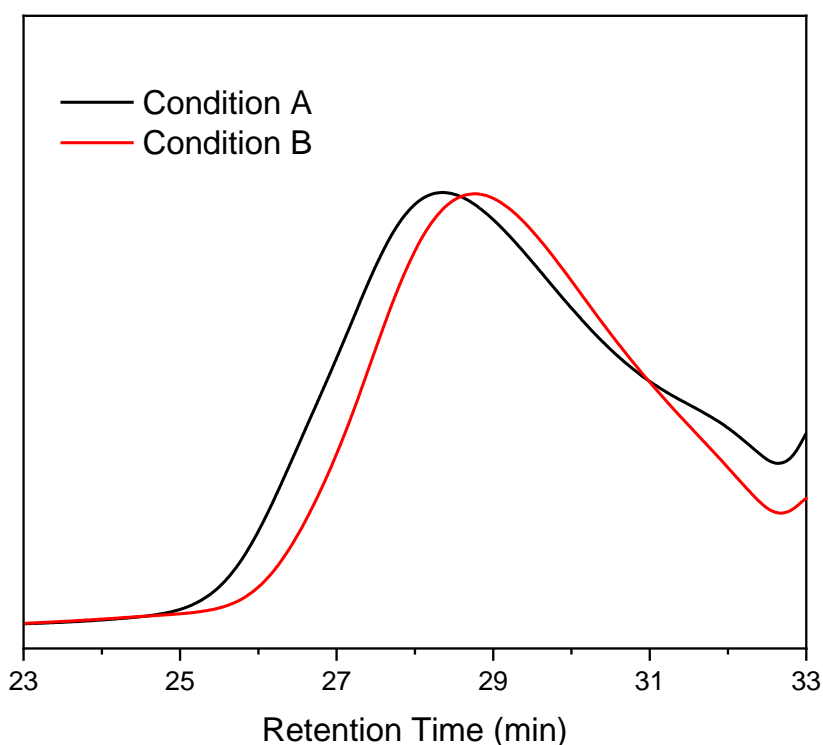

**Figure S1.** SEC traces showed that the RAFT reagent could not directly control the polymerization of monomer **1**.

**Table S1.** Effect of different CTAs on the polymerization of monomer **1**.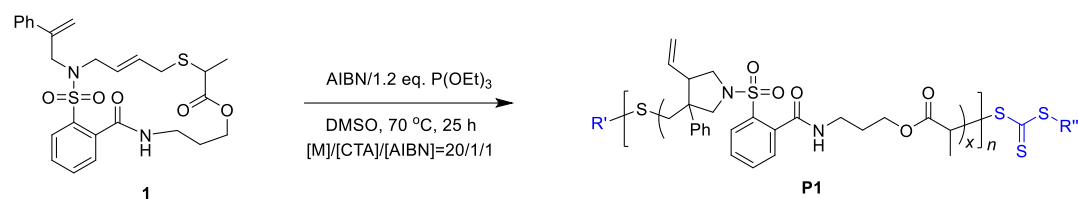

| Entry | CTA <sup>a</sup> | Conversion <sup>b</sup> | $M_n$ (Theo) <sup>c</sup> | $M_n$ (SEC) <sup>d</sup> | $\mathcal{D}$ <sup>d</sup> |
|-------|------------------|-------------------------|---------------------------|--------------------------|----------------------------|
| 1     | <br><b>CTA1</b>  | 80%                     | 8400                      | 7900                     | 1.42                       |
| 2     | <br><b>CTA2</b>  | 80%                     | 8300                      | 6700                     | 1.38                       |
| 3     | <br><b>CTA3</b>  | 81%                     | 8300                      | 6600                     | 1.42                       |
| 4     | <br><b>CTA4</b>  | 81%                     | 8400                      | 6700                     | 1.39                       |

<sup>a</sup> Experimental conditions:  $[M] = 0.1$  M in DMSO at 70 °C under a nitrogen atmosphere unless otherwise noted. <sup>b</sup> Monomer conversion was determined by <sup>1</sup>H NMR spectroscopy. <sup>c</sup> Theoretical molecular weight was calculated using the following equation:  $M_{n, \text{theo}} = ([M]_0/[CTA]_0) \times MW^M \times \text{conversion} + MW^{CTA}$ , where  $[M]_0$ ,  $[CTA]_0$ ,  $MW^M$  and  $MW^{CTA}$  correspond to initial monomer concentration, initial CTA concentration, average molar mass of the monomer and desulfurization unit, and molar mass of CTA, respectively. <sup>d</sup> Molecular weight and polydispersity index ( $\mathcal{D}$ ) were determined by SEC analysis calibrated to polystyrene standards.

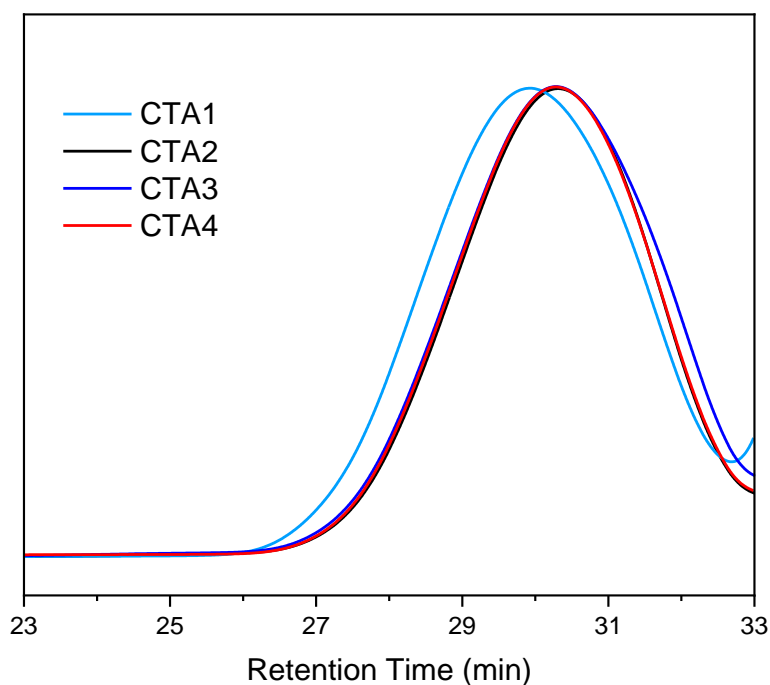**Figure S2.** SEC traces for the polymerization of monomer **1** in the presence of different CTAs.

**Table S2.** Effect of different amounts of P(OEt)<sub>3</sub> on the polymerization of monomer **1**.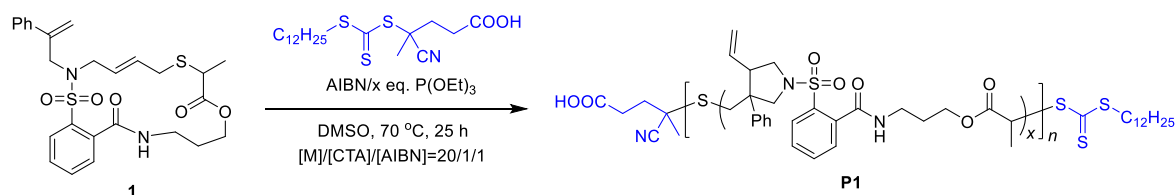

| Entry          | Equivalent of P(OEt) <sub>3</sub> <sup>a</sup> | Conversion <sup>b</sup> | $M_n$ (Theo) <sup>c</sup> | $M_n$ (SEC) <sup>d</sup> | $\bar{D}$ <sup>d</sup> |
|----------------|------------------------------------------------|-------------------------|---------------------------|--------------------------|------------------------|
| 1              | 0.8 eq.                                        | 84%                     | 8800                      | 7700                     | 1.40                   |
| 2 <sup>e</sup> | 1.2 eq.                                        | 80%                     | 8400                      | 7900                     | 1.42                   |
| 3              | 1.5 eq.                                        | 79%                     | 8300                      | 7600                     | 1.44                   |

<sup>a</sup> Experimental conditions: [M] = 0.1 M in DMSO at 70 °C under a nitrogen atmosphere unless otherwise noted. <sup>b</sup> Monomer conversion was determined by <sup>1</sup>H NMR spectroscopy. <sup>c</sup> Theoretical molecular weight was calculated using the following equation:  $M_{n, \text{theo}} = ([M]_0/[CTA]_0) \times MW^M \times \text{conversion} + MW^{CTA}$ , where [M]<sub>0</sub>, [CTA]<sub>0</sub>, MW<sup>M</sup> and MW<sup>CTA</sup> correspond to initial monomer concentration, initial CTA concentration, average molar mass of the monomer and desulfurization unit, and molar mass of CTA, respectively. <sup>d</sup> Molecular weight and polydispersity index ( $\bar{D}$ ) were determined by SEC analysis calibrated to polystyrene standards. <sup>e</sup> Data taken from Table S1, entry 1.

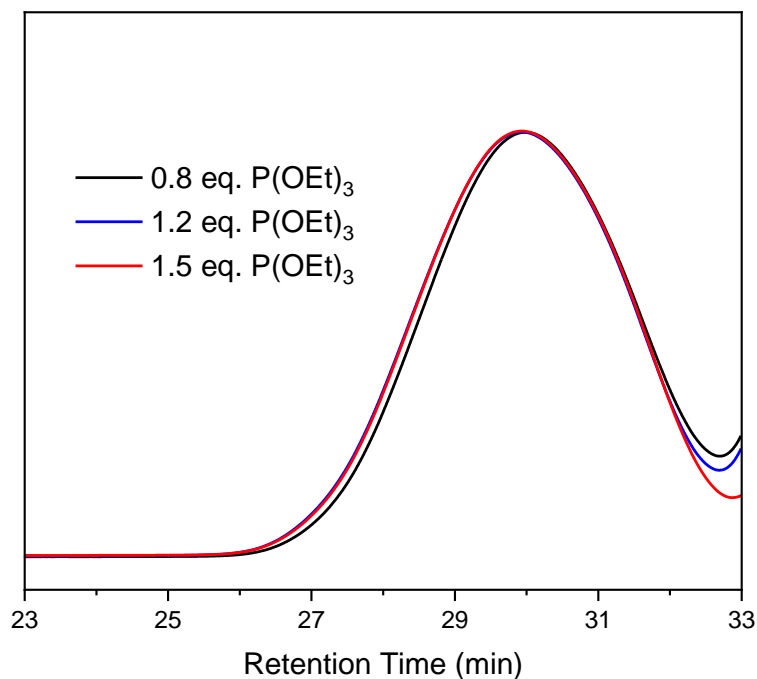**Figure S3.** SEC traces for the polymerization of monomer **1** at different amounts of P(OEt)<sub>3</sub>.

**Table S3.** Effect of different trivalent phosphorus on the polymerization of monomer **1**.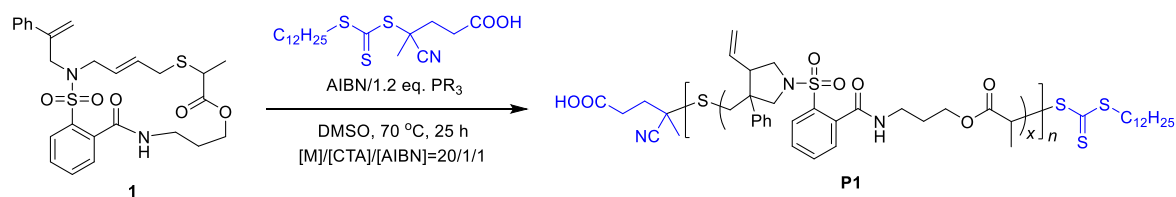

| Entry          | Equivalent of PR <sub>3</sub> <sup>a</sup> | Conversion <sup>b</sup> | <i>M</i> <sub>n (Theo)</sub> <sup>c</sup> | <i>M</i> <sub>n (SEC)</sub> <sup>d</sup> | <i>Đ</i> <sup>d</sup> |
|----------------|--------------------------------------------|-------------------------|-------------------------------------------|------------------------------------------|-----------------------|
| 1 <sup>e</sup> | P(OEt) <sub>3</sub>                        | 80%                     | 8400                                      | 7900                                     | 1.42                  |
| 2              | PPh <sub>3</sub>                           | 82%                     | 8600                                      | 6300                                     | 1.43                  |
| 3              | PPh <sub>2</sub> Pr                        | 78%                     | 8200                                      | 6800                                     | 1.44                  |
| 4              | PPhMe <sub>2</sub>                         | 67%                     | 7100                                      | 6500                                     | 1.36                  |

<sup>a</sup> Experimental conditions: [M] = 0.1 M in DMSO at 70 °C under a nitrogen atmosphere unless otherwise noted. <sup>b</sup> Monomer conversion was determined by <sup>1</sup>H NMR spectroscopy. <sup>c</sup> Theoretical molecular weight was calculated using the following equation:  $M_{n, \text{theo}} = ([M]_0/[CTA]_0) \times MW^M \times \text{conversion} + MW^{CTA}$ , where [M]<sub>0</sub>, [CTA]<sub>0</sub>, MW<sup>M</sup> and MW<sup>CTA</sup> correspond to initial monomer concentration, initial CTA concentration, average molar mass of the monomer and desulfurization unit, and molar mass of CTA, respectively. <sup>d</sup> Molecular weight and polydispersity index (*Đ*) were determined by SEC analysis calibrated to polystyrene standards. <sup>e</sup> Data taken from Table S1, entry 1.

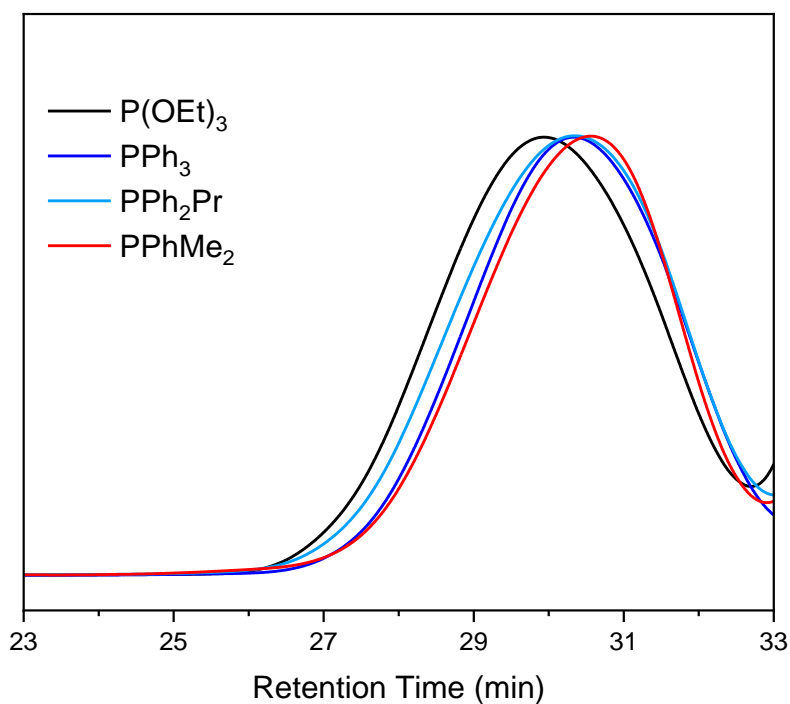**Figure S4.** SEC traces for the polymerization of monomer **1** with different trivalent phosphorus.

**Table S4.** Effect of different reaction time on the polymerization of monomer **1**.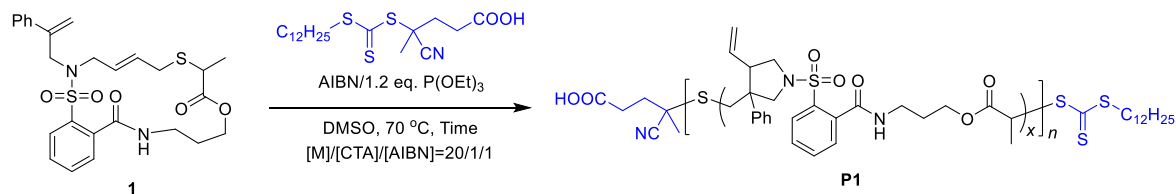

| Entry          | Time <sup>a</sup> | Conversion <sup>b</sup> | $M_n$ (Theo) <sup>c</sup> | $M_n$ (SEC) <sup>d</sup> | $\bar{D}$ <sup>d</sup> |
|----------------|-------------------|-------------------------|---------------------------|--------------------------|------------------------|
| 1              | 9 h               | 77%                     | 8100                      | 7700                     | 1.39                   |
| 2              | 12 h              | 79%                     | 8300                      | 7800                     | 1.41                   |
| 3              | 15 h              | 83%                     | 8700                      | 8200                     | 1.46                   |
| 4 <sup>e</sup> | 25 h              | 80%                     | 8400                      | 7900                     | 1.42                   |

<sup>a</sup> Experimental conditions: [M] = 0.1 M in DMSO at 70 °C under a nitrogen atmosphere unless otherwise noted. <sup>b</sup> Monomer conversion was determined by <sup>1</sup>H NMR spectroscopy. <sup>c</sup> Theoretical molecular weight was calculated using the following equation:  $M_{n, \text{theo}} = ([M]_0/[CTA]_0) \times MW^M \times \text{conversion} + MW^{CTA}$ , where [M]<sub>0</sub>, [CTA]<sub>0</sub>, MW<sup>M</sup> and MW<sup>CTA</sup> correspond to initial monomer concentration, initial CTA concentration, average molar mass of the monomer and desulfurization unit, and molar mass of CTA, respectively. <sup>d</sup> Molecular weight and polydispersity index ( $\bar{D}$ ) were determined by SEC analysis calibrated to polystyrene standards. <sup>e</sup> Data taken from Table S1, entry 1.

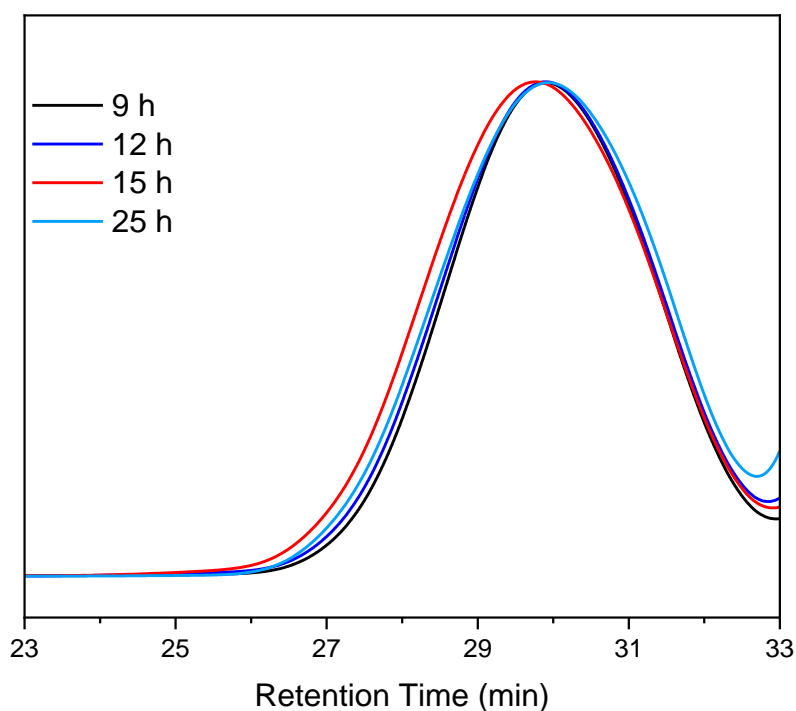**Figure S5.** SEC traces for the polymerization of monomer **1** at different reaction time.

**Table S5.** Effect of different solvents on the polymerization of monomer **1**.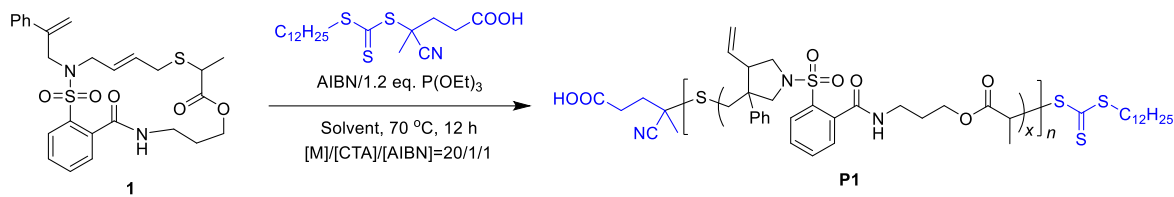

| Entry          | Solvents <sup>a</sup> | Conversion <sup>b</sup> | $M_{n(\text{Theo})}^c$ | $M_{n(\text{SEC})}^d$ | $\mathcal{D}^d$ |
|----------------|-----------------------|-------------------------|------------------------|-----------------------|-----------------|
| 1 <sup>e</sup> | DMSO                  | 79%                     | 8300                   | 7800                  | 1.41            |
| 2              | DMF                   | 62%                     | 6600                   | 6000                  | 1.40            |
| 3              | Toluene               | <5%                     | /                      | /                     | /               |
| 4              | Dioxane               | 68%                     | 7200                   | 7900                  | 1.40            |
| 5              | THF                   | 57%                     | 6100                   | 5900                  | 1.33            |

<sup>a</sup> Experimental conditions:  $[M] = 0.1 \text{ M}$  at  $70 \text{ }^\circ\text{C}$  under a nitrogen atmosphere unless otherwise noted. <sup>b</sup> Monomer conversion was determined by  $^1\text{H NMR}$  spectroscopy. <sup>c</sup> Theoretical molecular weight was calculated using the following equation:  $M_{n(\text{theo})} = ([M]_0/[CTA]_0) \times MW^M \times \text{conversion} + MW^{\text{CTA}}$ , where  $[M]_0$ ,  $[CTA]_0$ ,  $MW^M$  and  $MW^{\text{CTA}}$  correspond to initial monomer concentration, initial CTA concentration, average molar mass of the monomer and desulfurization unit, and molar mass of CTA, respectively. <sup>d</sup> Molecular weight and polydispersity index ( $\mathcal{D}$ ) were determined by SEC analysis calibrated to polystyrene standards. <sup>e</sup> Data taken from Table S4, entry 2.

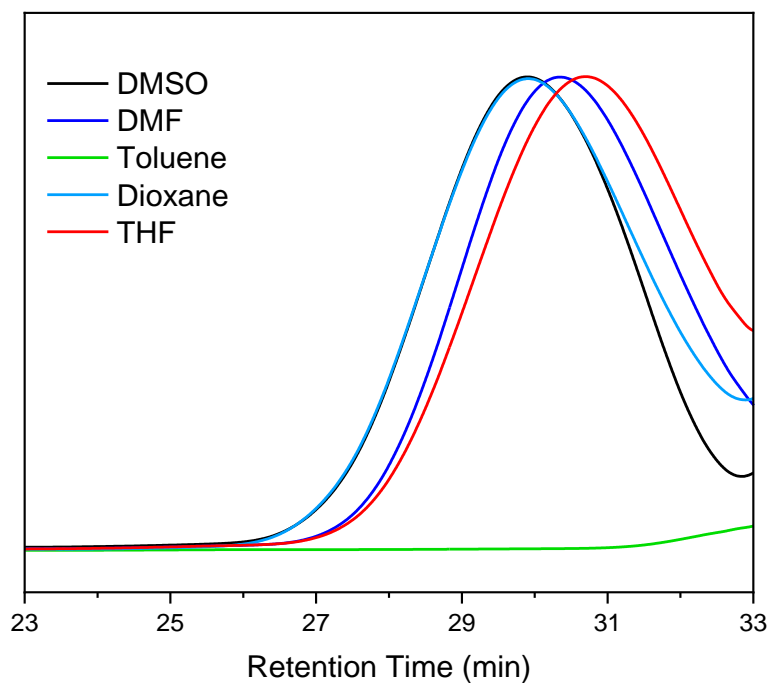**Figure S6.** SEC traces for the polymerization of monomer **1** in different solvents.

**Table S6.** Effect of different concentrations on the polymerization of monomer **1**.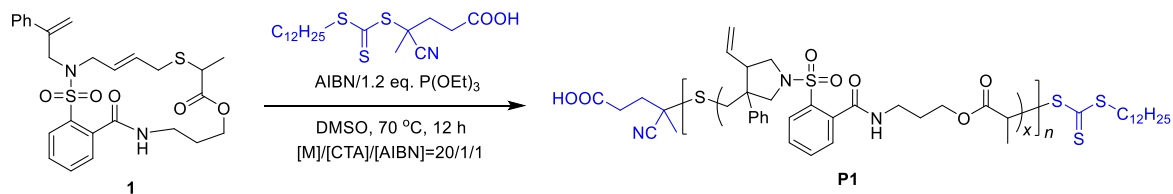

| Entry          | Monomer concentration <sup>a</sup> | Conversion <sup>b</sup> | $M_{n(\text{Theo})}$ <sup>c</sup> | $M_{n(\text{SEC})}$ <sup>d</sup> | $D$ <sup>d</sup> |
|----------------|------------------------------------|-------------------------|-----------------------------------|----------------------------------|------------------|
| 1              | 0.05 M                             | 58%                     | 6200                              | 6100                             | 1.20             |
| 2 <sup>e</sup> | 0.1 M                              | 79%                     | 8300                              | 7800                             | 1.41             |
| 3              | 0.2 M                              | 94%                     | 9800                              | 11100                            | 1.63             |

<sup>a</sup> Experimental conditions: carried out in DMSO at 70 °C under a nitrogen atmosphere unless otherwise noted. <sup>b</sup> Monomer conversion was determined by <sup>1</sup>H NMR spectroscopy. <sup>c</sup> Theoretical molecular weight was calculated using the following equation:  $M_{n(\text{theo})} = ([M]_0/[CTA]_0) \times MW^{\text{M}} \times \text{conversion} + MW^{\text{CTA}}$ , where  $[M]_0$ ,  $[CTA]_0$ ,  $MW^{\text{M}}$  and  $MW^{\text{CTA}}$  correspond to initial monomer concentration, initial CTA concentration, average molar mass of the monomer and desulfurization unit, and molar mass of CTA, respectively. <sup>d</sup> Molecular weight and polydispersity index ( $D$ ) were determined by SEC analysis calibrated to polystyrene standards. <sup>e</sup> Data taken from Table S4, entry 2.

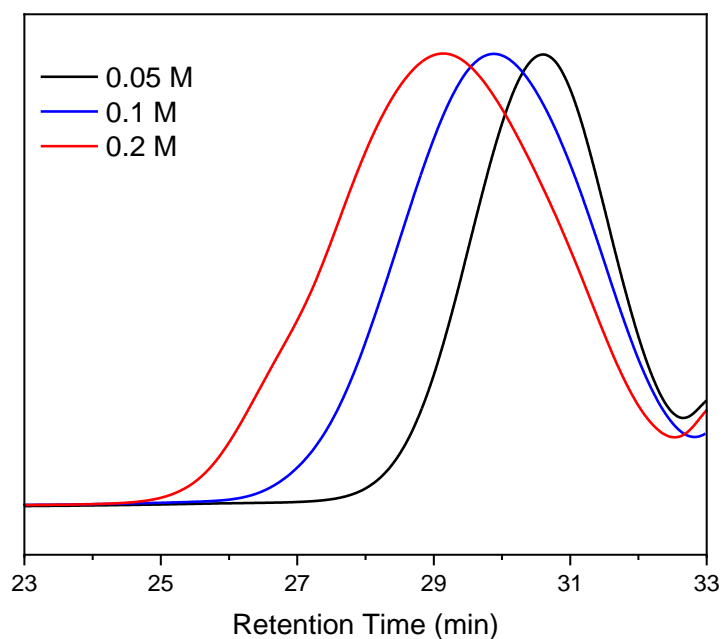**Figure S7.** SEC traces for the polymerization of monomer **1** at different concentrations.



**Table S7.** Effect of different amount of AIBN on the polymerization of monomer **1**.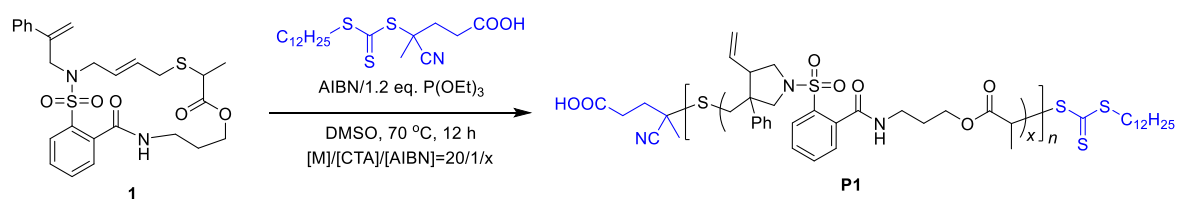

| Entry          | [M]/[CTA]/[AIBN] <sup>a</sup> | Conversion <sup>b</sup> | $M_{n(\text{Theo})}$ <sup>c</sup> | $M_{n(\text{SEC})}$ <sup>d</sup> | $\bar{D}$ <sup>d</sup> |
|----------------|-------------------------------|-------------------------|-----------------------------------|----------------------------------|------------------------|
| 1 <sup>e</sup> | 20/1/1                        | 79%                     | 8300                              | 7800                             | 1.41                   |
| 2              | 20/1/0.5                      | 63%                     | 6700                              | 8100                             | 1.32                   |
| 3              | 20/1/0.3                      | 50%                     | 5400                              | 8100                             | 1.27                   |
| 4              | 20/1/0.1                      | 37%                     | 4100                              | 6300                             | 1.17                   |

<sup>a</sup> Experimental conditions: [M] = 0.1 M in DMSO at 70 °C under a nitrogen atmosphere unless otherwise noted. <sup>b</sup> Monomer conversion was determined by <sup>1</sup>H NMR spectroscopy. <sup>c</sup> Theoretical molecular weight was calculated using the following equation:  $M_{n(\text{theo})} = ([M]_0/[CTA]_0) \times MW^M \times \text{conversion} + MW^{\text{CTA}}$ , where [M]<sub>0</sub>, [CTA]<sub>0</sub>, MW<sup>M</sup> and MW<sup>CTA</sup> correspond to initial monomer concentration, initial CTA concentration, average molar mass of the monomer and desulfurization unit, and molar mass of CTA, respectively. <sup>d</sup> Molecular weight and polydispersity index ( $\bar{D}$ ) were determined by SEC analysis calibrated to polystyrene standards. <sup>e</sup> Data taken from Table S4, entry 2.

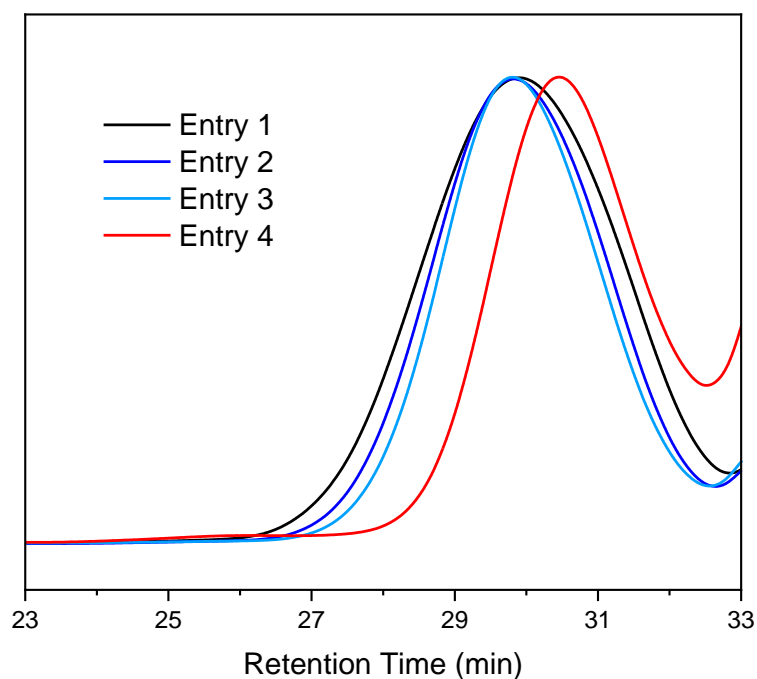**Figure S8.** SEC traces for the polymerization of monomer **1** at different amount of AIBN.

**Table S8.** Polymerization of monomer **1** at different monomer/CTA ratios.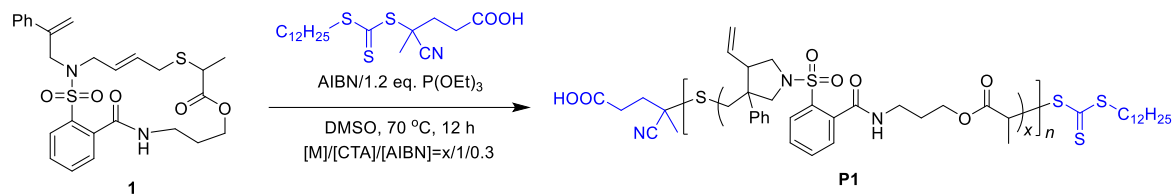

| Entry          | [M]/[CTA]/[AIBN] <sup>a</sup> | Conversion <sup>b</sup> | $M_n$ (Theo) <sup>c</sup> | $M_n$ (SEC) <sup>d</sup> | $D^d$ |
|----------------|-------------------------------|-------------------------|---------------------------|--------------------------|-------|
| 1              | 10/1/0.3                      | 69%                     | 3800                      | 6100                     | 1.22  |
| 2 <sup>e</sup> | 20/1/0.3                      | 50%                     | 5400                      | 8100                     | 1.27  |
| 3              | 50/1/0.3                      | 36%                     | 9400                      | 9000                     | 1.33  |
| 4 <sup>f</sup> | 50/1/0.3                      | 46%                     | 11900                     | 9900                     | 1.40  |
| 5              | 100/1/0.3                     | 29%                     | 14900                     | 9300                     | 1.37  |
| 6 <sup>f</sup> | 100/1/0.5                     | 41%                     | 21500                     | 13500                    | 1.54  |

<sup>a</sup> Experimental conditions: [M] = 0.1 M in DMSO at 70 °C under a nitrogen atmosphere unless otherwise noted. <sup>b</sup> Monomer conversion was determined by <sup>1</sup>H NMR spectroscopy. <sup>c</sup> Theoretical molecular weight was calculated using the following equation:  $M_{n \text{ theo}} = ([M]_0/[CTA]_0) \times MW^M \times \text{conversion} + MW^{CTA}$ , where [M]<sub>0</sub>, [CTA]<sub>0</sub>, MW<sup>M</sup> and MW<sup>CTA</sup> correspond to initial monomer concentration, initial CTA concentration, average molar mass of the monomer and desulfurization unit, and molar mass of CTA, respectively. <sup>d</sup> Molecular weight and polydispersity index (*D*) were determined by SEC analysis calibrated to polystyrene standards. <sup>e</sup> Data taken from Table S7, entry 3. <sup>f</sup> 24 h.

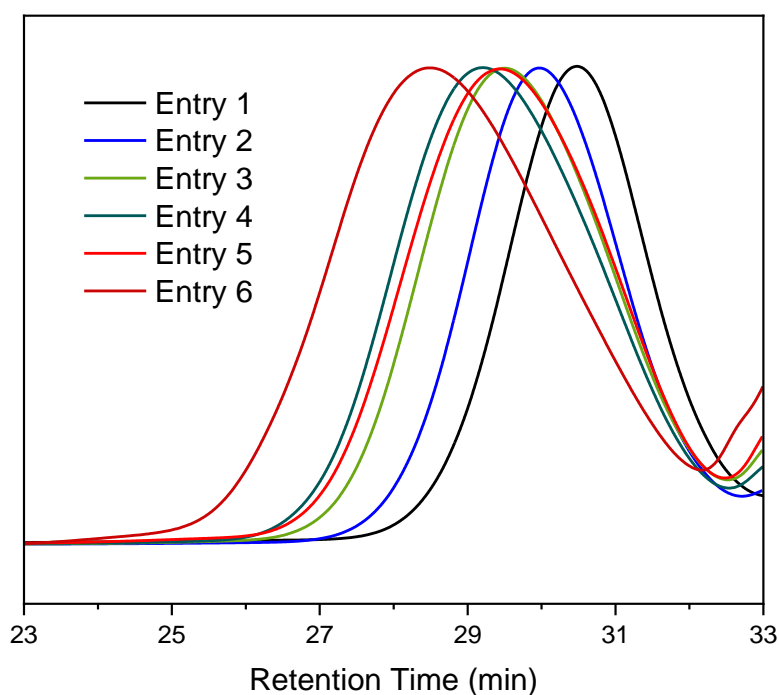**Figure S9.** SEC traces for the polymerization of monomer **1** at different monomer/CTA ratios.

**Table S9.** Polymerization of monomer **2** at different monomer/CTA ratios.

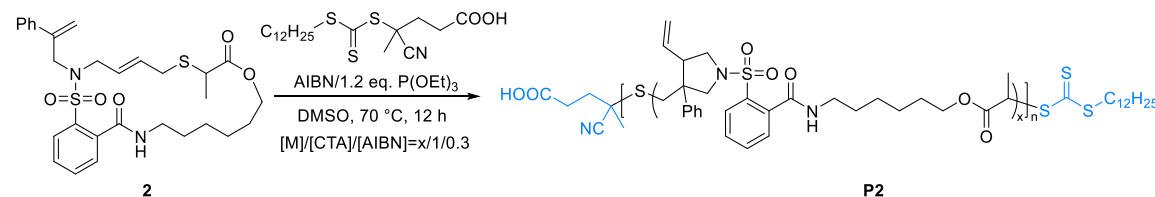

**2** **P2**

| Entry | [M]/[CTA] <sup>a</sup> | Conversion <sup>b</sup> | $M_{n(\text{Theo})}$ <sup>c</sup> | $M_{n(\text{SEC})}$ <sup>d</sup> | $\mathcal{D}$ <sup>d</sup> |
|-------|------------------------|-------------------------|-----------------------------------|----------------------------------|----------------------------|
| 1     | 10/1                   | 65%                     | 4000                              | 8000                             | 1.26                       |
| 2     | 20/1                   | 55%                     | 6500                              | 10400                            | 1.33                       |
| 3     | 50/1                   | 32%                     | 9300                              | 13600                            | 1.38                       |
| 4     | 100/1                  | 23%                     | 13200                             | 14700                            | 1.48                       |

<sup>a</sup> Experimental conditions: **[M]** = 0.1 M in DMSO at 70 °C under a nitrogen atmosphere unless otherwise noted. <sup>b</sup> Monomer conversion was determined by <sup>1</sup>H NMR spectroscopy. <sup>c</sup> Theoretical molecular weight was calculated using the following equation:  $M_{n(\text{theo})} = ([M]_0/[CTA]_0) \times MW^M \times \text{conversion} + MW^{\text{CTA}}$ , where  $[M]_0$ ,  $[CTA]_0$ ,  $MW^M$  and  $MW^{\text{CTA}}$  correspond to initial monomer concentration, initial CTA concentration, average molar mass of the monomer and desulfurization unit, and molar mass of CTA, respectively. <sup>d</sup> Molecular weight and polydispersity index ( $\mathcal{D}$ ) were determined by SEC analysis calibrated to polystyrene standards.

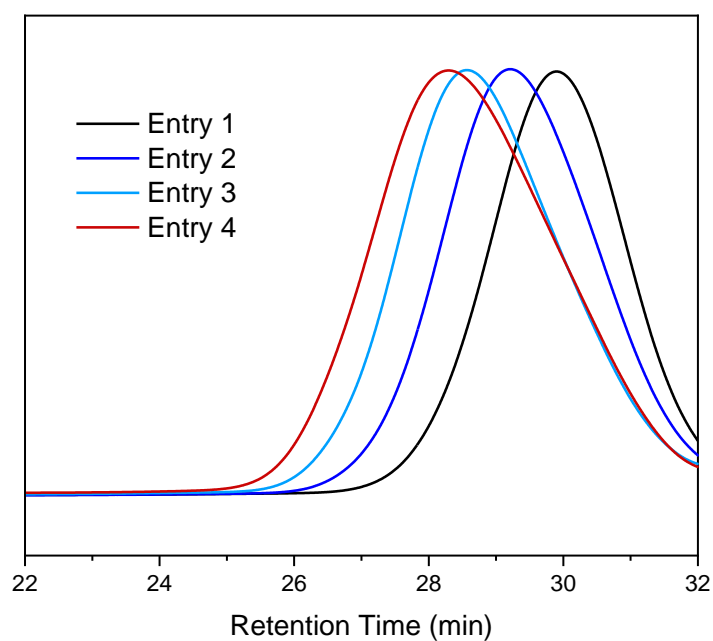**Figure S10.** SEC traces for the polymerization of monomer **2** at different monomer/CTA ratios.

**Table S10.** Polymerization of monomer **3** at different monomer/CTA ratios.

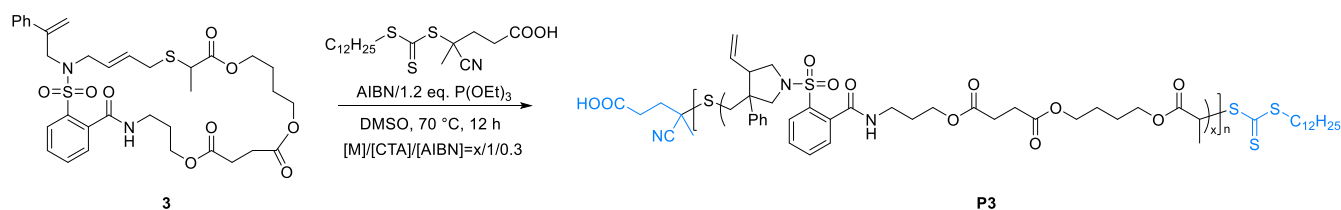

| Entry          | [M]/[CTA] <sup>a</sup> | Conversion <sup>b</sup> | $M_{n(\text{Theo})}$ <sup>c</sup> | $M_{n(\text{SEC})}$ <sup>d</sup> | $D$ <sup>d</sup> |
|----------------|------------------------|-------------------------|-----------------------------------|----------------------------------|------------------|
| 1              | 10/1                   | 77%                     | 5600                              | 11200                            | 1.30             |
| 2              | 20/1                   | 61%                     | 8600                              | 14300                            | 1.39             |
| 3              | 50/1                   | 49%                     | 16800                             | 17900                            | 1.42             |
| 4              | 100/1                  | 42%                     | 28600                             | 18300                            | 1.49             |
| 5 <sup>e</sup> | 100/1                  | 47%                     | 32000                             | 18100                            | 1.55             |

<sup>a</sup> Experimental conditions:  $[M] = 0.1$  M in DMSO at 70 °C under a nitrogen atmosphere unless otherwise noted. <sup>b</sup> Monomer conversion was determined by <sup>1</sup>H NMR spectroscopy. <sup>c</sup> Theoretical molecular weight was calculated using the following equation:  $M_{n(\text{theo})} = ([M]_0/[CTA]_0) \times MW^M \times \text{conversion} + MW^{CTA}$ , where  $[M]_0$ ,  $[CTA]_0$ ,  $MW^M$  and  $MW^{CTA}$  correspond to initial monomer concentration, initial CTA concentration, average molar mass of the monomer and desulfurization unit, and molar mass of CTA, respectively. <sup>d</sup> Molecular weight and polydispersity index ( $D$ ) were determined by SEC analysis calibrated to polystyrene standards. <sup>e</sup> 24 h.

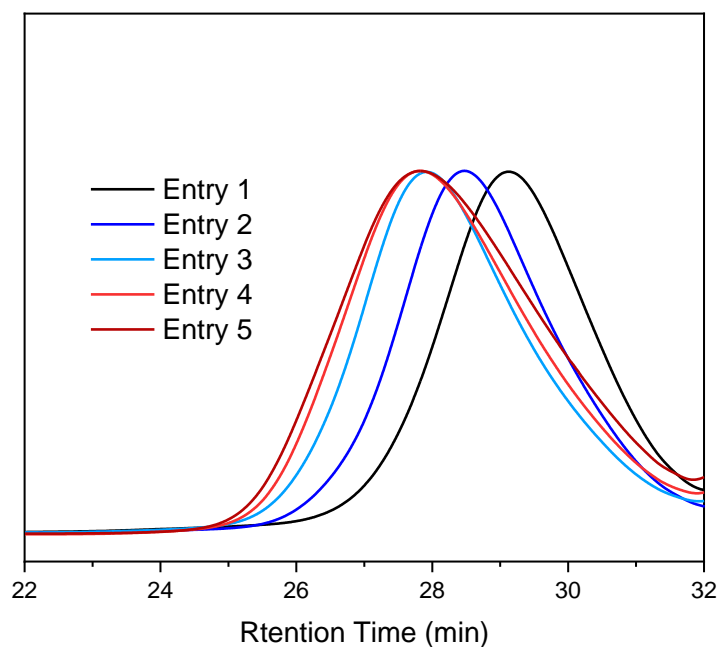

**Figure S11.** SEC traces for the polymerization of monomer **3** at different monomer/CTA ratios.

**Scheme S5.** Kinetic study of polymerization of monomer **1**.

A 10 mL vial was charged with macrocyclic monomer **1** (257.3 mg, 0.5 mmol), followed by the addition of **CTA1** (0.04 M in DMSO, 625  $\mu$ L, 25  $\mu$ mol), AIBN (0.01 M in DMSO, 750  $\mu$ L, 7.5  $\mu$ mol), P(OEt)<sub>3</sub> (0.6 mmol) and DMSO (3.625 mL). The solution was divided into five Schlenk vials. The vials were sealed. The solution was deoxygenated via three freeze-pump-thaw cycles, backfilled with nitrogen. Five identical reactions were carried out in parallel at 70 °C and stopped at different reaction times ( $t = 3, 4, 5, 7, 9$  h). The vial was cooled and opened to air to stop the polymerization. The monomer conversion was determined by <sup>1</sup>H NMR analysis of the crude reaction mixture. The reaction mixture was diluted with a minimum amount of DCM and precipitated with hexane twice, yielding the polymer **P1**. The resulting polymer was then characterized using SEC to determine its molecular weight and dispersity.

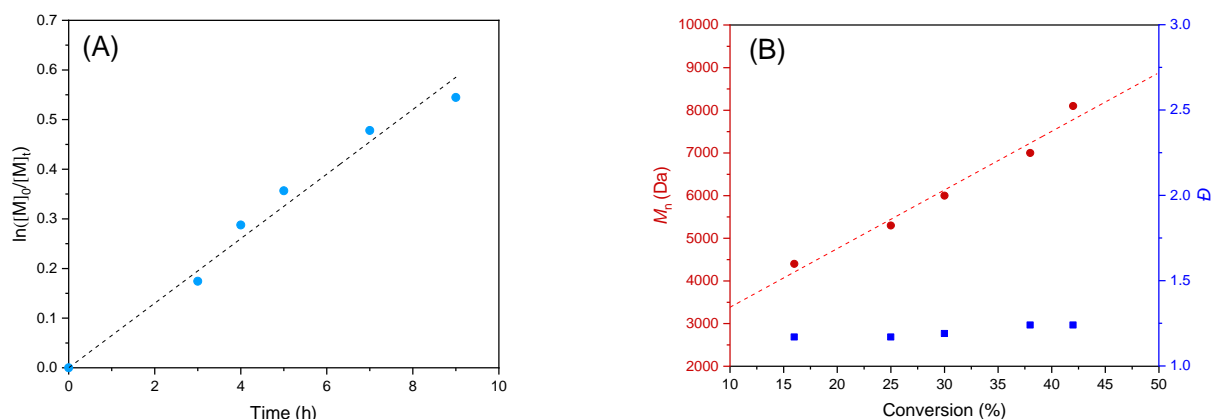

**Figure S12.** (A) Plot of  $\ln([M]_0/[M]_t)$  versus time. (B) Plots of  $M_n$  and  $\bar{D}$  versus monomer conversion.

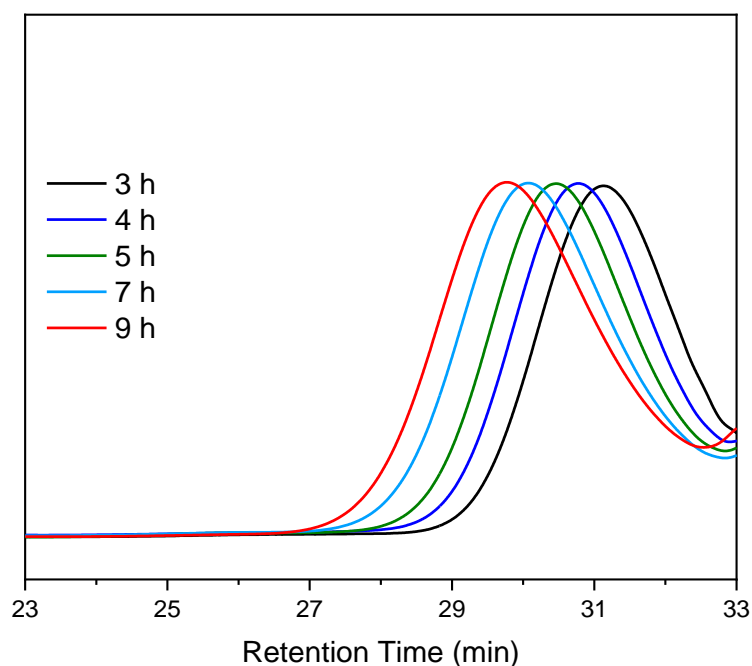

**Figure S13.** SEC traces for the kinetic study of the polymerization of monomer **1**.

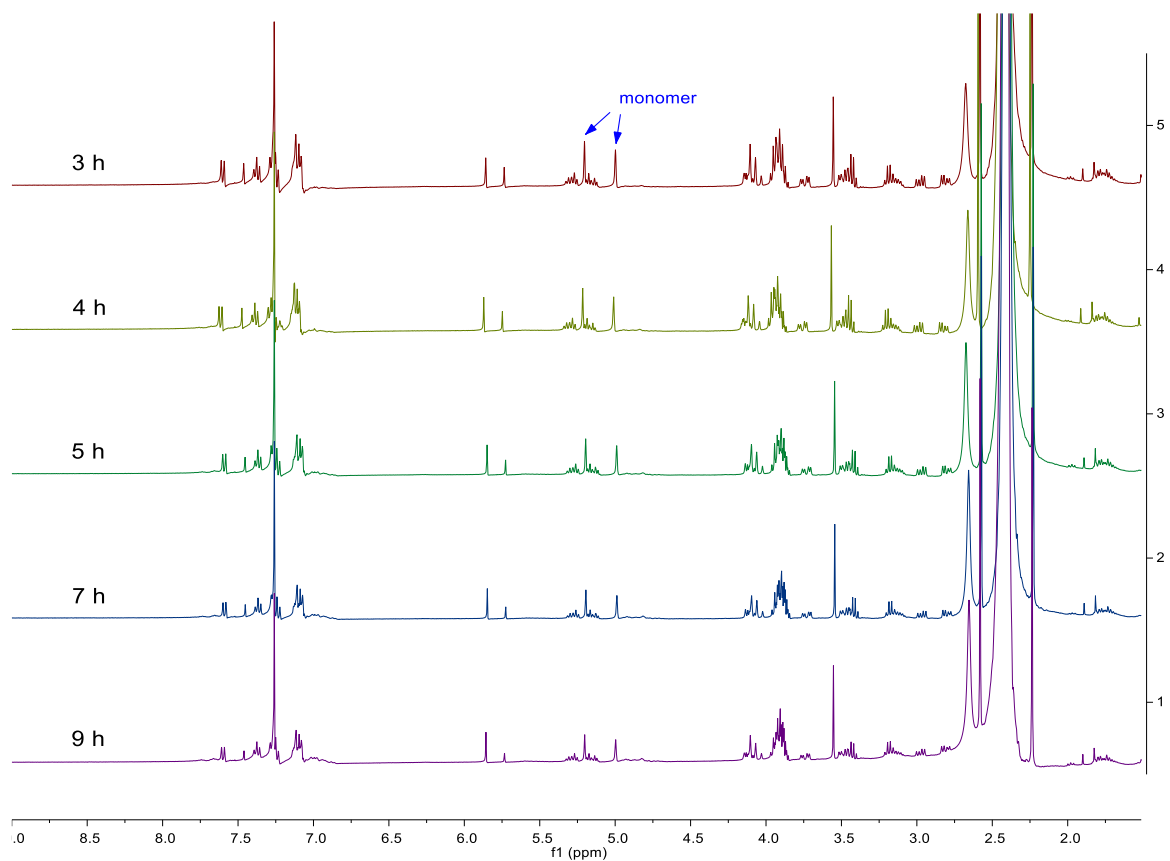

**Figure S14.** NMR traces for the kinetic study of the polymerization of monomer **1**.

**Scheme S6.** Polymer synthesis for MALDI-TOF analysis.

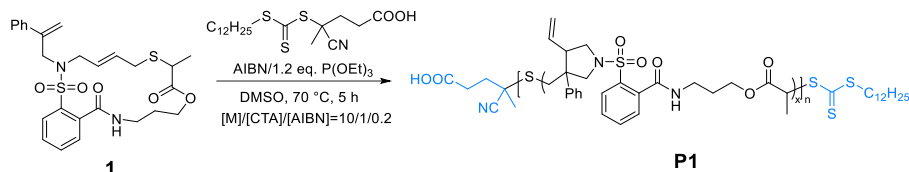

Following the general polymerization procedure, a 10 mL Schlenk vial was charged with macrocyclic monomer **1** (51.5 mg, 0.1 mmol), followed by the addition of **CTA1** (0.04 M in DMSO, 250  $\mu$ L, 10  $\mu$ mol), AIBN (0.01 M in DMSO, 200  $\mu$ L, 2  $\mu$ mol), P(OEt)<sub>3</sub> (0.12 mmol) and DMSO (550  $\mu$ L). The vial was sealed, and the solution was deoxygenated via three freeze-pump-thaw cycles, backfilled with nitrogen, then heated at 70 °C for 5 h. The vial was cooled and opened to air to stop the polymerization. The reaction mixture was precipitated twice with diethyl ether, yielding the polymer **P1** ( $M_n = 4800$ ,  $D = 1.08$ ) for the MALDI-TOF analysis.

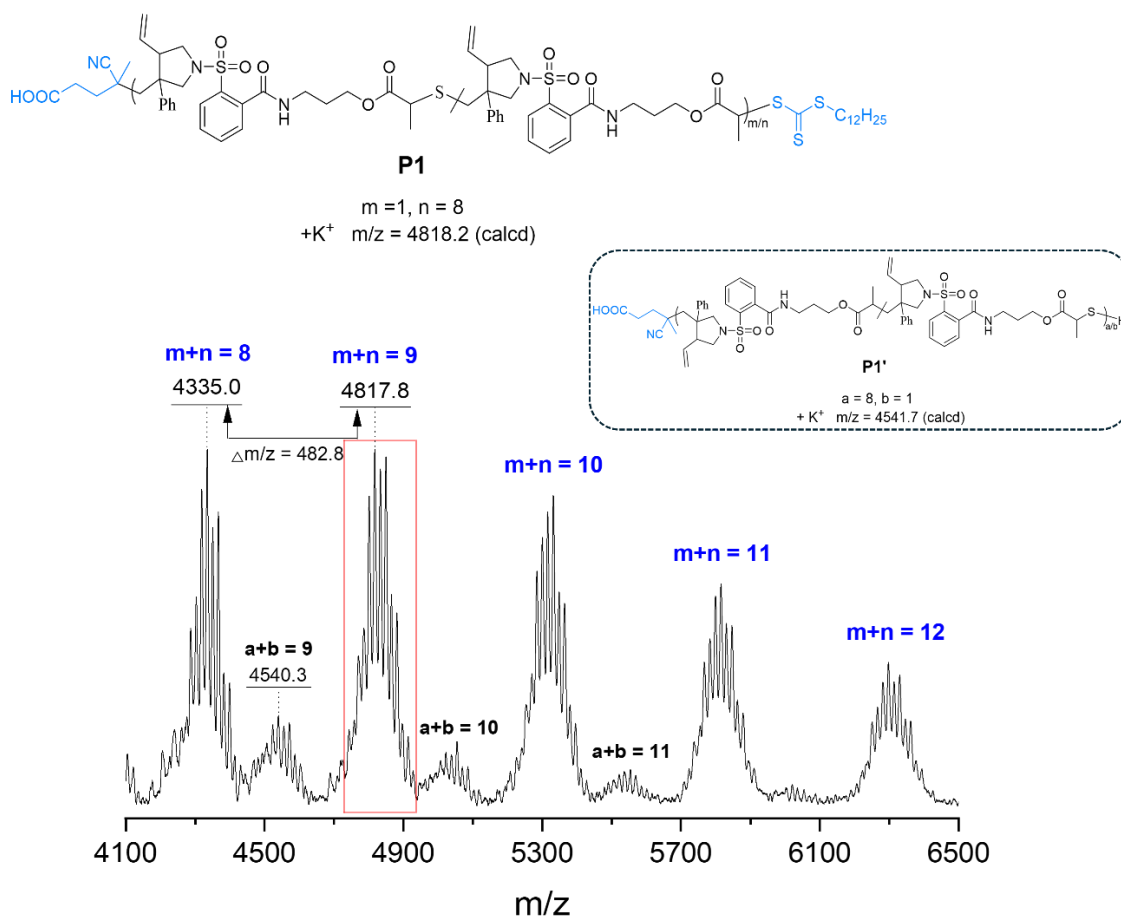

**Figure S15.** MALDI-TOF analysis of polymer **P1**.

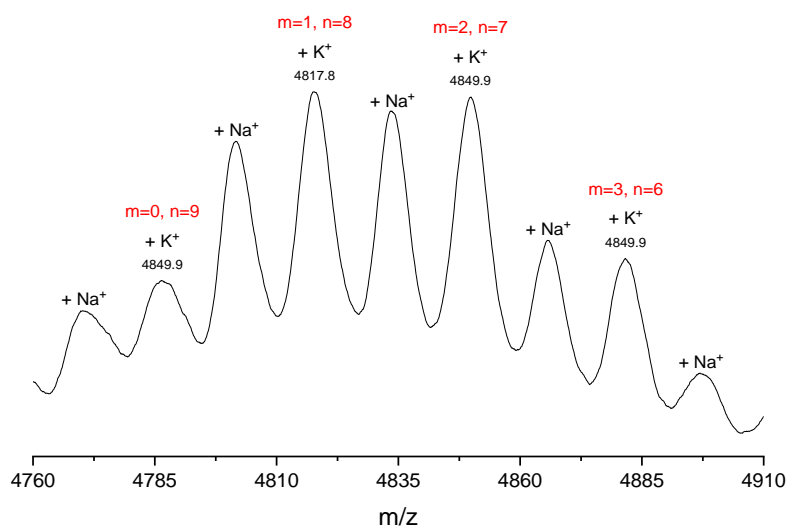

**Figure S16.** The zoom-in image of the 9-mers in the MALDI-TOF spectrum of polymer **P1**.

| <b>Organic Elemental Analysis (EA) Report</b> |                                 |       |      |      |      |
|-----------------------------------------------|---------------------------------|-------|------|------|------|
| <b>Basic information about the experiment</b> |                                 |       |      |      |      |
| Test item                                     | Organic Elemental Analysis (EA) |       |      |      |      |
| Order number                                  | 2411120267                      |       |      |      |      |
| Number of samples                             | 1                               |       |      |      |      |
| Test mode                                     | CHNS mode                       |       |      |      |      |
| Date of detection                             | 2024.11.17                      |       |      |      |      |
| CHNS mode                                     | Elementar UNICUBE (Germany)     |       |      |      |      |
| Description of Special Circumstances          | None                            |       |      |      |      |
| <b>Experimental results</b>                   |                                 |       |      |      |      |
| Sample name                                   | N(%)                            | C(%)  | H(%) | S(%) | O(%) |
| HHJ-04-070                                    | 5.19                            | 61.71 | 6.28 | 8.97 | \    |
| HHJ-04-070                                    | 5.35                            | 61.86 | 6.37 | 8.80 | \    |

**Figure S17.** Elemental analysis of polymer **P1**.

Note: the desulfurization yield determined by elemental analysis is 61%.



### Scheme S7. Synthesis of diblock copolymer **P1-b-P2**.

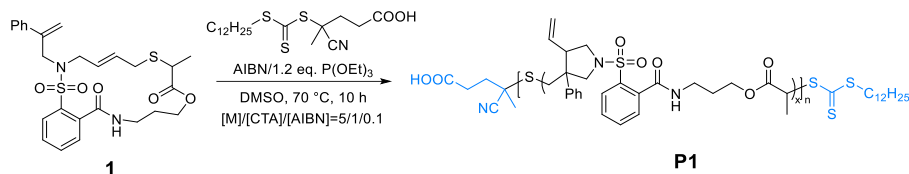

Following the general polymerization procedure, a 10 mL Schlenk vial was charged with macrocyclic monomer **1** (51.5 mg, 0.1 mmol), followed by the addition of **CTA1** (0.04 M in DMSO, 500  $\mu$ L, 20  $\mu$ mol), AIBN (0.01 M in DMSO, 200  $\mu$ L, 2  $\mu$ mol), P(OEt)<sub>3</sub> (0.12 mmol) and DMSO (300  $\mu$ L). The vial was sealed, and the solution was deoxygenated via three freeze-pump-thaw cycles, backfilled with nitrogen, then heated at 70 °C for 10 h. The vial was cooled and opened to air to stop the polymerization. The monomer conversion was monitored by <sup>1</sup>H NMR spectroscopy (46% monomer conversion). The reaction mixture was precipitated twice with diethyl ether, yielding the macroinitiator **P1** ( $M_n = 5800$ ,  $\mathcal{D} = 1.11$ ).

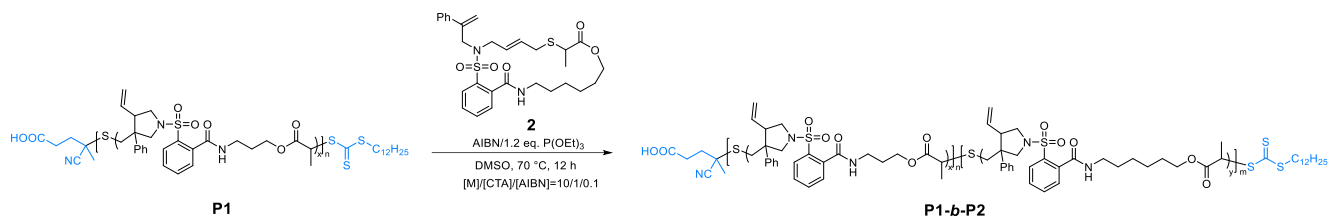

A 10 mL Schlenk vial was charged with monomer **2** (11.1 mg, 0.02 mmol), macroinitiator **P1** (2  $\mu$ mol), AIBN (0.01 M in DMSO, 20  $\mu$ L, 1  $\mu$ mol), and DMSO (180  $\mu$ L). The vial was sealed, and the solution was deoxygenated via three freeze-pump-thaw cycles, backfilled with nitrogen, then heated at 70 °C for 12 h. The vial was cooled and opened to air to stop the polymerization. The monomer conversion was monitored by <sup>1</sup>H NMR spectroscopy (47% monomer conversion). The reaction mixture was precipitated twice with ethyl ether, yielding the polymer **P1-b-P2** ( $M_n = 8000$ ,  $\mathcal{D} = 1.22$ ).

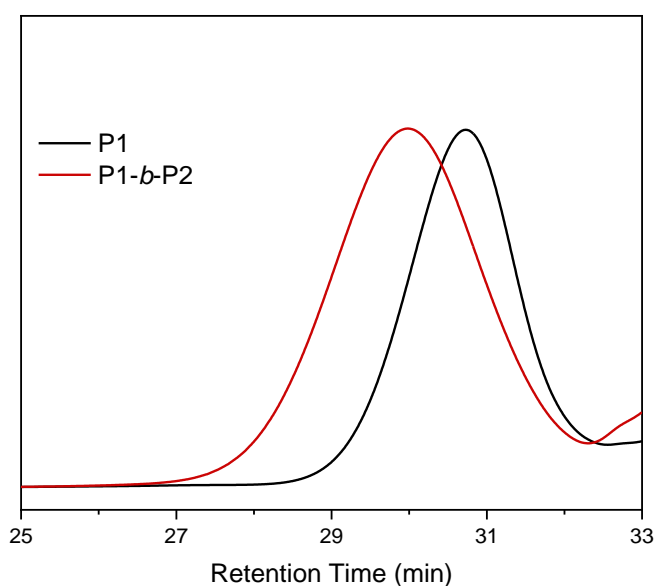

**Figure S18.** SEC traces for the synthesis of diblock copolymer **P1-b-P2**.

**Table S11.** Copolymerization of monomer **1** and vinyl monomers.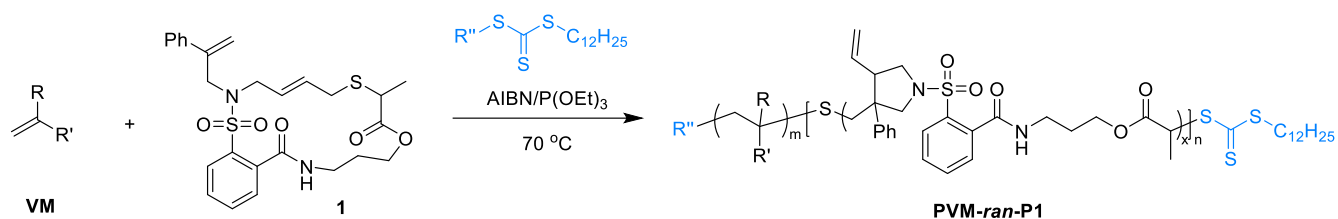

| Entry <sup>a</sup> | VM      | CTA  | [VM]/[1]/[P(OEt) <sub>3</sub> ]/[CTA]/[AIBN] | solvent | Conc. | Time | Conver. of VM <sup>b</sup> | Conver. of 1 <sup>b</sup> | M <sub>n,SEC</sub> <sup>c</sup> | Đ <sup>c</sup> |
|--------------------|---------|------|----------------------------------------------|---------|-------|------|----------------------------|---------------------------|---------------------------------|----------------|
| 1                  | MMA     | CTA1 | 300/0/0/1/0.27                               | benzene | 7.0 M | 10 h | 98%                        | /                         | 22000                           | 1.18           |
| 2                  | MMA     | CTA1 | 300/3/3.6/1/0.27                             | benzene | 7.0 M | 10 h | >99%                       | 60%                       | 27600                           | 1.22           |
| 3                  | styrene | CTA2 | 1000/0/0/1/0.2                               | /       | bulk  | 20 h | 34%                        | /                         | 34400                           | 1.15           |
| 4                  | styrene | CTA2 | 1000/10/12/1/0.2                             | /       | bulk  | 20 h | 47%                        | 14%                       | 26400                           | 1.15           |

<sup>a</sup> Experimental conditions: [VM]/[1]=100/1, reacted at 70°C under a nitrogen atmosphere, unless otherwise noted. <sup>b</sup> Monomer conversion was determined by <sup>1</sup>H NMR spectroscopy. <sup>c</sup> Molecular weight and polydispersity index (Đ) were determined by SEC analysis calibrated to polystyrene standards.

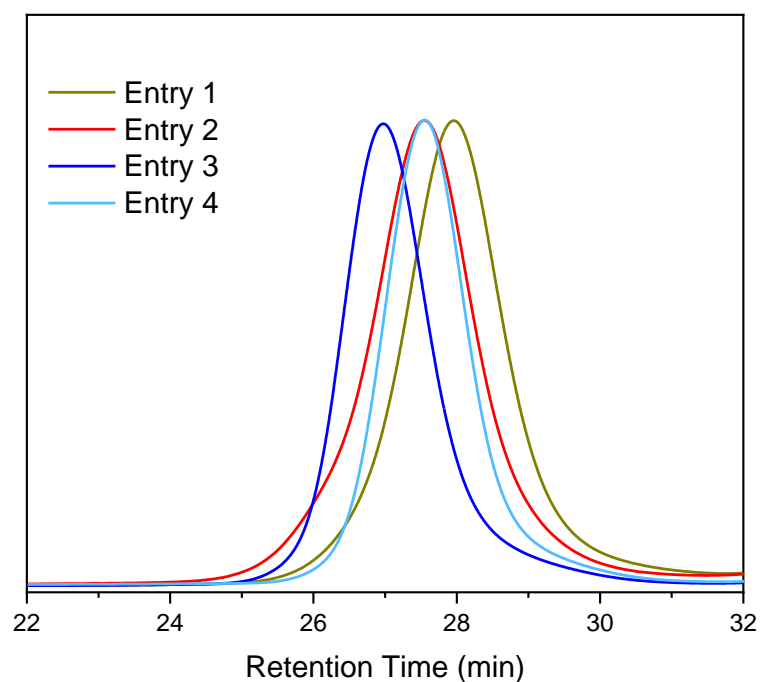**Figure S19.** SEC traces for copolymerization of monomer **1** and vinyl monomers.

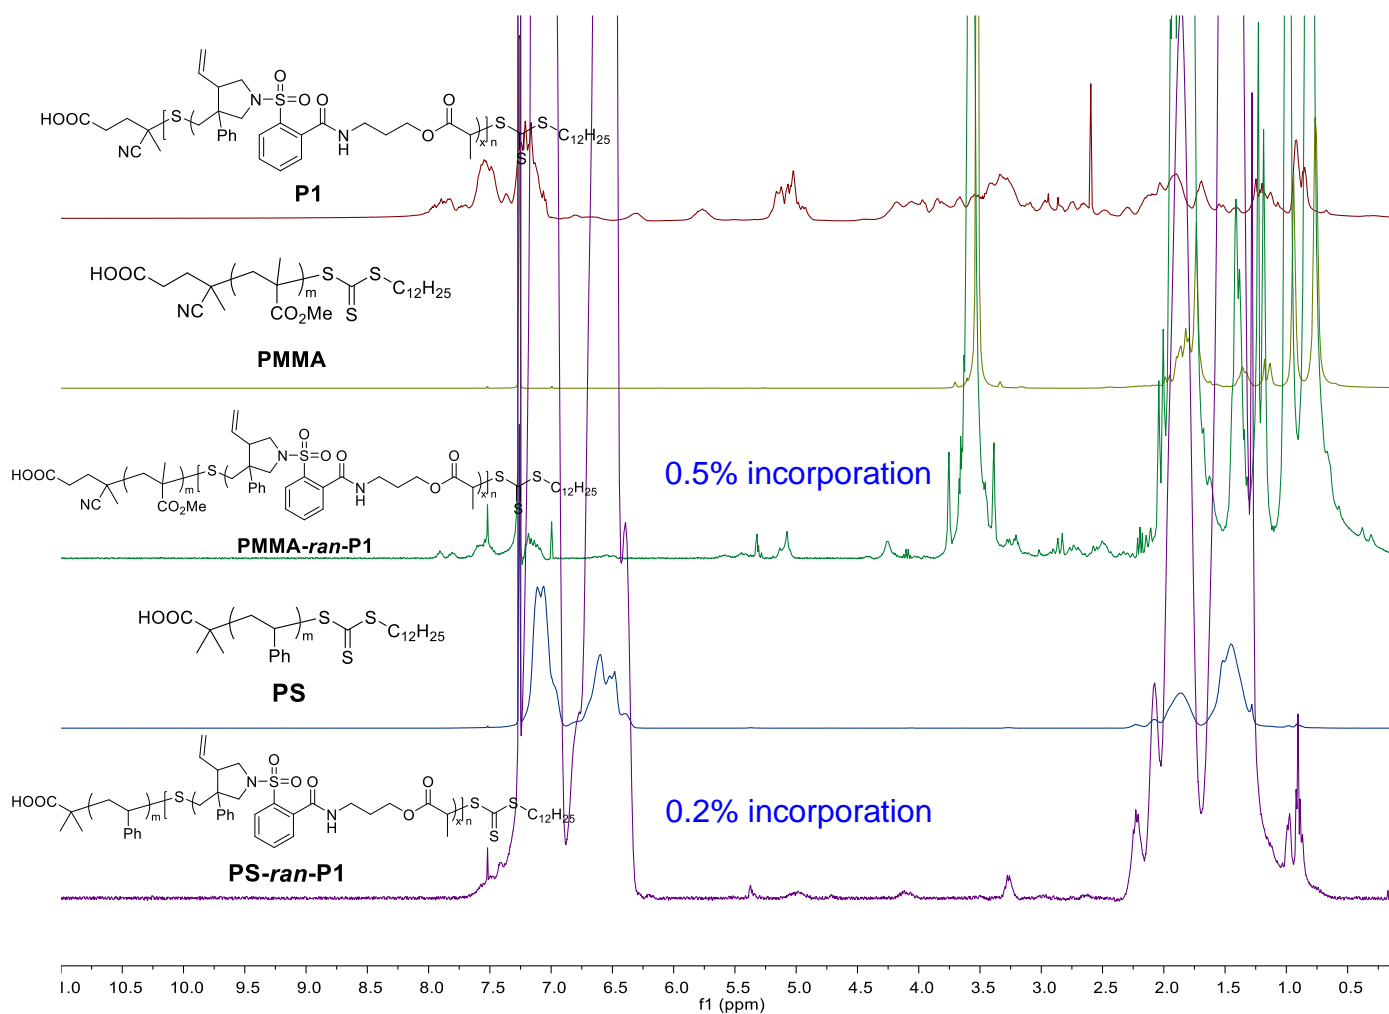

**Figure S20.** <sup>1</sup>H NMR analysis of the vinyl copolymers.

### (1) Initiation

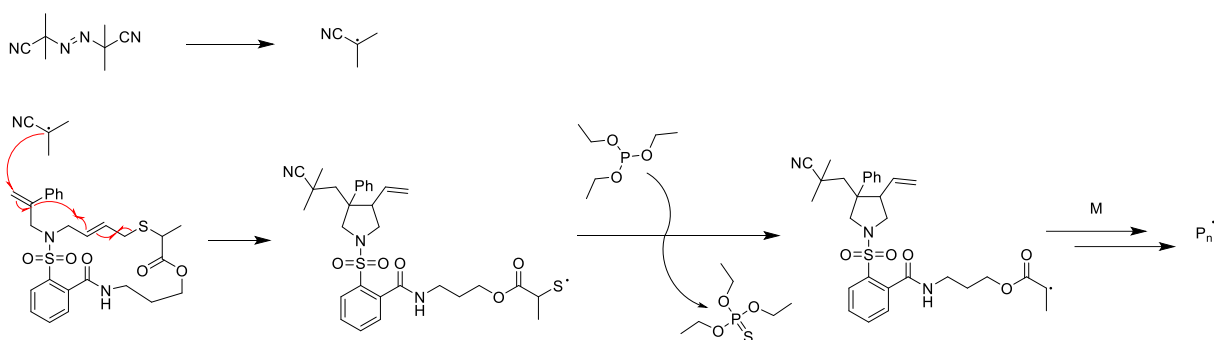

### (2) Chain transfer to CTA

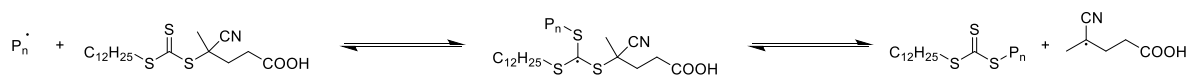

### (3) Reinitiation

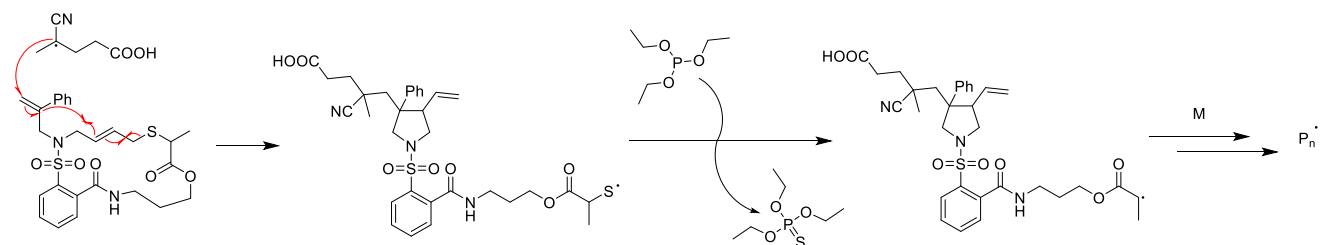

### (4) Degenerative chain transfer propagation

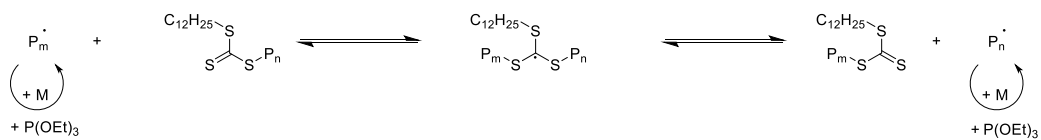

### (5) Termination

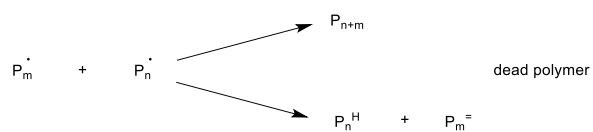

Figure S21. Proposed mechanism for the polymerization.

**Table S12.** Computed results for the chain-growth process.

|                       | Thermal correction to G (Hartree) | Single point energy (Hartree) | Imaginary frequency |
|-----------------------|-----------------------------------|-------------------------------|---------------------|
| Int0                  | 0.075222                          | -705.126967211734             |                     |
| P(OEt) <sub>3</sub>   | 0.171681                          | -804.573284659005             |                     |
| TS1                   | 0.271511                          | -1509.714552278729            | 355.0311i           |
| S=P(OEt) <sub>3</sub> | 0.174810                          | -1202.790225324309            |                     |
| Int1                  | 0.071641                          | -306.960052554172             |                     |
| M                     | 0.466253                          | -2290.305800850286            |                     |
| TS2                   | 0.559666                          | -2597.263820661758            | 527.1335i           |
| Int2                  | 0.563335                          | -2597.307111852610            |                     |
| TS3                   | 0.566053                          | -2597.283789955884            | 600.5732i           |
| Int3                  | 0.568756                          | -2597.315336851205            |                     |
| TS4                   | 0.568463                          | -2597.299429094894            | 267.5393i           |
| Int4                  | 0.565929                          | -2597.304332031877            |                     |
| TS5                   | 0.562047                          | -2995.441233371177            | 149.3291i           |
| Int5                  | 0.561612                          | -2995.460238695563            |                     |
| TS6                   | 0.563570                          | -2995.438773740694            | 571.8135i           |
| Int6                  | 0.568007                          | -2995.466551546289            |                     |
| TS7                   | 0.566904                          | -2995.453310178335            | 272.7202i           |
| Int7                  | 0.563275                          | -2995.459178247476            |                     |
| CTA                   | 0.140975                          | -1618.755142037458            |                     |
| TS8                   | 0.234994                          | -1925.719465481299            | 280.3348i           |
| Int8                  | 0.240041                          | -1925.750304322839            |                     |

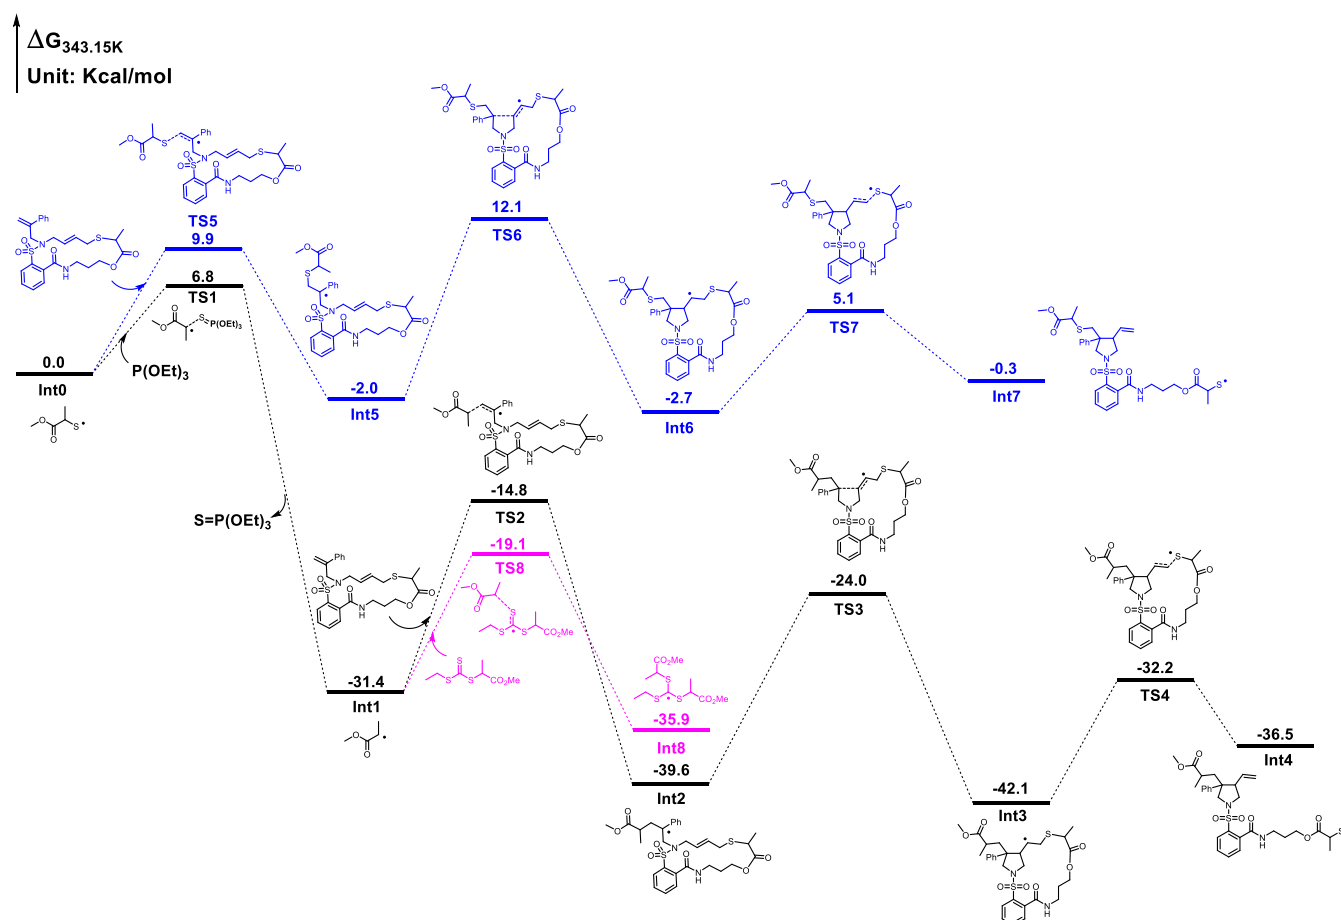

**Figure S22.** Calculated free energy profiles for the chain-growth process.

## References

- 1 S. Zhang, C. Cao, S. Jiang and H. Huang, *Macromolecules*, 2022, **55**, 9411–9419.
- 2 S. Zhang, Y. Wang, H. Huang and D. Cao, *Angew. Chem. Int. Ed.*, 2023, **62**, e202308524.

# NMR spectra

## NMR of S1

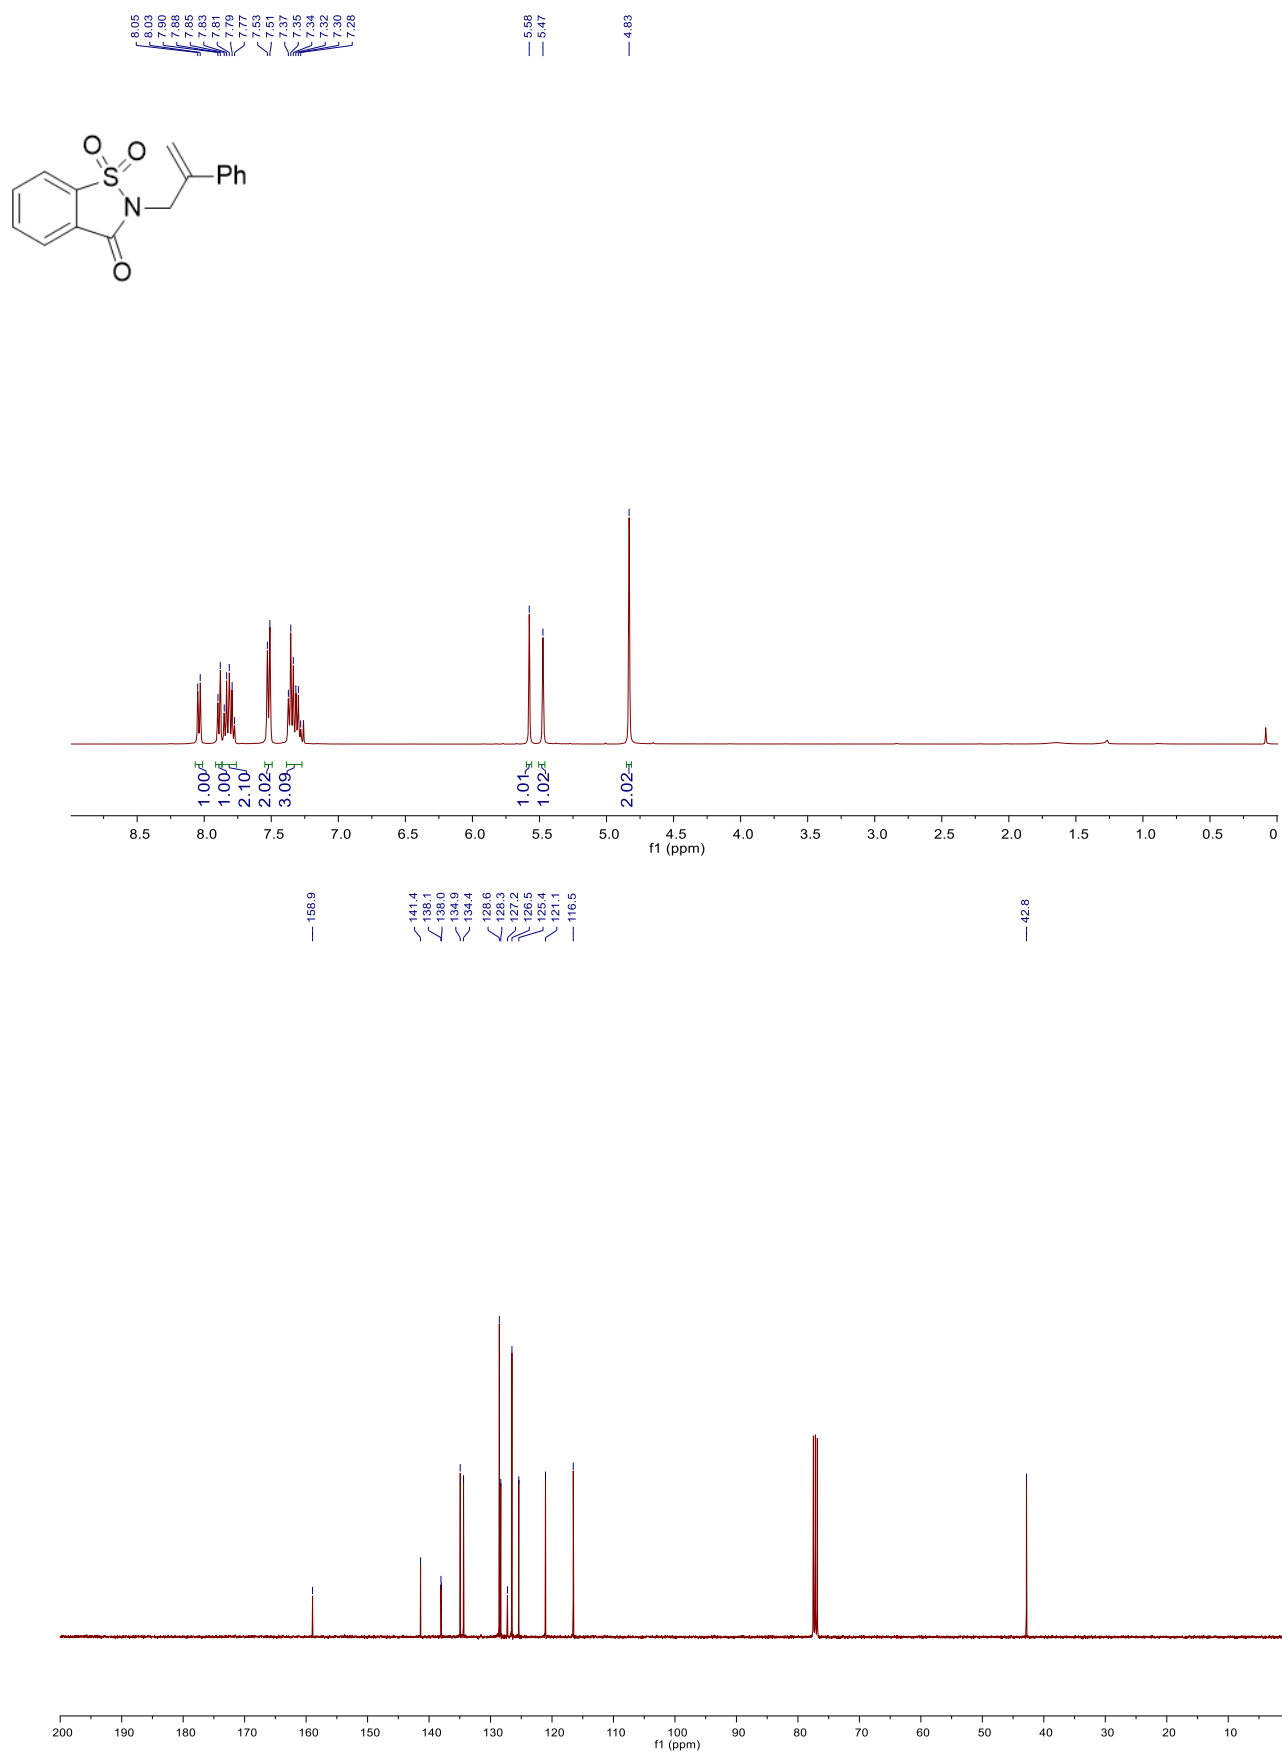

# NMR of S2

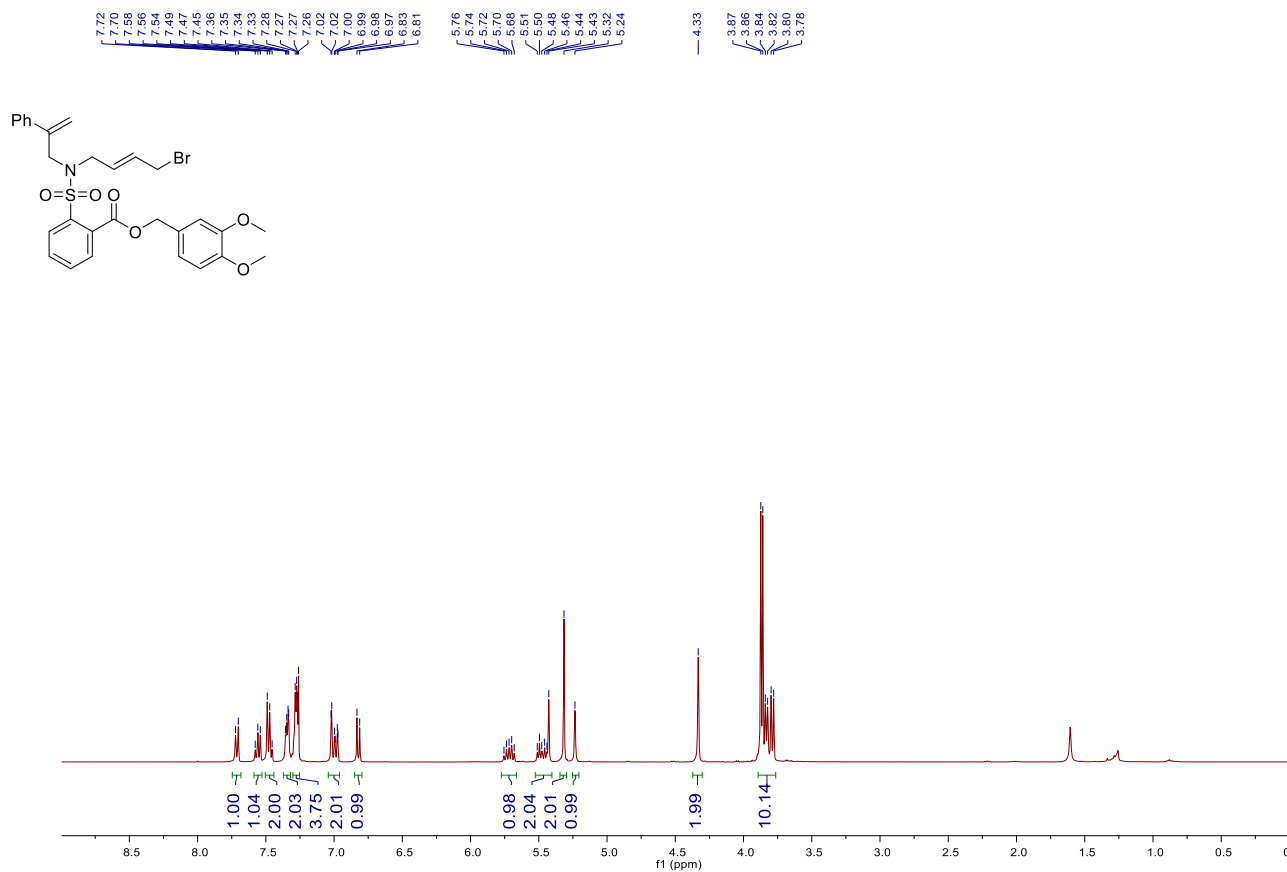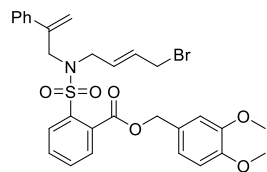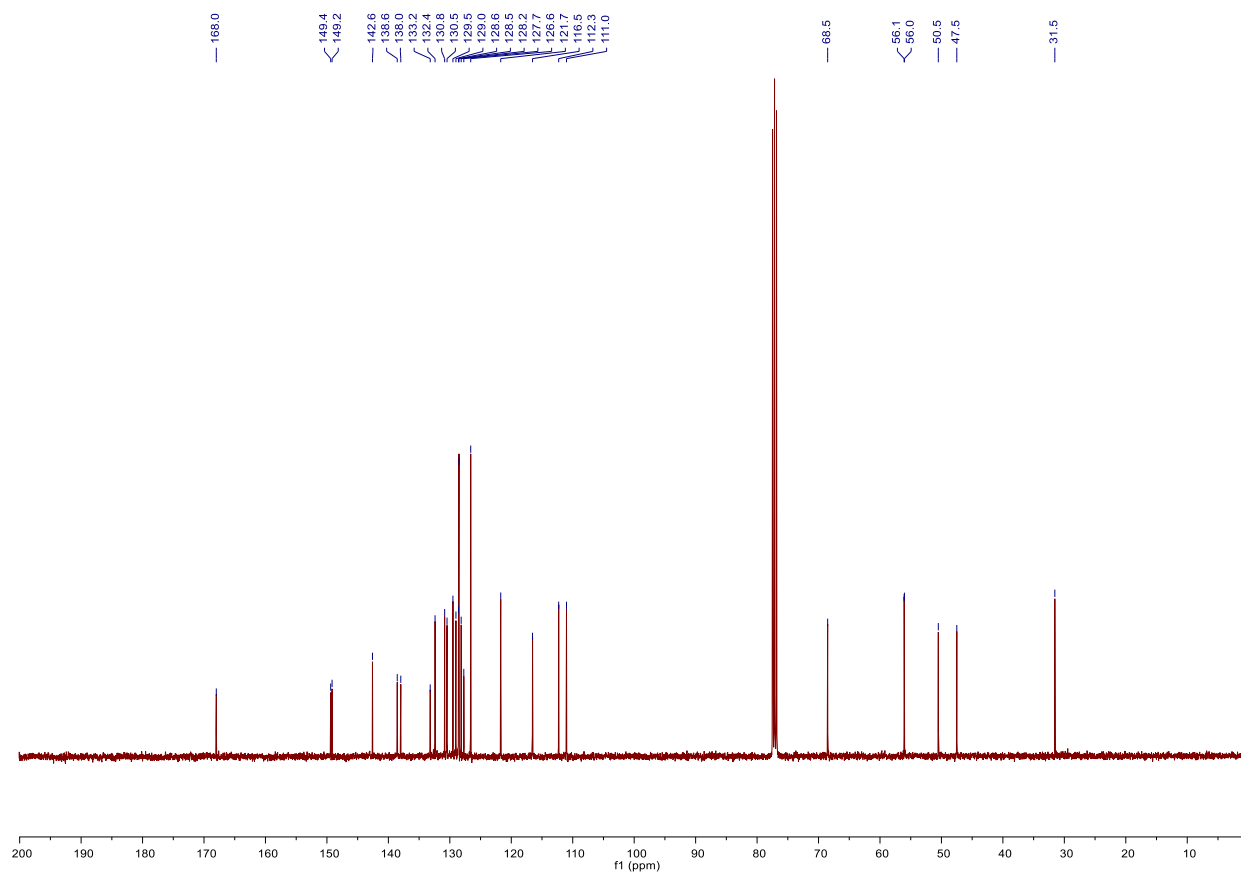



# NMR of S3

7.74, 7.72, 7.57, 7.55, 7.49, 7.48, 7.47, 7.47, 7.46, 7.35, 7.34, 7.33, 7.29, 7.28, 7.27, 7.27, 7.26, 7.02, 6.99, 6.99, 6.97, 6.97, 6.93, 6.80, 5.55, 5.53, 5.53, 5.49, 5.49, 5.48, 5.43, 5.38, 5.36, 5.35, 5.33, 5.31, 5.29, 5.23, 4.37, 4.33, 4.32, 4.28, 3.87, 3.85, 3.83, 3.82, 3.27, 3.25, 3.24, 3.22, 3.20, 3.18, 3.08, 3.06, 3.04, 1.37, 1.36

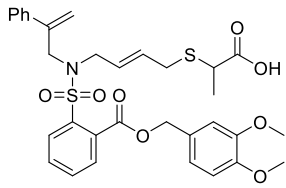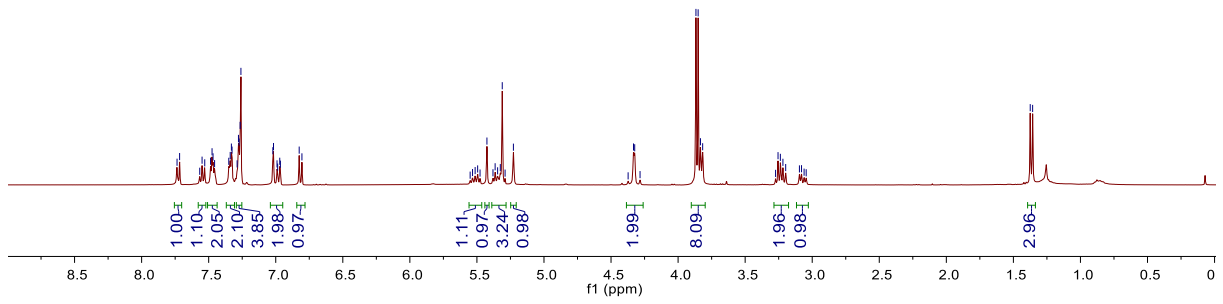

178.1, 168.2, 148.4, 148.1, 145.6, 136.6, 136.1, 133.1, 132.4, 130.4, 130.3, 128.6, 128.5, 128.1, 127.8, 127.7, 126.5, 126.2, 116.2, 112.3, 111.0, 88.6, 56.1, 56.0, 50.2, 47.8, 39.7, 33.3, 16.7

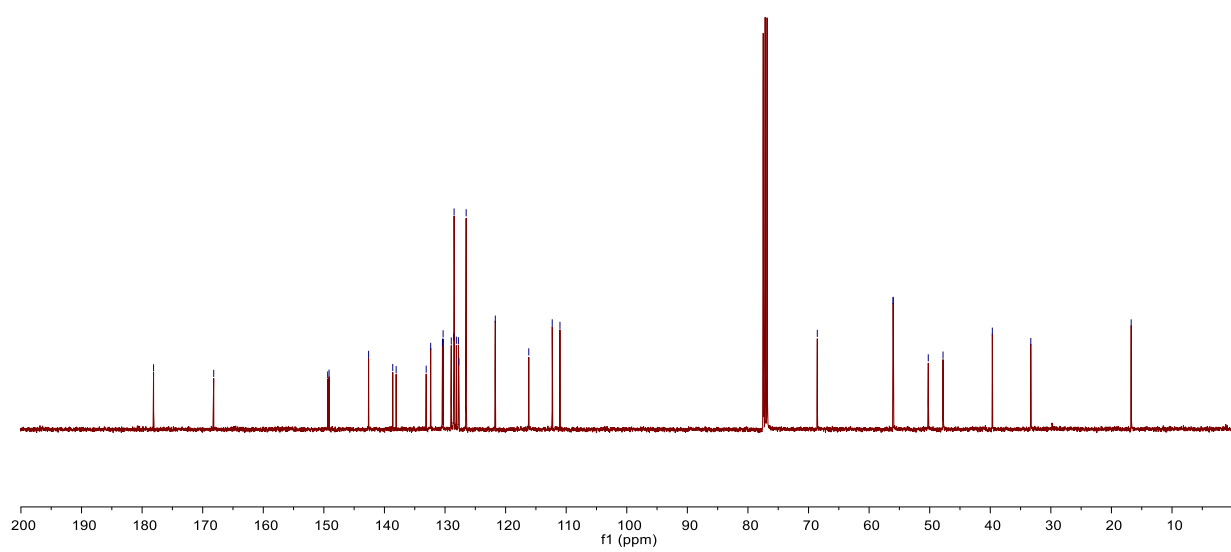

# NMR of 1

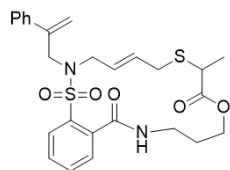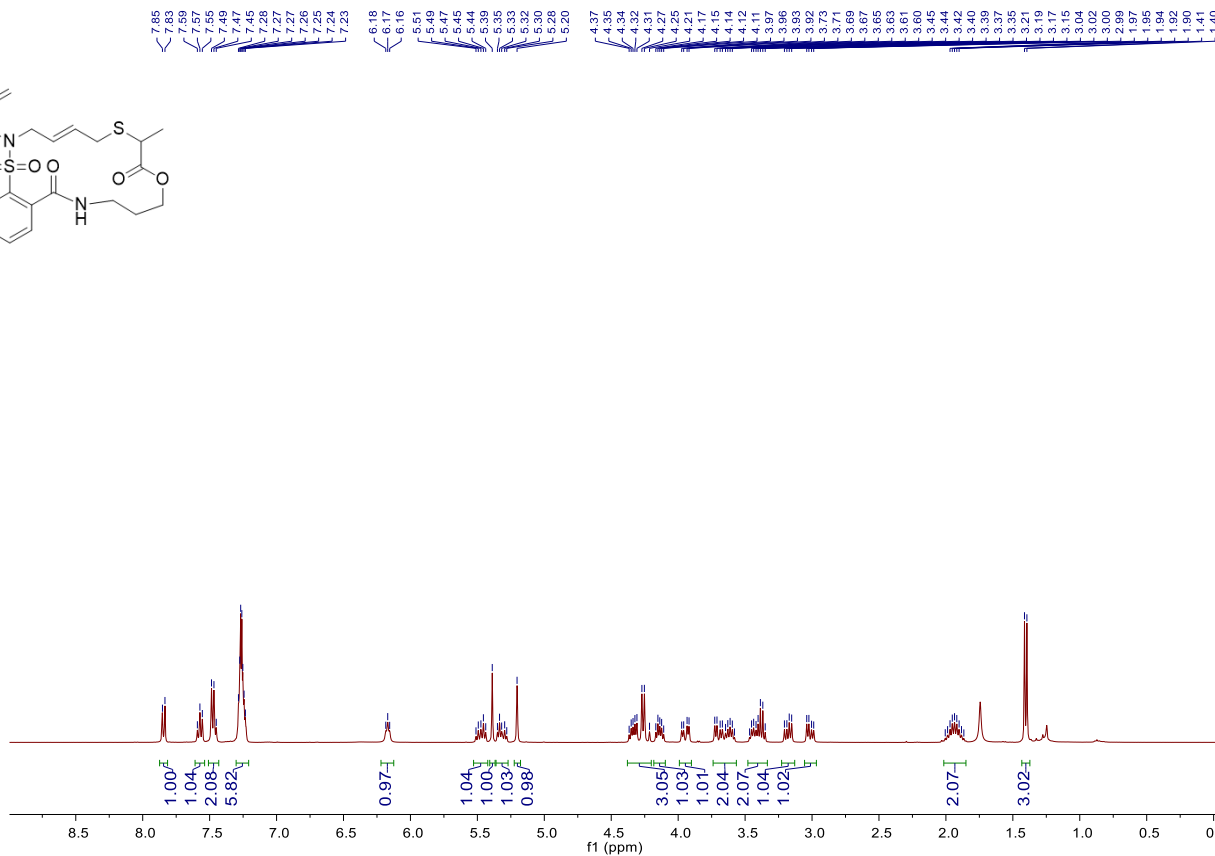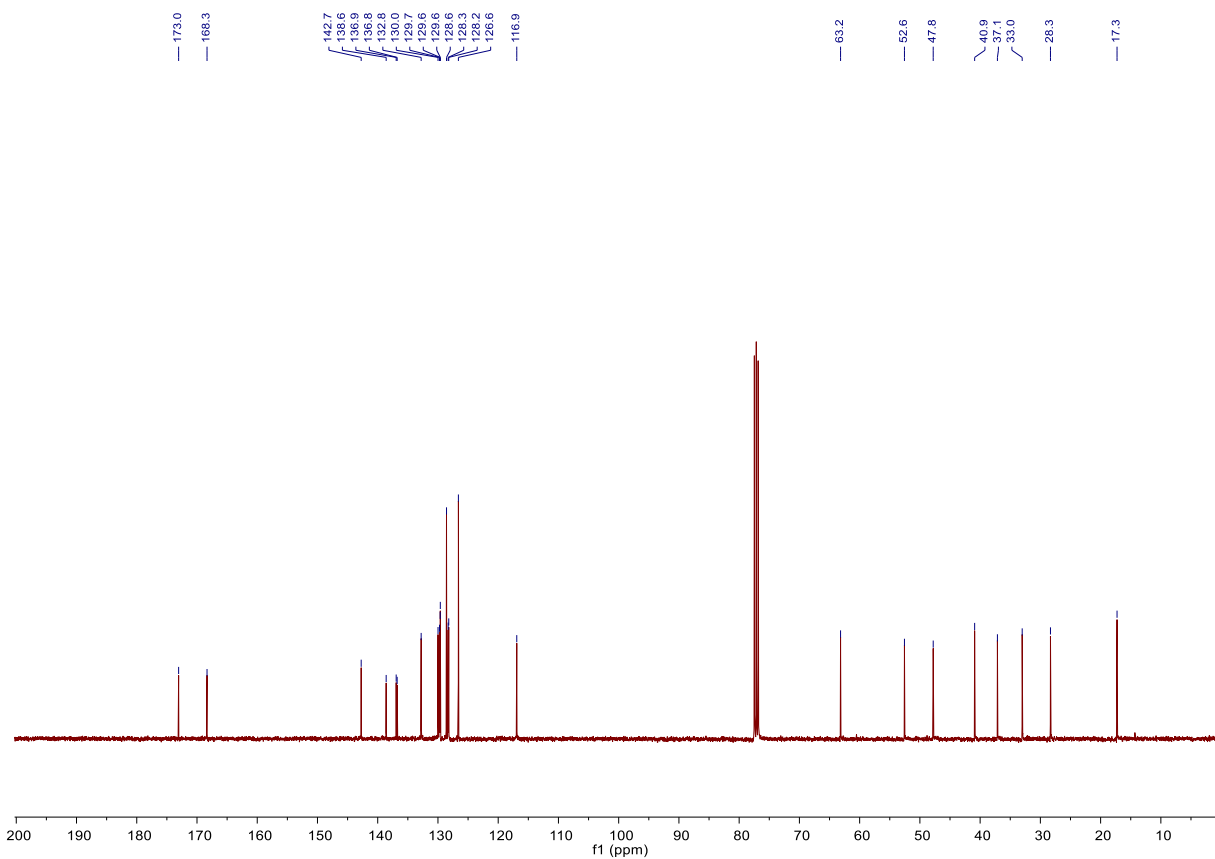

# NMR of 2

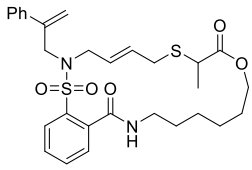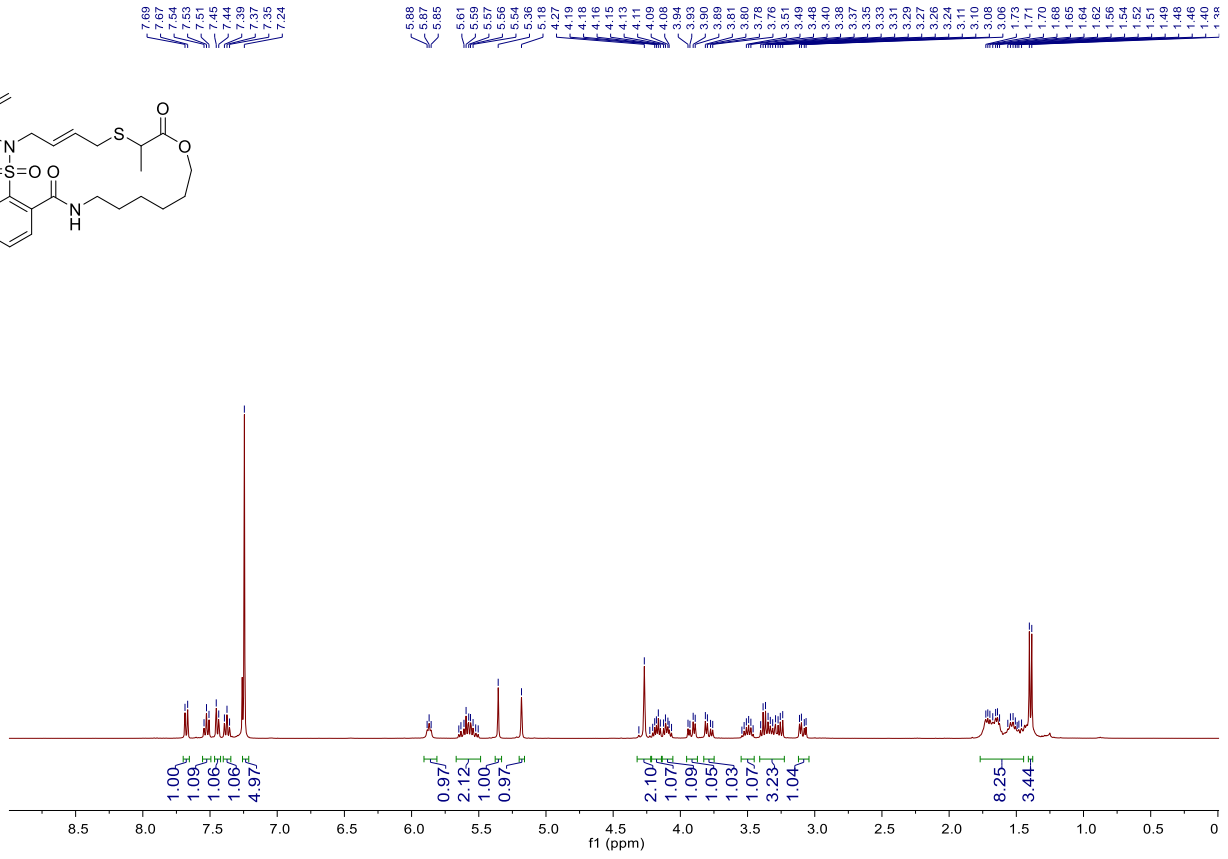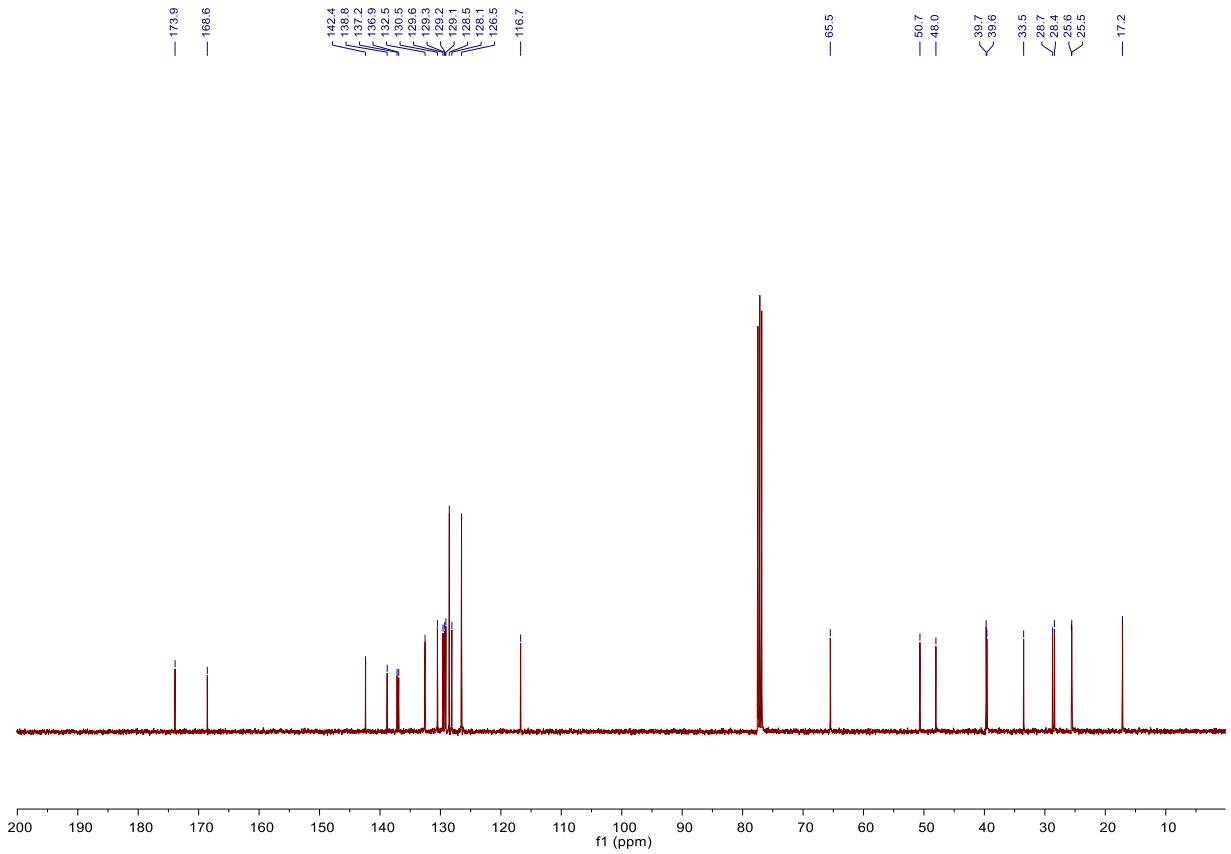

# NMR of 3

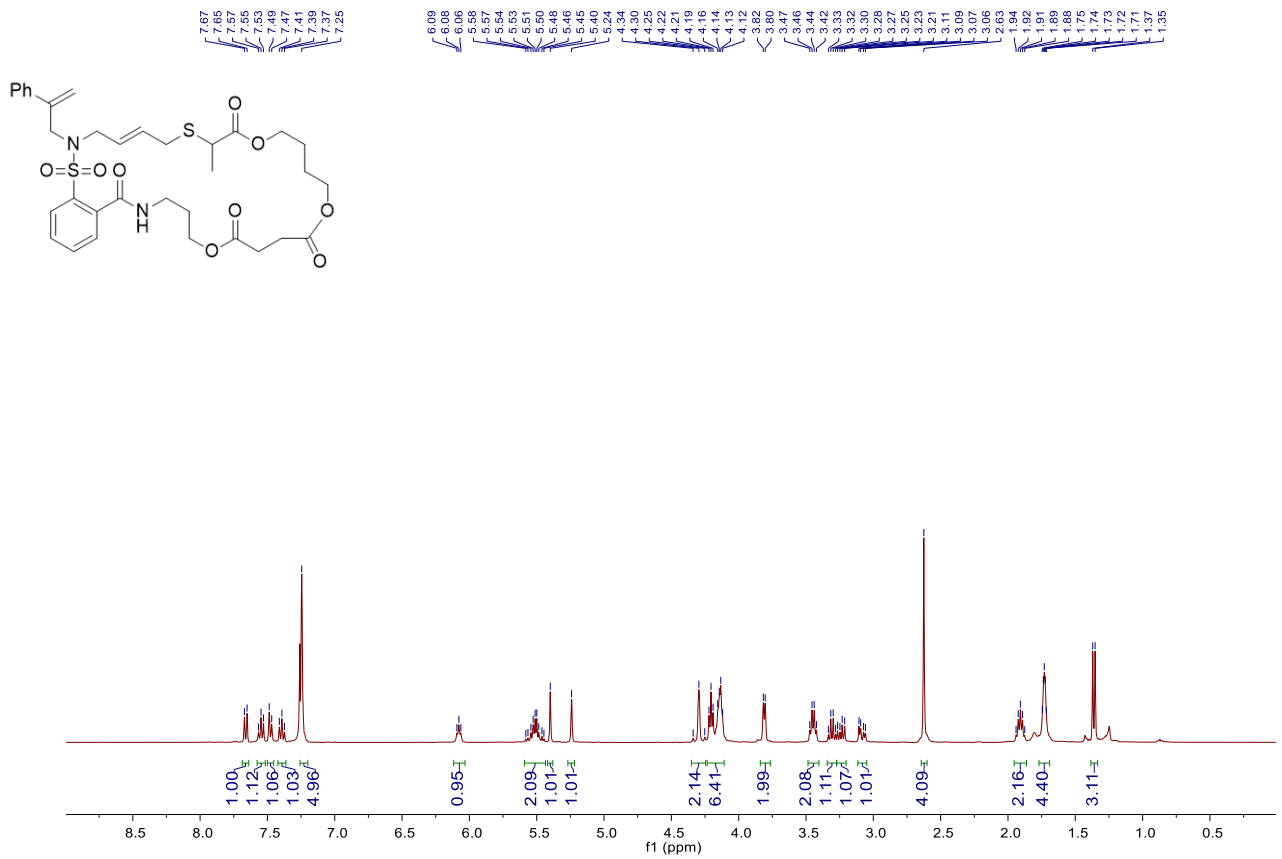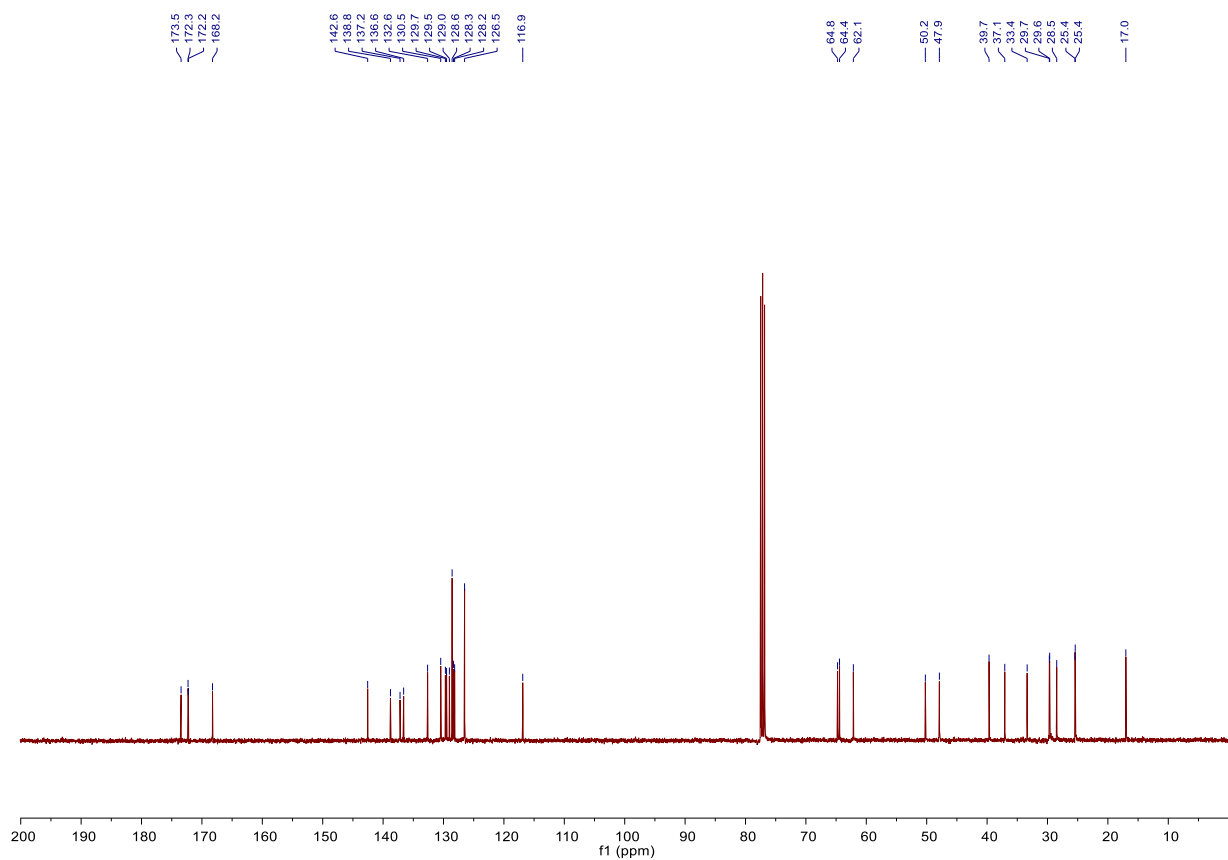

# NMR of P1

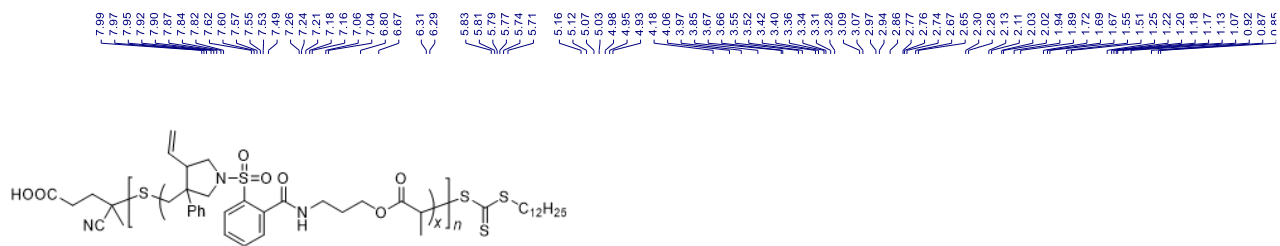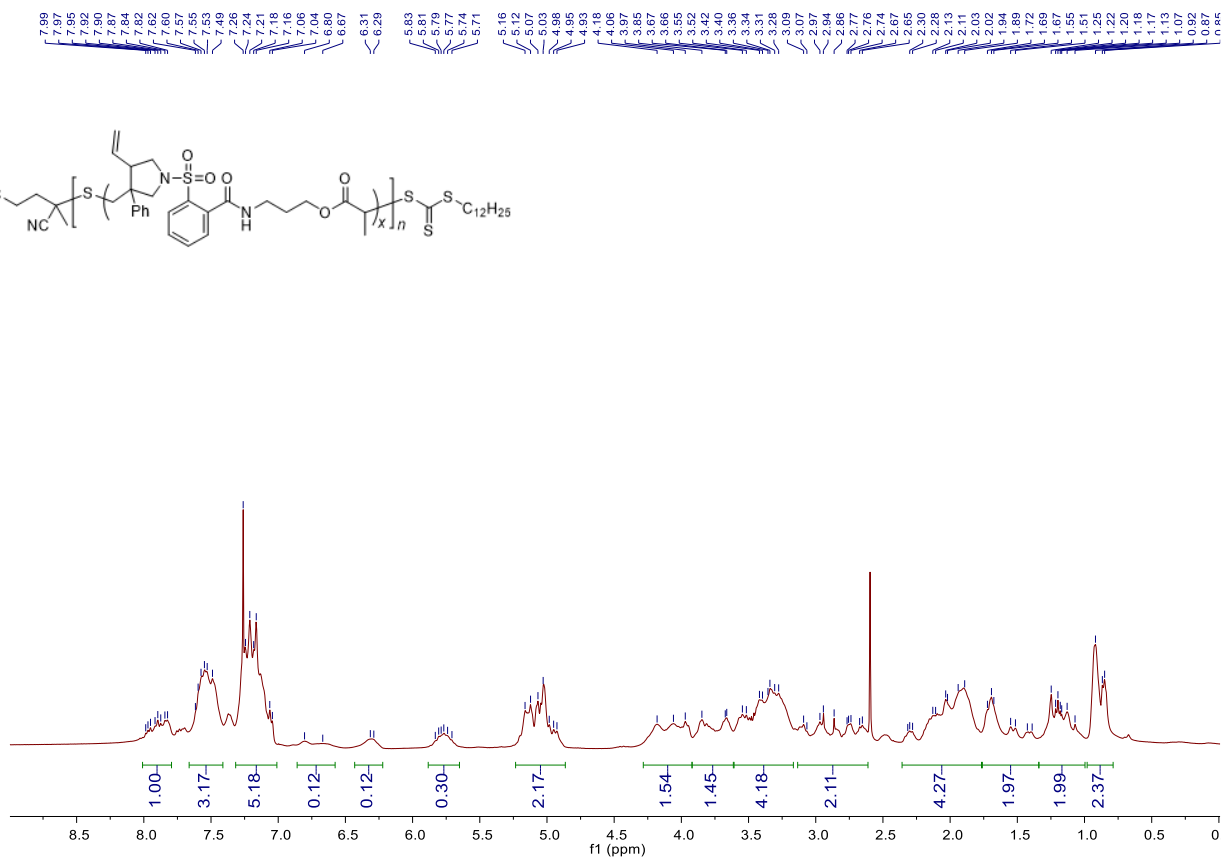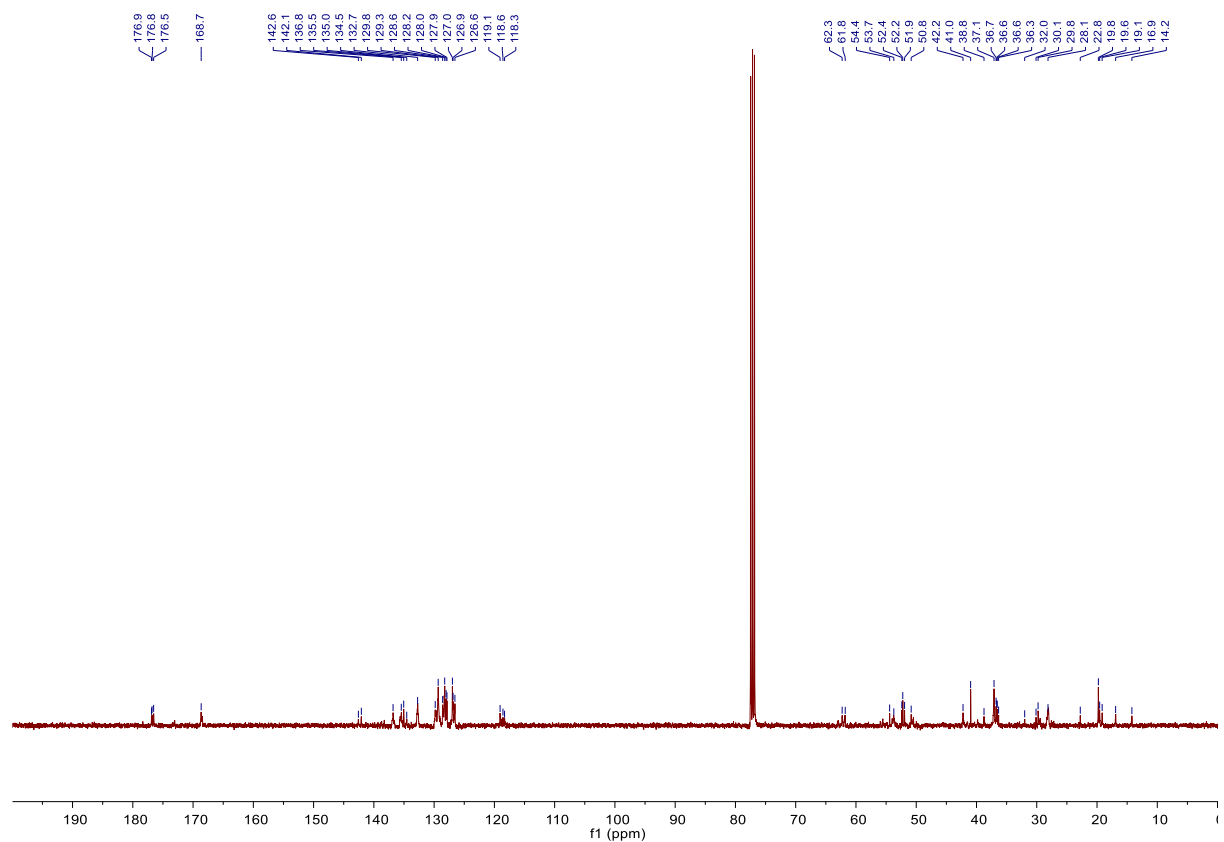

# NMR of P2

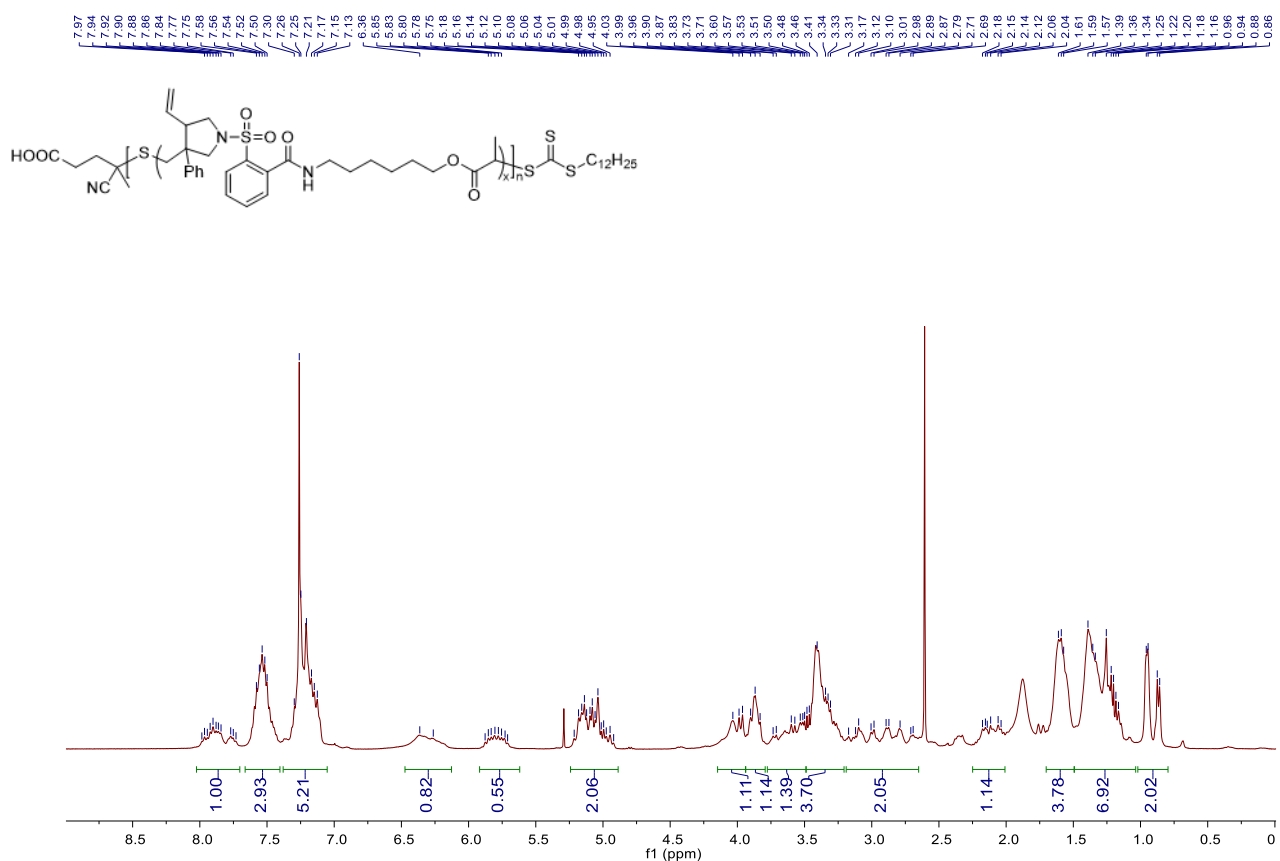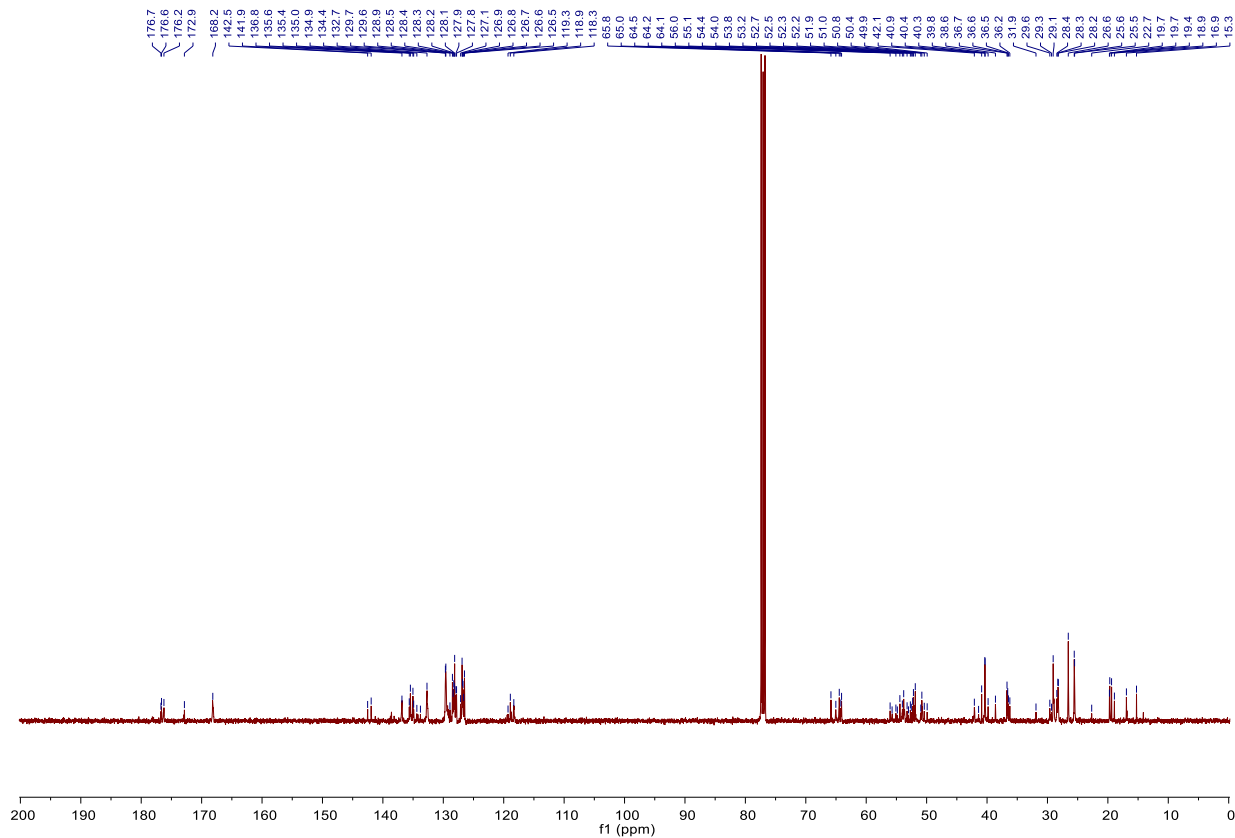

# NMR of P3

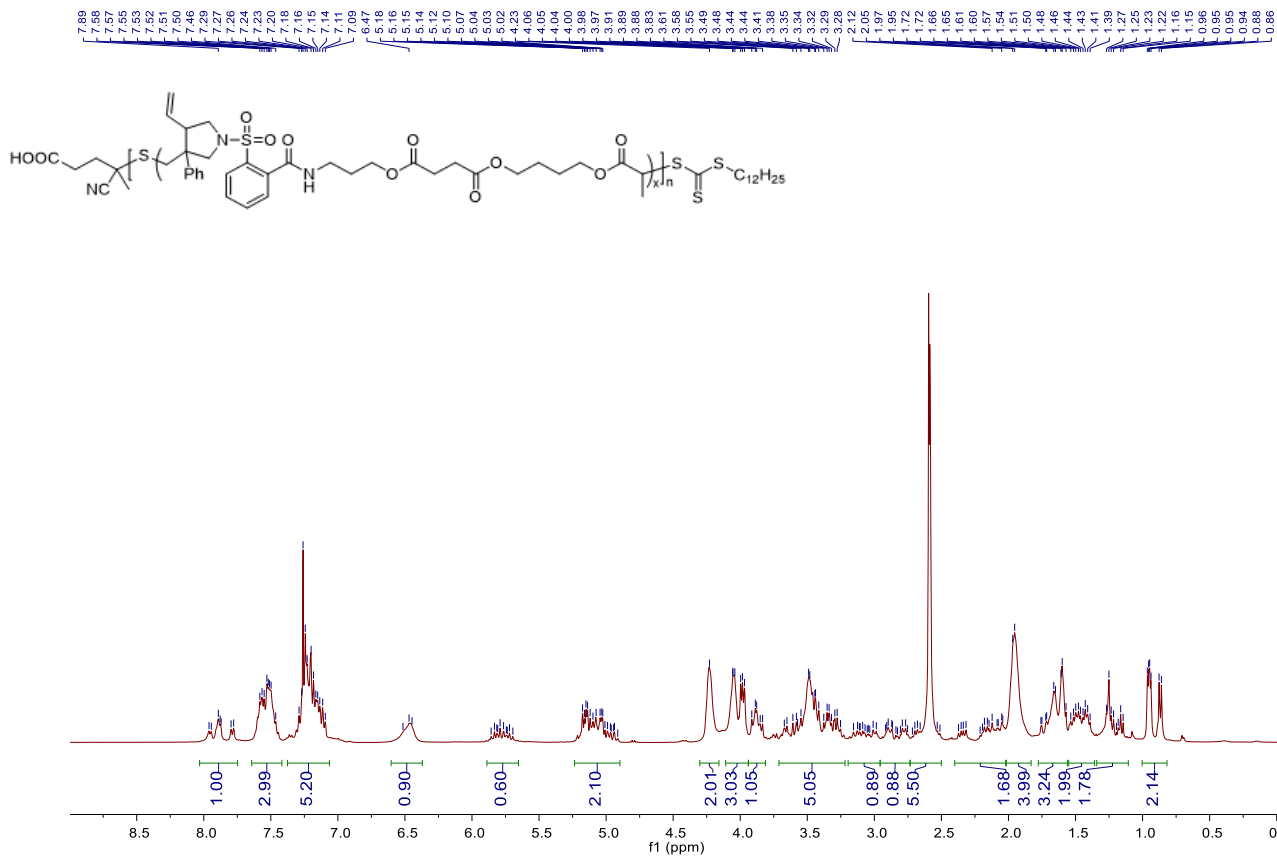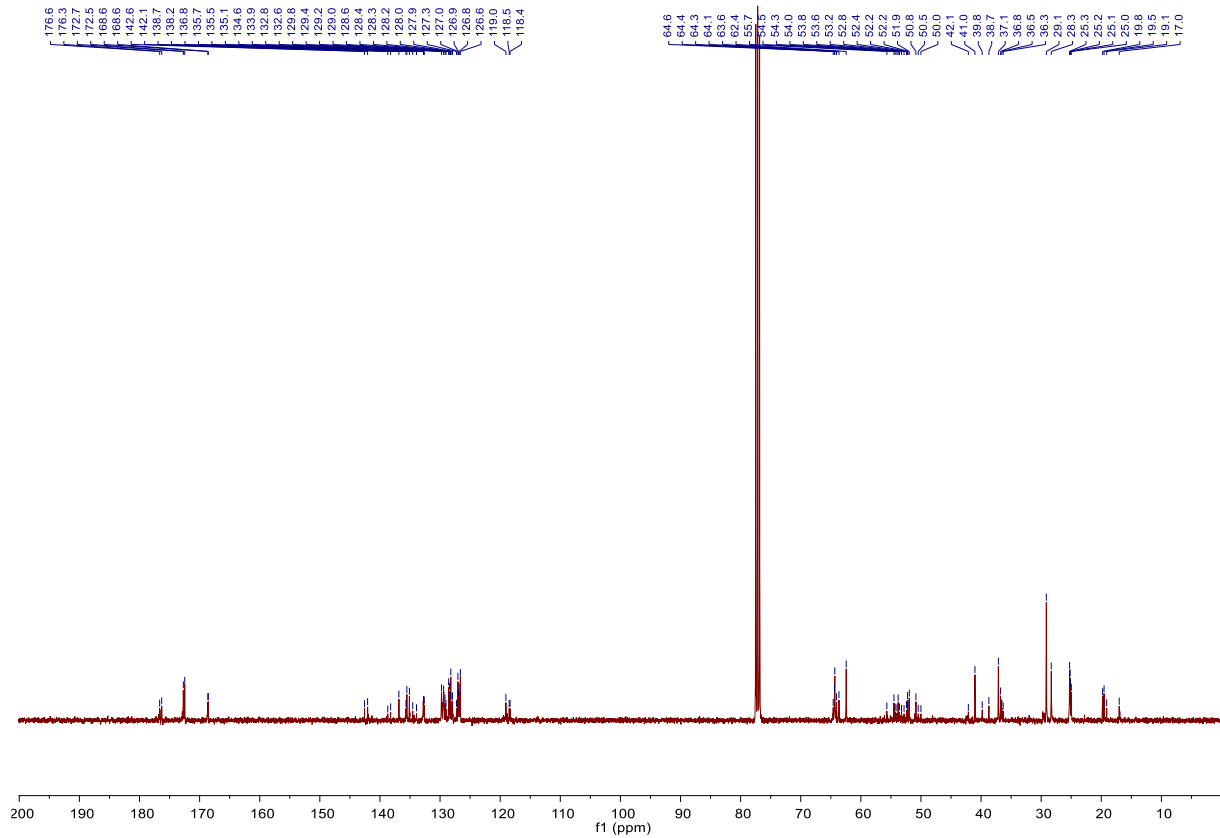

# NMR of P1-b-P2

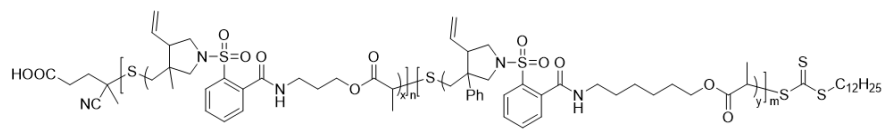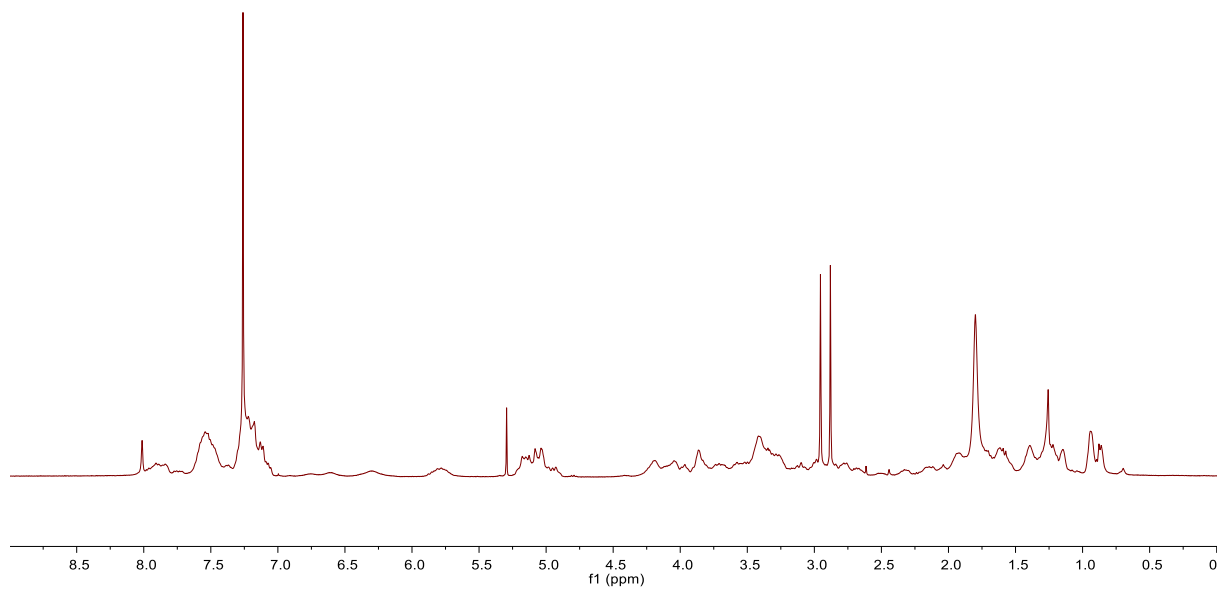



## Cartesian coordinates of all optimized structures

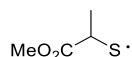

### Int0

|   |             |             |             |
|---|-------------|-------------|-------------|
| C | -2.23961400 | 0.23358800  | -0.17348500 |
| O | -0.90696200 | -0.16241100 | 0.13775600  |
| C | 1.39036400  | 0.26442300  | 0.44627800  |
| S | 2.05937600  | -0.46544500 | -1.07477700 |
| H | 2.03485900  | 1.13799300  | 0.63759100  |
| C | 0.00541100  | 0.80738600  | 0.15562900  |
| H | -2.28599400 | 0.66973900  | -1.18059800 |
| H | -2.60421100 | 0.96987500  | 0.55512400  |
| O | -0.24656600 | 1.96355700  | -0.05874500 |
| C | 1.43357400  | -0.70485700 | 1.62187000  |
| H | 2.47117300  | -0.99862600 | 1.82664200  |
| H | 1.01687900  | -0.22438400 | 2.51940400  |
| H | 0.84456800  | -1.60556300 | 1.40399500  |
| H | -2.84944800 | -0.67422200 | -0.12851900 |

### P(OEt)<sub>3</sub>

|   |             |             |             |
|---|-------------|-------------|-------------|
| P | 0.14381500  | -0.06027900 | 0.50759000  |
| O | 1.52349200  | -0.69971400 | -0.10320500 |
| O | -0.80201900 | -1.23668900 | -0.12681500 |
| O | -0.11980300 | 1.15603600  | -0.57611800 |
| C | 2.71800300  | 0.04878500  | 0.09999000  |
| C | 3.90533800  | -0.84771300 | -0.15964400 |
| H | 2.75006400  | 0.44248600  | 1.13237300  |
| H | 2.72770900  | 0.91492700  | -0.58286300 |
| H | 4.84065500  | -0.28622000 | -0.02685300 |
| H | 3.90458600  | -1.69875600 | 0.53609000  |
| H | 3.87437800  | -1.23667100 | -1.18740600 |
| C | -2.20528200 | -1.12927100 | 0.09043700  |
| C | -2.84250100 | -2.47375200 | -0.17040300 |
| H | -2.62253600 | -0.36395400 | -0.58549500 |
| H | -2.40663900 | -0.80198300 | 1.12668400  |
| H | -3.93035100 | -2.41174500 | -0.02739700 |
| H | -2.64359000 | -2.79851400 | -1.20164900 |
| H | -2.43996600 | -3.23028600 | 0.51800700  |
| C | -0.40415500 | 2.46641800  | -0.09164600 |
| C | -1.89432300 | 2.69448100  | 0.03908500  |
| H | 0.03763100  | 3.17050700  | -0.81109400 |
| H | 0.09655000  | 2.63114700  | 0.87838200  |
| H | -2.09680500 | 3.72896600  | 0.35243600  |

|   |             |            |             |
|---|-------------|------------|-------------|
| H | -2.39683000 | 2.51751300 | -0.92305600 |
| H | -2.32790600 | 2.01601600 | 0.79018700  |

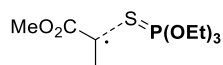

**TS1**

|   |             |             |             |
|---|-------------|-------------|-------------|
| C | 3.75060000  | 0.67038200  | 0.58570800  |
| O | 2.77923600  | -0.28573500 | 0.18723700  |
| C | 1.46085700  | -1.34669400 | -1.44359300 |
| S | -0.16014700 | -0.15394500 | -1.54171300 |
| H | 1.55198100  | -1.68309600 | -2.48343800 |
| C | 2.57741700  | -0.41258400 | -1.13357900 |
| H | 3.44974100  | 1.68220100  | 0.27780900  |
| H | 4.72928900  | 0.44143400  | 0.14215700  |
| O | 3.21408600  | 0.20825900  | -1.95072600 |
| P | -1.63934300 | 0.22829900  | -0.02799400 |
| O | -2.78076400 | -0.89816400 | 0.03819300  |
| O | -0.85633000 | -0.01650800 | 1.35801500  |
| O | -2.46872800 | 1.56538100  | 0.39866900  |
| C | -2.58710100 | -2.28328400 | -0.28417900 |
| C | -2.13617900 | -3.06449600 | 0.92896600  |
| H | -1.86753200 | -2.36578900 | -1.11297400 |
| H | -3.56132900 | -2.63903500 | -0.64431300 |
| H | -2.03115100 | -4.12712400 | 0.66629000  |
| H | -1.16812900 | -2.69750000 | 1.29646100  |
| H | -2.87432700 | -2.97718300 | 1.73891200  |
| C | 0.16392100  | 0.90639500  | 1.76915700  |
| C | 0.98183700  | 0.26431000  | 2.86135100  |
| H | -0.32408300 | 1.82769200  | 2.12231400  |
| H | 0.79681900  | 1.15443300  | 0.90173900  |
| H | 1.72429300  | 0.98236500  | 3.23747400  |
| H | 0.33726300  | -0.03715400 | 3.69946900  |
| H | 1.51145700  | -0.61906900 | 2.47753600  |
| C | -3.14314700 | 2.32586600  | -0.61509900 |
| C | -2.22992500 | 3.38070800  | -1.19681000 |
| H | -4.01238500 | 2.77740200  | -0.11905600 |
| H | -3.52063000 | 1.65057400  | -1.40006500 |
| H | -2.77509400 | 3.98743000  | -1.93368900 |
| H | -1.85485700 | 4.04499400  | -0.40525500 |
| H | -1.37079700 | 2.91147800  | -1.69929700 |
| C | 1.20332500  | -2.44959900 | -0.44648200 |
| H | 0.94619900  | -2.02285300 | 0.53315900  |
| H | 0.37138500  | -3.08387000 | -0.78338500 |

|   |            |             |             |
|---|------------|-------------|-------------|
| H | 2.09365000 | -3.08704100 | -0.32372100 |
| H | 3.81432500 | 0.61393600  | 1.67757400  |

S=P(OEt)<sub>3</sub>

|   |             |             |             |
|---|-------------|-------------|-------------|
| S | 0.33098400  | -0.63669500 | 1.80347300  |
| P | 0.05282500  | -0.19393700 | -0.06314300 |
| O | -0.63908100 | -1.32406500 | -0.95312600 |
| O | -0.86241900 | 1.08133200  | -0.36177700 |
| O | 1.35799800  | 0.15607000  | -0.91438600 |
| C | -1.64113300 | -2.21479300 | -0.43391600 |
| C | -2.93059000 | -1.49415600 | -0.11345400 |
| H | -1.23539000 | -2.72168800 | 0.45474700  |
| H | -1.78710600 | -2.96300600 | -1.22263700 |
| H | -3.69594300 | -2.22692100 | 0.17891300  |
| H | -2.79396100 | -0.79156100 | 0.72173300  |
| H | -3.29367100 | -0.93818400 | -0.98930100 |
| C | -0.60818900 | 2.32839600  | 0.30709400  |
| C | -1.54415000 | 3.36582500  | -0.25898500 |
| H | 0.44403400  | 2.61198600  | 0.14765300  |
| H | -0.76745400 | 2.18740500  | 1.38696900  |
| H | -1.37462500 | 4.32824200  | 0.24311700  |
| H | -1.37220800 | 3.49760300  | -1.33622400 |
| H | -2.59053500 | 3.06900600  | -0.10128500 |
| C | 2.56319500  | -0.62178200 | -0.79390900 |
| C | 3.60721100  | 0.15485700  | -0.02846000 |
| H | 2.89066700  | -0.83609900 | -1.81990400 |
| H | 2.34121800  | -1.58033000 | -0.30029600 |
| H | 4.54092100  | -0.42297400 | 0.02093100  |
| H | 3.81543200  | 1.11338900  | -0.52461500 |
| H | 3.26046500  | 0.35250600  | 0.99585600  |

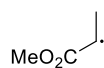

**Int1**

|   |             |             |             |
|---|-------------|-------------|-------------|
| C | 1.69751100  | 0.29099200  | -0.00026200 |
| O | 0.37734400  | -0.22945400 | -0.00020300 |
| C | -1.93896700 | 0.09386500  | -0.00002500 |
| H | -2.75620900 | 0.81658200  | 0.00005500  |
| C | -0.61233100 | 0.68105200  | -0.00013000 |
| H | 1.87686700  | 0.90587900  | 0.89290400  |
| H | 1.87686200  | 0.90568200  | -0.89356600 |
| O | -0.39678200 | 1.87735600  | -0.00012800 |

|   |             |             |             |
|---|-------------|-------------|-------------|
| C | -2.22934400 | -1.35683100 | 0.00000400  |
| H | -2.83539300 | -1.63009300 | 0.88062100  |
| H | -2.83575800 | -1.63005700 | -0.88037100 |
| H | -1.31334300 | -1.95816400 | -0.00019100 |
| H | 2.37150900  | -0.57207400 | -0.00017400 |

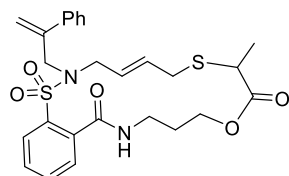

**M**

|   |             |             |             |
|---|-------------|-------------|-------------|
| C | 0.98849700  | -3.56631300 | -1.05717300 |
| C | -0.40908400 | -3.11533300 | -0.69473500 |
| N | -0.44135100 | -1.68455800 | -0.38369300 |
| S | -1.42171900 | -1.15213700 | 0.82638800  |
| O | -1.41870500 | -2.17461200 | 1.86497100  |
| O | -1.02345700 | 0.21105100  | 1.14595000  |
| C | -3.08769400 | -1.08787500 | 0.17460500  |
| C | -3.67447200 | 0.10418900  | -0.26539200 |
| C | -4.99457900 | 0.06025900  | -0.72878300 |
| C | -5.69716000 | -1.14164500 | -0.77361200 |
| C | -5.09532200 | -2.32233400 | -0.33886000 |
| C | -3.79134300 | -2.29483100 | 0.14634900  |
| C | -0.14975300 | -0.75163100 | -1.47296300 |
| C | 1.16549300  | -0.03389600 | -1.35128400 |
| C | 1.94986700  | -0.02924000 | -0.27290500 |
| C | 3.26836700  | 0.67941300  | -0.13078300 |
| H | -5.47121700 | 0.98555100  | -1.05911800 |
| H | -5.64503800 | -3.26400100 | -0.36248000 |
| H | -3.32192600 | -3.20487900 | 0.52314900  |
| H | -0.95681900 | -0.00363200 | -1.56632700 |
| H | -0.16805600 | -1.32804500 | -2.41147200 |
| H | 1.45652100  | 0.54480100  | -2.23567500 |
| H | 1.63422100  | -0.60169000 | 0.60538600  |
| H | 4.10057100  | -0.02671400 | -0.29112700 |
| C | -2.98106000 | 1.45240000  | -0.32375400 |
| O | -2.27952600 | 1.76147200  | -1.27542400 |
| N | -3.30175100 | 2.28868800  | 0.67603700  |
| H | -3.83349400 | 1.92387300  | 1.45958500  |
| H | -1.09274900 | -3.34212100 | -1.52948700 |
| H | -0.76044100 | -3.66433300 | 0.18904800  |
| H | -6.72356100 | -1.15385200 | -1.14323500 |

|   |             |             |             |
|---|-------------|-------------|-------------|
| H | 3.38682500  | 1.06000000  | 0.89478200  |
| S | 3.58516100  | 2.04508600  | -1.28714700 |
| C | 2.18183800  | 3.13314800  | -0.88317100 |
| O | 0.91912200  | 3.61935000  | 1.16129700  |
| C | -0.30668800 | 3.33929600  | 0.46927200  |
| C | -1.43176000 | 3.80282900  | 1.37374100  |
| H | -1.26882700 | 4.86609700  | 1.60917200  |
| H | -1.39532500 | 3.24540200  | 2.32253100  |
| C | -2.81449300 | 3.65439100  | 0.74319300  |
| H | -2.80922600 | 4.06354500  | -0.27789000 |
| H | 1.26422000  | 2.63103300  | -1.20657500 |
| H | -3.54335800 | 4.22902700  | 1.32830900  |
| C | 2.06643600  | -3.35458800 | -0.05314400 |
| C | 1.76941500  | -3.24833300 | 1.31429500  |
| C | 3.40331100  | -3.21077400 | -0.45773500 |
| C | 2.78070500  | -3.01804700 | 2.24733100  |
| H | 0.73703800  | -3.31423000 | 1.66115600  |
| C | 4.41287800  | -2.98186100 | 0.47436600  |
| H | 3.65246100  | -3.24781400 | -1.52004600 |
| C | 4.10549900  | -2.88273500 | 1.83309300  |
| H | 2.52771600  | -2.93590700 | 3.30610200  |
| H | 5.44421300  | -2.86461000 | 0.13601300  |
| H | 4.89444700  | -2.69390000 | 2.56326000  |
| H | -0.37346100 | 2.26114200  | 0.26600800  |
| H | -0.34224900 | 3.89153400  | -0.48221500 |
| C | 2.12332700  | 3.44799700  | 0.61056700  |
| O | 3.10282200  | 3.60971500  | 1.28803800  |
| C | 1.21198900  | -4.13706500 | -2.24834200 |
| H | 2.19304300  | -4.52780800 | -2.52762300 |
| H | 0.40158300  | -4.24810700 | -2.97313800 |
| C | 2.34632800  | 4.44651000  | -1.65105600 |
| H | 3.26681900  | 4.95991200  | -1.33909200 |
| H | 2.39500600  | 4.25159200  | -2.73134400 |
| H | 1.49242100  | 5.11262700  | -1.45929900 |

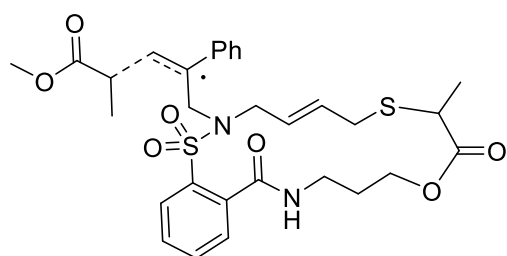

**TS2**

|   |             |             |             |
|---|-------------|-------------|-------------|
| C | -2.64497600 | -0.79848600 | 0.10887200  |
| C | -2.05544600 | 0.56528300  | 0.37817400  |
| N | -0.59168600 | 0.52863400  | 0.28279800  |
| S | 0.30152400  | 1.46938900  | 1.29475900  |
| O | -0.39692400 | 1.50930700  | 2.57367300  |
| O | 1.67734800  | 0.99758600  | 1.23261200  |
| C | 0.27388500  | 3.13485800  | 0.64000000  |
| C | 1.33022100  | 3.65883100  | -0.11417700 |
| C | 1.23118800  | 4.98112600  | -0.56233700 |
| C | 0.10123200  | 5.74720500  | -0.28559200 |
| C | -0.94655500 | 5.20743900  | 0.46027000  |
| C | -0.85696600 | 3.90179500  | 0.93336000  |
| C | -0.01134700 | 0.20333600  | -1.02094400 |
| C | 0.62299100  | -1.15705200 | -1.10250700 |
| C | 0.88074200  | -1.95311100 | -0.06421900 |
| C | 1.51117700  | -3.31702300 | -0.12048000 |
| H | 2.05507200  | 5.40822000  | -1.13792100 |
| H | -1.82913300 | 5.80658300  | 0.68754700  |
| H | -1.65477800 | 3.47958700  | 1.54670200  |
| H | 0.73569500  | 0.96308400  | -1.31087200 |
| H | -0.81765600 | 0.27856600  | -1.76752300 |
| H | 0.90951200  | -1.47266500 | -2.11253300 |
| H | 0.60147900  | -1.61074000 | 0.93733300  |
| H | 0.73419300  | -4.09934900 | -0.08376900 |
| C | 2.57158500  | 2.89348500  | -0.53323500 |
| O | 2.57190700  | 2.19297300  | -1.53466500 |
| N | 3.66276300  | 3.14819000  | 0.20539600  |
| H | 3.55332100  | 3.68208000  | 1.06138500  |
| H | -2.46544200 | 1.28930200  | -0.34585400 |
| H | -2.32146500 | 0.90896600  | 1.38746600  |
| H | 0.04258800  | 6.77429000  | -0.64886500 |
| H | 2.14757700  | -3.47890700 | 0.76221700  |
| S | 2.48893900  | -3.69459000 | -1.60559500 |
| C | 3.72688800  | -2.36203300 | -1.51401800 |
| O | 4.81294700  | -1.15632300 | 0.32337300  |
| C | 4.43276800  | 0.09288600  | -0.27252600 |
| C | 5.18402800  | 1.17602300  | 0.47689900  |
| H | 6.25975400  | 0.94622500  | 0.42608400  |
| H | 4.89280000  | 1.15853800  | 1.53851700  |
| C | 4.96249700  | 2.57520800  | -0.09344000 |
| H | 5.08421800  | 2.56086200  | -1.18655000 |
| H | 3.21166400  | -1.41264400 | -1.69301800 |
| H | 5.71802300  | 3.25692200  | 0.31674700  |
| C | -2.29717600 | -1.90784600 | 1.01705500  |

|   |             |             |             |
|---|-------------|-------------|-------------|
| C | -1.73795000 | -1.65675800 | 2.28437600  |
| C | -2.49098300 | -3.24935400 | 0.63549600  |
| C | -1.39135100 | -2.70593000 | 3.13411200  |
| H | -1.54100300 | -0.63286500 | 2.60582500  |
| C | -2.14120300 | -4.29513500 | 1.48515700  |
| H | -2.89364700 | -3.48138700 | -0.35166000 |
| C | -1.58858600 | -4.02965500 | 2.74040900  |
| H | -0.95624100 | -2.48513700 | 4.11068000  |
| H | -2.29235700 | -5.32646000 | 1.16071400  |
| H | -1.30929700 | -4.85001400 | 3.40378600  |
| H | 3.34503500  | 0.22381400  | -0.18430800 |
| H | 4.71649500  | 0.10917000  | -1.33594600 |
| C | 4.43455200  | -2.34160600 | -0.16050600 |
| O | 4.71869800  | -3.33797600 | 0.44868700  |
| C | -3.54252800 | -0.93637600 | -0.91270000 |
| C | -5.56702200 | -0.61999400 | 0.07785200  |
| H | -5.62490100 | -1.64904400 | 0.43766900  |
| C | -7.02641800 | 1.18610900  | -2.73030600 |
| H | -6.45271500 | 0.75630300  | -3.56336000 |
| H | -8.04787200 | 0.78182700  | -2.75889400 |
| C | -6.26249300 | -0.40310600 | -1.18589200 |
| O | -6.63902900 | -1.28647800 | -1.92839200 |
| O | -6.40351500 | 0.90061200  | -1.48706300 |
| H | -3.91298700 | -1.91032400 | -1.23419700 |
| H | -3.67312200 | -0.10947700 | -1.61602900 |
| C | -5.34942200 | 0.47342000  | 1.06421700  |
| H | -4.63496900 | 0.15994100  | 1.83868100  |
| H | -4.97796100 | 1.38628900  | 0.57806100  |
| H | -6.29554400 | 0.73150400  | 1.57264800  |
| C | 4.77404300  | -2.59221300 | -2.60579500 |
| H | 5.29770700  | -3.54418100 | -2.43930900 |
| H | 4.29457400  | -2.61642700 | -3.59420600 |
| H | 5.51554600  | -1.77976800 | -2.60201100 |
| H | -7.05483100 | 2.27720000  | -2.82046600 |

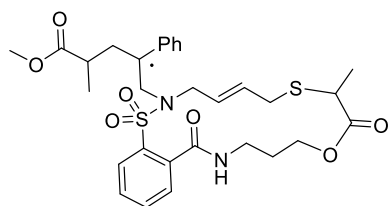

**Int2**

|   |             |            |            |
|---|-------------|------------|------------|
| C | -2.69694200 | 0.09598300 | 0.59163700 |
| C | -1.79162400 | 1.29242500 | 0.71438000 |

|   |             |             |             |
|---|-------------|-------------|-------------|
| N | -0.39051200 | 0.91578400  | 0.46444600  |
| S | 0.81858500  | 1.61413700  | 1.33042300  |
| O | 0.28442400  | 1.90854400  | 2.65500200  |
| O | 1.99994800  | 0.77370100  | 1.19452900  |
| C | 1.19234000  | 3.18622200  | 0.56149300  |
| C | 2.27505300  | 3.35334400  | -0.30956900 |
| C | 2.50315400  | 4.62649100  | -0.84474000 |
| C | 1.66201100  | 5.69290600  | -0.53587900 |
| C | 0.58232800  | 5.50762800  | 0.32772700  |
| C | 0.35125200  | 4.25392000  | 0.88549500  |
| C | -0.05829400 | 0.40207100  | -0.86412100 |
| C | 0.14760800  | -1.08571000 | -0.92565100 |
| C | 0.25755100  | -1.89084600 | 0.13159300  |
| C | 0.47010200  | -3.37884600 | 0.10402300  |
| H | 3.35325700  | 4.77543900  | -1.51375600 |
| H | -0.07346300 | 6.34205900  | 0.57912900  |
| H | -0.47035300 | 4.10254000  | 1.58755400  |
| H | 0.84662600  | 0.90118800  | -1.25267500 |
| H | -0.87132900 | 0.69426500  | -1.54798000 |
| H | 0.24196000  | -1.49889400 | -1.93658300 |
| H | 0.17784600  | -1.45081500 | 1.13085200  |
| H | -0.48834100 | -3.90510300 | 0.24887100  |
| C | 3.20951400  | 2.24906900  | -0.76738100 |
| O | 2.92369600  | 1.53583100  | -1.71794400 |
| N | 4.38925400  | 2.21135100  | -0.12906900 |
| H | 4.51179000  | 2.79083100  | 0.69492300  |
| H | -2.10064800 | 2.06637400  | -0.00772200 |
| H | -1.84695500 | 1.72621400  | 1.72202700  |
| H | 1.85538300  | 6.67603000  | -0.96773200 |
| H | 1.11446100  | -3.68603300 | 0.94104300  |
| S | 1.15959600  | -4.06807400 | -1.42975800 |
| C | 2.72853500  | -3.14569300 | -1.51243100 |
| O | 4.26918300  | -2.23844700 | 0.16583100  |
| C | 4.20871100  | -0.95417700 | -0.47244800 |
| C | 5.29827900  | -0.10691900 | 0.15578800  |
| H | 6.25513600  | -0.64031000 | 0.04399800  |
| H | 5.10478700  | 0.00085400  | 1.23424200  |
| C | 5.43994600  | 1.27381400  | -0.48150400 |
| H | 5.46063100  | 1.18275000  | -1.57751100 |
| H | 2.49115700  | -2.09524500 | -1.71037200 |
| H | 6.39083100  | 1.72159200  | -0.16674200 |
| C | -2.67256100 | -0.93505900 | 1.59437900  |
| C | -1.87068500 | -0.81500700 | 2.76082300  |
| C | -3.42455800 | -2.13000400 | 1.44579600  |



|   |             |             |             |
|---|-------------|-------------|-------------|
| C | -1.82405000 | -1.83002400 | 3.70803300  |
| H | -1.25699000 | 0.07417000  | 2.91238400  |
| C | -3.36898400 | -3.14013100 | 2.39931100  |
| H | -4.05534300 | -2.27240500 | 0.56743000  |
| C | -2.56915500 | -3.00128900 | 3.53709600  |
| H | -1.19388900 | -1.70951000 | 4.59145100  |
| H | -3.95624600 | -4.04870500 | 2.25245000  |
| H | -2.52618400 | -3.79709300 | 4.28243400  |
| H | 3.21497400  | -0.51308900 | -0.31233400 |
| H | 4.39180700  | -1.05739600 | -1.55286600 |
| C | 3.53020500  | -3.28145600 | -0.21908200 |
| O | 3.57330600  | -4.29590600 | 0.42419100  |
| C | -3.60158000 | 0.00041400  | -0.59902500 |
| H | -3.56343900 | -1.01214000 | -1.03404900 |
| H | -3.26028600 | 0.69786700  | -1.37863300 |
| C | -5.07408600 | 0.34570600  | -0.26162900 |
| H | -5.43025600 | -0.34378000 | 0.51663800  |
| C | -6.44244000 | 0.72406300  | -3.66309400 |
| H | -6.20367300 | -0.25525200 | -4.09974800 |
| H | -7.52258700 | 0.77588100  | -3.47050200 |
| C | -5.92768200 | 0.05644000  | -1.47574000 |
| O | -6.69925300 | -0.86317200 | -1.57770600 |
| O | -5.70813400 | 0.93065300  | -2.46158400 |
| C | -5.22629400 | 1.78864300  | 0.21220300  |
| H | -4.66287500 | 1.94336700  | 1.14432500  |
| H | -4.84736800 | 2.48988900  | -0.54505700 |
| H | -6.28046300 | 2.03048600  | 0.41085200  |
| C | 3.56466100  | -3.70846300 | -2.66387300 |
| H | 3.80954300  | -4.76387500 | -2.47877100 |
| H | 3.01077900  | -3.63095100 | -3.60976900 |
| H | 4.50324900  | -3.14434600 | -2.76698400 |
| H | -6.14487400 | 1.52347300  | -4.34930200 |

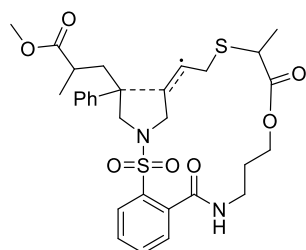

**TS3**

|   |             |            |            |
|---|-------------|------------|------------|
| C | -2.31168500 | 0.26846400 | 0.34642400 |
| C | -1.54999500 | 1.57116100 | 0.58160300 |
| N | -0.15349000 | 1.41871100 | 0.17664500 |

|   |             |             |             |
|---|-------------|-------------|-------------|
| S | 1.13087900  | 1.70870500  | 1.13865000  |
| O | 0.60387700  | 2.14385500  | 2.42780100  |
| O | 2.05711700  | 0.58101600  | 1.08961100  |
| C | 1.98709800  | 3.10338600  | 0.41939200  |
| C | 3.12887400  | 2.94596000  | -0.37345800 |
| C | 3.76742800  | 4.09707500  | -0.84907300 |
| C | 3.26368600  | 5.36335100  | -0.56085400 |
| C | 2.11631100  | 5.50105100  | 0.22093100  |
| C | 1.48043200  | 4.36886200  | 0.72076900  |
| C | -0.03677700 | 0.67398200  | -1.06762700 |
| C | -0.76653600 | -0.64286700 | -0.89123100 |
| C | -0.16396100 | -1.64088000 | -0.15268200 |
| C | -0.64224900 | -3.04948200 | -0.13390100 |
| H | 4.66771200  | 3.99010400  | -1.45773400 |
| H | 1.72216500  | 6.49113200  | 0.45344400  |
| H | 0.59948400  | 4.46104600  | 1.35829700  |
| H | 1.02453700  | 0.53413300  | -1.31857100 |
| H | -0.49821200 | 1.26742600  | -1.87260800 |
| H | -1.47425200 | -0.94392200 | -1.67031600 |
| H | 0.68857700  | -1.37763100 | 0.48494200  |
| H | -1.73111200 | -3.10899900 | -0.27799100 |
| C | 3.69469000  | 1.61014700  | -0.81484500 |
| O | 3.19679100  | 0.99058200  | -1.74290800 |
| N | 4.82094200  | 1.24419300  | -0.18217600 |
| H | 5.11531300  | 1.78317200  | 0.62577300  |
| H | -1.99509300 | 2.36241400  | -0.04035700 |
| H | -1.59054900 | 1.89457700  | 1.62906900  |
| H | 3.77300600  | 6.24796900  | -0.94609000 |
| H | -0.38013200 | -3.55845500 | 0.80408000  |
| S | 0.03544800  | -4.04688800 | -1.53028200 |
| C | 1.78299700  | -3.54776100 | -1.45998200 |
| O | 3.36213600  | -2.93600100 | 0.31071000  |
| C | 3.73026900  | -1.76085400 | -0.42551400 |
| C | 4.99861400  | -1.22294900 | 0.20713000  |
| H | 5.76576900  | -2.01170600 | 0.16487300  |
| H | 4.81477200  | -0.99716700 | 1.26873800  |
| C | 5.53926700  | 0.02224500  | -0.49510000 |
| H | 5.51558200  | -0.11723900 | -1.58591100 |
| H | 1.83689000  | -2.49064300 | -1.74494900 |
| H | 6.58504000  | 0.17873200  | -0.20273200 |
| C | -2.44662200 | -0.66607200 | 1.47645600  |
| C | -1.55482700 | -0.61709600 | 2.56791700  |
| C | -3.39990600 | -1.70492300 | 1.46497100  |
| C | -1.62133400 | -1.55287000 | 3.59757300  |

|   |             |             |             |
|---|-------------|-------------|-------------|
| H | -0.78858000 | 0.15858700  | 2.61698300  |
| C | -3.46657700 | -2.63766600 | 2.49827300  |
| H | -4.10184600 | -1.79637100 | 0.63489200  |
| C | -2.57785100 | -2.56964200 | 3.57185300  |
| H | -0.91537100 | -1.48721800 | 4.42788000  |
| H | -4.21958600 | -3.42731400 | 2.46006500  |
| H | -2.62918900 | -3.30123900 | 4.38000500  |
| H | 2.91338700  | -1.02789700 | -0.37266500 |
| H | 3.92228100  | -2.01188600 | -1.47940900 |
| C | 2.37940000  | -3.75799800 | -0.07011000 |
| O | 2.05312700  | -4.65476500 | 0.66015500  |
| C | -3.44930100 | 0.35297000  | -0.64553900 |
| H | -3.65441300 | -0.64177500 | -1.07050400 |
| H | -3.14166900 | 0.99757800  | -1.48505500 |
| C | -4.77553800 | 0.90487500  | -0.06267600 |
| H | -5.11052100 | 0.22961900  | 0.73642800  |
| C | -6.67912800 | 1.71157300  | -3.11814300 |
| H | -6.50820100 | 0.80375200  | -3.71272600 |
| H | -7.71531800 | 1.71033300  | -2.75386100 |
| C | -5.82163700 | 0.77709100  | -1.14804600 |
| O | -6.59661700 | -0.14014400 | -1.25074600 |
| O | -5.76444000 | 1.77827300  | -2.02978300 |
| C | -4.67097500 | 2.32532200  | 0.48242200  |
| H | -4.01057400 | 2.35221800  | 1.36087600  |
| H | -4.27634900 | 3.01544000  | -0.27651400 |
| H | -5.65837100 | 2.69218500  | 0.79858600  |
| C | 2.56966000  | -4.39251800 | -2.46514700 |
| H | 2.52098700  | -5.45569700 | -2.19037500 |
| H | 2.15373500  | -4.26615800 | -3.47433500 |
| H | 3.62552300  | -4.08555800 | -2.48656200 |
| H | -6.49772300 | 2.60090800  | -3.73028000 |

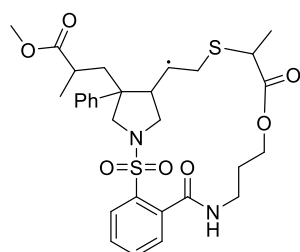

**Int3**

|   |             |             |            |
|---|-------------|-------------|------------|
| C | 0.48385500  | -1.38879200 | 0.46581300 |
| C | -1.04413300 | -1.21552200 | 0.35903600 |
| N | -1.29630100 | 0.10388400  | 0.94946800 |

|   |             |             |             |
|---|-------------|-------------|-------------|
| S | -2.75184000 | 0.44868100  | 1.59278500  |
| O | -3.18194800 | -0.58331900 | 2.53351100  |
| O | -2.70126300 | 1.82720300  | 2.07220400  |
| C | -3.81005700 | 0.29717100  | 0.15709700  |
| C | -3.49159600 | 0.91643600  | -1.06155900 |
| C | -4.30101800 | 0.63784400  | -2.16660500 |
| C | -5.41329200 | -0.19508600 | -2.05331100 |
| C | -5.72614200 | -0.78336100 | -0.83028000 |
| C | -4.91117500 | -0.54944000 | 0.27534100  |
| C | -0.07388100 | 0.84877700  | 1.24227600  |
| C | 0.93811700  | 0.12426600  | 0.35124300  |
| C | 2.35216700  | 0.44836400  | 0.67602200  |
| C | 3.42825300  | 0.47361900  | -0.34896000 |
| H | -4.04991600 | 1.09144100  | -3.12672000 |
| H | -6.59096800 | -1.44130400 | -0.73666500 |
| H | -5.10904700 | -1.03634800 | 1.23025800  |
| H | 0.21656600  | 0.77075300  | 2.30433500  |
| H | -0.19381200 | 1.90770700  | 0.98711100  |
| H | 0.73330700  | 0.40530200  | -0.69817400 |
| H | 2.60983200  | 0.69179400  | 1.70810800  |
| H | 3.54427900  | -0.49365900 | -0.86504600 |
| C | -2.34976000 | 1.88311900  | -1.33170100 |
| O | -1.58876400 | 1.69370100  | -2.26654800 |
| N | -2.35826000 | 3.00104300  | -0.57780800 |
| H | -2.98055200 | 3.03574800  | 0.22418100  |
| H | -1.35262300 | -1.21809500 | -0.69953300 |
| H | -1.61026600 | -1.99362600 | 0.88723000  |
| H | -6.03313100 | -0.38899800 | -2.93002700 |
| H | 4.40252500  | 0.71773100  | 0.09530800  |
| S | 3.11579600  | 1.63139100  | -1.75372800 |
| C | 3.65226500  | 3.22994600  | -1.02854700 |
| O | 1.75319600  | 3.61424500  | 0.50588200  |
| C | 0.80576100  | 3.67312200  | -0.56186400 |
| C | -0.39312900 | 4.45454800  | -0.05690600 |
| H | -0.15096300 | 5.52729100  | -0.04380100 |
| H | -0.61299200 | 4.16055600  | 0.98134500  |
| C | -1.63168000 | 4.21351900  | -0.91557200 |
| H | -1.35858300 | 4.15090400  | -1.97870500 |
| H | 3.21442000  | 3.98028600  | -1.70238600 |
| H | -2.32862200 | 5.05418300  | -0.79858500 |
| C | 0.91953800  | -1.94843600 | 1.81765800  |
| C | 0.06464800  | -1.98247700 | 2.92788300  |
| C | 2.24130800  | -2.39153000 | 1.99251800  |
| C | 0.51185900  | -2.45288700 | 4.16557600  |

|   |             |             |             |
|---|-------------|-------------|-------------|
| H | -0.96371200 | -1.62430100 | 2.84926400  |
| C | 2.68803300  | -2.86341300 | 3.22515200  |
| H | 2.93663200  | -2.37165800 | 1.15047400  |
| C | 1.82255800  | -2.89790300 | 4.31996200  |
| H | -0.17559400 | -2.46715000 | 5.01346000  |
| H | 3.71907600  | -3.20638300 | 3.32991800  |
| H | 2.17006800  | -3.26775600 | 5.28622800  |
| H | 0.52138900  | 2.65191800  | -0.85835500 |
| H | 1.23236900  | 4.16797100  | -1.44650100 |
| C | 3.06541400  | 3.40357900  | 0.36466300  |
| O | 3.75246700  | 3.35401900  | 1.35058700  |
| C | 1.05285300  | -2.18737900 | -0.71867500 |
| H | 2.13337600  | -1.99700300 | -0.79244000 |
| H | 0.60218100  | -1.78415900 | -1.64027000 |
| C | 0.85501500  | -3.71441200 | -0.69062900 |
| H | 1.44079200  | -4.13056700 | 0.14048400  |
| C | 1.28837400  | -4.58932300 | -4.24905400 |
| H | 2.19258200  | -4.01651900 | -4.49615100 |
| H | 1.54472800  | -5.65603500 | -4.19563700 |
| C | 1.51464600  | -4.25946600 | -1.93990300 |
| O | 2.63045500  | -4.71167300 | -1.98851800 |
| O | 0.73325200  | -4.14403900 | -3.01668900 |
| C | 5.16373200  | 3.37716100  | -1.00675000 |
| H | 5.44393100  | 4.36079900  | -0.60284200 |
| H | 5.62774700  | 2.60859700  | -0.37414000 |
| H | 5.55952300  | 3.28685500  | -2.02644400 |
| C | -0.59821300 | -4.16397800 | -0.56711300 |
| H | -0.97576400 | -3.95904000 | 0.44376700  |
| H | -1.24016200 | -3.64958200 | -1.29609300 |
| H | -0.68551700 | -5.24687500 | -0.73772600 |
| H | 0.52043300  | -4.42590100 | -5.01204900 |

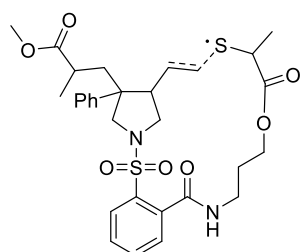

**TS4**

|   |             |             |            |
|---|-------------|-------------|------------|
| C | 1.88227100  | -0.27534000 | 0.14884900 |
| C | 1.23915700  | -1.67196900 | 0.06352900 |
| N | -0.17299300 | -1.39895100 | 0.34664200 |

|   |             |             |             |
|---|-------------|-------------|-------------|
| S | -1.15512200 | -2.44016900 | 1.11791600  |
| O | -0.32349800 | -3.53534400 | 1.60028900  |
| O | -1.95807000 | -1.69914100 | 2.08653700  |
| C | -2.24397000 | -3.11094200 | -0.15258900 |
| C | -3.27129100 | -2.39854100 | -0.80681100 |
| C | -3.91537900 | -3.03217200 | -1.87723800 |
| C | -3.59670100 | -4.32995000 | -2.26631000 |
| C | -2.59571000 | -5.02579300 | -1.59569200 |
| C | -1.91303200 | -4.40930700 | -0.55103500 |
| C | -0.55269700 | -0.01477600 | 0.07097400  |
| C | 0.73813600  | 0.56565300  | -0.52466500 |
| C | 0.81170400  | 2.04785000  | -0.39168100 |
| C | 1.03778600  | 2.87907000  | -1.45271800 |
| H | -4.69218500 | -2.47816600 | -2.40523900 |
| H | -2.33289700 | -6.04363400 | -1.88653100 |
| H | -1.10931800 | -4.93387500 | -0.03581200 |
| H | -0.84426500 | 0.50762200  | 0.99792700  |
| H | -1.37690300 | 0.05388700  | -0.65678100 |
| H | 0.77428500  | 0.30732300  | -1.59543700 |
| H | 0.57752400  | 2.47967900  | 0.58554700  |
| H | 1.40819300  | 2.47782600  | -2.39964300 |
| C | -3.81319200 | -0.99888400 | -0.53844800 |
| O | -4.03606400 | -0.25320000 | -1.48105500 |
| N | -4.13613000 | -0.71182300 | 0.73271400  |
| H | -3.80456000 | -1.33326200 | 1.46393700  |
| H | 1.36513000  | -2.07571400 | -0.95415100 |
| H | 1.63803100  | -2.39719100 | 0.77843600  |
| H | -4.13225600 | -4.79360000 | -3.09595400 |
| H | 1.13410100  | 3.95636700  | -1.29654800 |
| S | -1.22020500 | 2.89054700  | -2.37236500 |
| C | -1.88220100 | 4.27480000  | -1.37356300 |
| O | -2.06672500 | 3.13736400  | 0.80951000  |
| C | -3.15933300 | 2.33803800  | 0.34596600  |
| C | -3.72270000 | 1.60416800  | 1.54761600  |
| H | -4.19368700 | 2.33342300  | 2.22362700  |
| H | -2.90540900 | 1.11945800  | 2.10433400  |
| C | -4.74392500 | 0.54006900  | 1.14379900  |
| H | -5.37487900 | 0.89988500  | 0.31848000  |
| H | -2.97457300 | 4.16862600  | -1.45743000 |
| H | -5.40024400 | 0.31800800  | 1.99489100  |
| C | 2.11344300  | 0.17615900  | 1.59187300  |
| C | 1.65329100  | -0.54671100 | 2.70117800  |
| C | 2.81197400  | 1.37096600  | 1.83439300  |
| C | 1.87493800  | -0.08780500 | 4.00231700  |

|   |             |             |             |
|---|-------------|-------------|-------------|
| H | 1.10839700  | -1.48251000 | 2.57315500  |
| C | 3.03451500  | 1.83047000  | 3.13069300  |
| H | 3.19549400  | 1.95431500  | 0.99433700  |
| C | 2.56414000  | 1.10158900  | 4.22422700  |
| H | 1.50310800  | -0.67243500 | 4.84579800  |
| H | 3.58190000  | 2.76197400  | 3.28624400  |
| H | 2.73699800  | 1.45835100  | 5.24107000  |
| H | -2.81284000 | 1.64809500  | -0.43507900 |
| H | -3.94053100 | 2.97907700  | -0.09108200 |
| C | -1.47747600 | 4.08968000  | 0.08176300  |
| O | -0.61649700 | 4.75921900  | 0.59224200  |
| C | 3.15061300  | -0.15602600 | -0.71470900 |
| H | 3.31376500  | 0.90801500  | -0.95323000 |
| H | 2.94912500  | -0.66128600 | -1.67301900 |
| C | 4.45206000  | -0.71981500 | -0.11963900 |
| H | 4.74842000  | -0.10567500 | 0.74145500  |
| C | 6.43286900  | -1.23581700 | -3.18821800 |
| H | 6.35599400  | -0.24850000 | -3.66379700 |
| H | 7.44708900  | -1.36024300 | -2.78527100 |
| C | 5.54699900  | -0.50668200 | -1.14376100 |
| O | 6.39014900  | 0.35195200  | -1.08852600 |
| O | 5.46227400  | -1.37341900 | -2.15680900 |
| C | -1.45087900 | 5.63440200  | -1.89442200 |
| H | -1.90202000 | 6.43785500  | -1.29332400 |
| H | -0.35896900 | 5.74107300  | -1.84725000 |
| H | -1.77264500 | 5.75064000  | -2.93757300 |
| C | 4.36126000  | -2.18460700 | 0.30375700  |
| H | 3.73993300  | -2.28328200 | 1.20464900  |
| H | 3.92856000  | -2.80414300 | -0.49491100 |
| H | 5.35770000  | -2.58254800 | 0.54554000  |
| H | 6.22094300  | -2.02219800 | -3.91980100 |

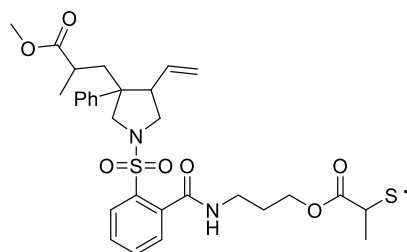

**Int4**

|   |             |             |             |
|---|-------------|-------------|-------------|
| C | -1.07079000 | -1.49008400 | 0.05786200  |
| C | 0.05377300  | -2.28906200 | -0.63988200 |
| N | 1.30841900  | -1.61525900 | -0.23384000 |
| S | 2.54957500  | -1.54446600 | -1.30245800 |

|   |             |             |             |
|---|-------------|-------------|-------------|
| O | 2.51683500  | -2.79804400 | -2.04308400 |
| O | 2.54059200  | -0.31309300 | -2.10243600 |
| C | 4.00904700  | -1.51714100 | -0.25488800 |
| C | 4.44379400  | -0.43484700 | 0.53873400  |
| C | 5.58704500  | -0.63768000 | 1.32329200  |
| C | 6.29833100  | -1.83321500 | 1.30022600  |
| C | 5.85950700  | -2.88424700 | 0.50107500  |
| C | 4.70867900  | -2.72703500 | -0.26486400 |
| C | 1.06648500  | -0.54156800 | 0.72913600  |
| C | -0.29781200 | -0.91674500 | 1.30142800  |
| C | -0.96574500 | 0.22227900  | 2.00618200  |
| C | -1.56320400 | 0.12631600  | 3.19457600  |
| H | 5.91420700  | 0.18031200  | 1.96521000  |
| H | 6.40115900  | -3.83048000 | 0.47516200  |
| H | 4.34050400  | -3.54789100 | -0.87935600 |
| H | 1.02609600  | 0.44472300  | 0.23743100  |
| H | 1.83845000  | -0.52118900 | 1.51214200  |
| H | -0.16751500 | -1.75791100 | 2.00110300  |
| H | -0.96671700 | 1.18581200  | 1.48320700  |
| H | -1.58420300 | -0.81799400 | 3.74796100  |
| C | 3.83349200  | 0.94918300  | 0.74068900  |
| O | 3.81021500  | 1.42159200  | 1.86737500  |
| N | 3.43604100  | 1.63228800  | -0.34541500 |
| H | 3.38530800  | 1.15741600  | -1.24278000 |
| H | 0.06603900  | -3.32700800 | -0.27861400 |
| H | -0.05044500 | -2.31000500 | -1.73125300 |
| H | 7.19341800  | -1.94180500 | 1.91434100  |
| H | -2.04756800 | 0.99189400  | 3.65477400  |
| S | -3.01874300 | 3.17365900  | 1.39206500  |
| C | -2.63287700 | 4.70021100  | 0.49268600  |
| O | -0.29524100 | 4.62324600  | 0.82646900  |
| C | 1.06436600  | 4.52360400  | 0.39453600  |
| C | 1.47707400  | 3.07591000  | 0.20317500  |
| H | 0.82998400  | 2.60382600  | -0.55517200 |
| H | 1.34686000  | 2.53400900  | 1.15275500  |
| C | 2.93916900  | 2.98966100  | -0.23114700 |
| H | 3.56648900  | 3.51988800  | 0.50059800  |
| H | -2.58030000 | 5.44674800  | 1.30621900  |
| H | 3.07405300  | 3.47624100  | -1.20680700 |
| C | -1.59076300 | -0.33143500 | -0.79438300 |
| C | -0.81344700 | 0.24516600  | -1.80975500 |
| C | -2.83914800 | 0.24961200  | -0.52122100 |
| C | -1.26637200 | 1.35337100  | -2.52824000 |
| H | 0.17453600  | -0.14885200 | -2.04822500 |



|   |             |             |             |
|---|-------------|-------------|-------------|
| C | -3.30149100 | 1.34855700  | -1.24870200 |
| H | -3.46869000 | -0.15401200 | 0.27413700  |
| C | -2.51430600 | 1.90833400  | -2.25566500 |
| H | -0.63228700 | 1.78391600  | -3.30556200 |
| H | -4.28481000 | 1.76740600  | -1.02307400 |
| H | -2.86801600 | 2.77155200  | -2.82103200 |
| H | 1.65670000  | 4.99482700  | 1.18951500  |
| H | 1.19471200  | 5.09817000  | -0.53323500 |
| C | -1.23988800 | 4.62834900  | -0.11270500 |
| O | -1.01853000 | 4.60185100  | -1.29470700 |
| C | -2.19315800 | -2.40902500 | 0.57012900  |
| H | -2.76611600 | -1.86218400 | 1.33699600  |
| H | -1.71547400 | -3.25574900 | 1.08854300  |
| C | -3.18087400 | -2.96596600 | -0.47068400 |
| H | -3.74661300 | -2.13563300 | -0.91310900 |
| C | -4.64274900 | -5.79647100 | 1.39067200  |
| H | -4.91071400 | -5.31045800 | 2.33873600  |
| H | -5.55975900 | -5.99693700 | 0.82020500  |
| C | -4.21325800 | -3.77381900 | 0.28711300  |
| O | -5.31553700 | -3.38482300 | 0.57947100  |
| O | -3.75360300 | -4.97715900 | 0.64022800  |
| C | -3.68700700 | 5.09476800  | -0.52704100 |
| H | -3.42871100 | 6.06116900  | -0.98314800 |
| H | -3.75332000 | 4.34487900  | -1.32654700 |
| H | -4.66586100 | 5.18296000  | -0.03898300 |
| C | -2.52629700 | -3.78384500 | -1.58112200 |
| H | -1.94856600 | -3.13007800 | -2.24837500 |
| H | -1.85542700 | -4.55087000 | -1.16949800 |
| H | -3.28865900 | -4.28737300 | -2.19341200 |
| H | -4.11059700 | -6.73301200 | 1.58644100  |

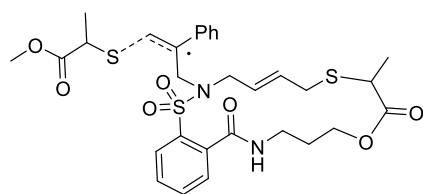

**TS5**

|   |             |             |             |
|---|-------------|-------------|-------------|
| C | 2.08451000  | -1.65183200 | 0.14397400  |
| C | 1.84907400  | -0.20536300 | -0.21896700 |
| N | 0.42102900  | 0.11620100  | -0.20679900 |
| S | -0.15852100 | 1.17714200  | -1.32545500 |
| O | 0.57351600  | 0.93918900  | -2.56309600 |
| O | -1.61038700 | 1.07912100  | -1.30868200 |

|   |             |             |             |
|---|-------------|-------------|-------------|
| C | 0.28329400  | 2.81874100  | -0.76848200 |
| C | -0.62622000 | 3.65445200  | -0.11047400 |
| C | -0.19482300 | 4.92955200  | 0.27331700  |
| C | 1.11150500  | 5.34593300  | 0.02800800  |
| C | 2.00854900  | 4.49722600  | -0.62075700 |
| C | 1.59214700  | 3.23394200  | -1.02937000 |
| C | -0.26946800 | 0.05768200  | 1.08313800  |
| C | -1.24431300 | -1.07824000 | 1.21915400  |
| C | -1.65646300 | -1.86741000 | 0.22639000  |
| C | -2.62608000 | -3.01083300 | 0.34000700  |
| H | -0.89842900 | 5.59872000  | 0.77293600  |
| H | 3.03013100  | 4.82217600  | -0.82151600 |
| H | 2.27534900  | 2.57289800  | -1.56568600 |
| H | -0.79773000 | 1.00708200  | 1.28183000  |
| H | 0.50179400  | -0.02205200 | 1.86567300  |
| H | -1.64804300 | -1.22017000 | 2.22835100  |
| H | -1.25274500 | -1.69886700 | -0.77710100 |
| H | -2.08143100 | -3.96752700 | 0.41045000  |
| C | -2.04601200 | 3.27566000  | 0.26763500  |
| O | -2.28313400 | 2.68391100  | 1.31023100  |
| N | -2.99027300 | 3.74099400  | -0.56463500 |
| H | -2.69726300 | 4.16012800  | -1.44120400 |
| H | 2.40311000  | 0.43973600  | 0.48370300  |
| H | 2.23315000  | -0.01586700 | -1.23237000 |
| H | 1.42844500  | 6.34213100  | 0.34026100  |
| H | -3.24295700 | -3.07852600 | -0.56841800 |
| S | -3.73194100 | -2.99384700 | 1.78259800  |
| C | -4.57472500 | -1.40095100 | 1.51764500  |
| O | -5.22080800 | -0.11704500 | -0.46873600 |
| C | -4.56033900 | 1.03994100  | 0.06543600  |
| C | -4.95913100 | 2.21062300  | -0.81194300 |
| H | -6.05856000 | 2.27113100  | -0.82621300 |
| H | -4.62526700 | 2.02660400  | -1.84481700 |
| C | -4.40920100 | 3.54979800  | -0.32544500 |
| H | -4.59043600 | 3.66249200  | 0.75368000  |
| H | -3.84030000 | -0.60247600 | 1.66588800  |
| H | -4.93555400 | 4.36470300  | -0.83788900 |
| C | 1.45776900  | -2.70020100 | -0.68761700 |
| C | 1.04481500  | -2.42655200 | -2.00298900 |
| C | 1.22066800  | -3.98427900 | -0.16648100 |
| C | 0.42396800  | -3.40911200 | -2.77210400 |
| H | 1.18035000  | -1.43024700 | -2.42702200 |
| C | 0.59668200  | -4.96299800 | -0.93532100 |
| H | 1.49804600  | -4.21152800 | 0.86430100  |

|   |             |             |             |
|---|-------------|-------------|-------------|
| C | 0.19474800  | -4.67947800 | -2.24243900 |
| H | 0.10953500  | -3.17662500 | -3.79116100 |
| H | 0.41208100  | -5.95004400 | -0.50733400 |
| H | -0.30062200 | -5.44443700 | -2.84298700 |
| H | -3.47338900 | 0.87966700  | 0.05019300  |
| H | -4.88729600 | 1.22032700  | 1.10092300  |
| C | -5.18791900 | -1.31405300 | 0.12120300  |
| O | -5.69189300 | -2.25269100 | -0.43525200 |
| C | 2.90328100  | -1.93607800 | 1.19389300  |
| H | 3.09133700  | -2.96184400 | 1.51539400  |
| H | 3.25242700  | -1.13354200 | 1.84736900  |
| S | 5.12187700  | -1.96729600 | -0.11505200 |
| C | 5.35012300  | -0.16262500 | -0.29901900 |
| C | 5.47485700  | 0.45006100  | 1.07755400  |
| O | 4.54851100  | 0.92175000  | 1.69395400  |
| O | 6.71026500  | 0.38796700  | 1.56129500  |
| C | 6.89747500  | 0.88104100  | 2.88464200  |
| H | 6.30147000  | 0.29800100  | 3.59994200  |
| H | 6.60572300  | 1.93764300  | 2.94906300  |
| C | -5.69596800 | -1.26544300 | 2.55017900  |
| H | -6.44064600 | -2.06229000 | 2.41345000  |
| H | -5.28638200 | -1.33027200 | 3.56778500  |
| H | -6.19963800 | -0.29355700 | 2.44278300  |
| H | 4.44791600  | 0.26255200  | -0.75860600 |
| C | 6.56028100  | 0.09231100  | -1.19324500 |
| H | 7.46306700  | -0.36782300 | -0.77059700 |
| H | 6.38101900  | -0.32613100 | -2.19235200 |
| H | 6.73306400  | 1.17448700  | -1.29098100 |
| H | 7.96367900  | 0.77032800  | 3.10600600  |

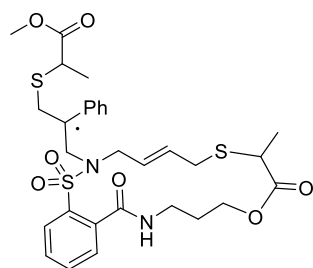

**Int5**

|   |             |             |            |
|---|-------------|-------------|------------|
| C | -2.17548900 | -0.24481100 | 0.70899700 |
| C | -1.37459800 | 1.02327700  | 0.83581100 |
| N | 0.04245900  | 0.78967400  | 0.51875400 |
| S | 1.21918600  | 1.54683600  | 1.38101600 |
| O | 0.70857400  | 1.73064500  | 2.73439800 |

|   |             |             |             |
|---|-------------|-------------|-------------|
| O | 2.46009900  | 0.81581300  | 1.16692900  |
| C | 1.43520000  | 3.18000500  | 0.68354000  |
| C | 2.47080900  | 3.47955900  | -0.20928300 |
| C | 2.57994500  | 4.79386600  | -0.67795100 |
| C | 1.66889500  | 5.77129900  | -0.28402600 |
| C | 0.63723300  | 5.45382700  | 0.59943500  |
| C | 0.52453400  | 4.15755400  | 1.09272500  |
| C | 0.37432000  | 0.35268900  | -0.83609000 |
| C | 0.68135900  | -1.11350600 | -0.95734400 |
| C | 0.88518900  | -1.94014800 | 0.06901500  |
| C | 1.21518000  | -3.40429400 | -0.01451200 |
| H | 3.39222300  | 5.04622700  | -1.36269100 |
| H | -0.07282800 | 6.21817600  | 0.91735500  |
| H | -0.25776700 | 3.90392800  | 1.81020500  |
| H | 1.23405900  | 0.92726100  | -1.22226400 |
| H | -0.46994200 | 0.61663200  | -1.49272700 |
| H | 0.77560400  | -1.48601400 | -1.98392100 |
| H | 0.80338200  | -1.53939300 | 1.08468300  |
| H | 0.30734100  | -4.01195400 | 0.13671100  |
| C | 3.46955100  | 2.47746100  | -0.75761100 |
| O | 3.19817300  | 1.78429100  | -1.72715400 |
| N | 4.67643400  | 2.50855700  | -0.17225400 |
| H | 4.78979700  | 3.05890500  | 0.67288400  |
| H | -1.78769800 | 1.78629400  | 0.15420300  |
| H | -1.42789800 | 1.41561000  | 1.85969400  |
| H | 1.76999400  | 6.78876700  | -0.66465300 |
| H | 1.90657800  | -3.68369600 | 0.79407800  |
| S | 1.91439000  | -3.98471700 | -1.58845700 |
| C | 3.39609300  | -2.92982600 | -1.68750000 |
| O | 4.92571900  | -1.94396600 | -0.04498700 |
| C | 4.73837100  | -0.65159400 | -0.64103900 |
| C | 5.77831800  | 0.26290000  | -0.02267900 |
| H | 6.77068900  | -0.18411100 | -0.18974400 |
| H | 5.61959900  | 0.31587600  | 1.06549800  |
| C | 5.77980200  | 1.67288800  | -0.60999500 |
| H | 5.75483300  | 1.62486200  | -1.70860500 |
| H | 3.06538000  | -1.89814000 | -1.84609700 |
| H | 6.70636000  | 2.18415700  | -0.32033600 |
| C | -2.11929900 | -1.26063100 | 1.72409700  |
| C | -1.24221300 | -1.14373000 | 2.83455100  |
| C | -2.92628000 | -2.42562600 | 1.64872400  |
| C | -1.16965600 | -2.14272000 | 3.79686100  |
| H | -0.59686300 | -0.26910300 | 2.92984400  |
| C | -2.84797800 | -3.41659700 | 2.61972500  |

|   |             |             |             |
|---|-------------|-------------|-------------|
| H | -3.63589300 | -2.54359900 | 0.82867600  |
| C | -1.96742900 | -3.28722900 | 3.69779600  |
| H | -0.48013800 | -2.02995900 | 4.63567100  |
| H | -3.48335000 | -4.30040400 | 2.53709400  |
| H | -1.90588500 | -4.06950500 | 4.45604000  |
| H | 3.71872800  | -0.29784400 | -0.43373200 |
| H | 4.89020600  | -0.70887200 | -1.72989300 |
| C | 4.24936600  | -3.03073200 | -0.42465800 |
| O | 4.38889400  | -4.05068800 | 0.19568500  |
| C | -3.06184200 | -0.39065100 | -0.47818200 |
| H | -3.11115000 | -1.42546900 | -0.84495400 |
| H | -2.71940700 | 0.25710100  | -1.29703600 |
| S | -4.76775700 | 0.15746800  | -0.03472900 |
| C | -5.46723600 | 0.23759800  | -1.73389100 |
| C | -6.94521300 | -0.06944500 | -1.61558000 |
| O | -7.48072800 | -1.05253400 | -2.05501300 |
| O | -7.59346000 | 0.88756900  | -0.95240000 |
| C | -8.99228900 | 0.69045800  | -0.76770300 |
| H | -9.18005500 | -0.22816600 | -0.19558000 |
| H | -9.50337900 | 0.62147200  | -1.73733200 |
| C | 4.23935700  | -3.38788700 | -2.87964700 |
| H | 4.57784800  | -4.42339000 | -2.73361100 |
| H | 3.65087600  | -3.33194500 | -3.80593200 |
| H | 5.12336800  | -2.74350600 | -2.99352500 |
| H | -5.02751800 | -0.59248900 | -2.30167100 |
| C | -5.19985200 | 1.57615000  | -2.40714100 |
| H | -5.64801900 | 2.39297000  | -1.82650200 |
| H | -4.11780900 | 1.75203200  | -2.48609800 |
| H | -5.62413600 | 1.58599300  | -3.42286300 |
| H | -9.35556700 | 1.56062500  | -0.21198700 |

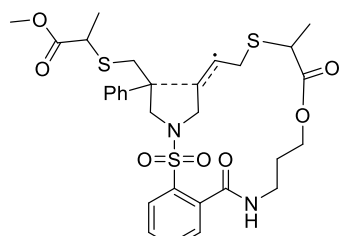

**TS6**

|   |             |             |            |
|---|-------------|-------------|------------|
| C | -1.85777700 | -0.37560800 | 0.35394500 |
| C | -1.38527100 | 1.03827900  | 0.67856200 |
| N | -0.00553500 | 1.23299700  | 0.23193100 |
| S | 1.20839400  | 1.71638600  | 1.21564000 |
| O | 0.62074800  | 1.95141700  | 2.52968100 |

|   |             |             |             |
|---|-------------|-------------|-------------|
| O | 2.34775300  | 0.81017500  | 1.09762200  |
| C | 1.75032000  | 3.29739100  | 0.58310500  |
| C | 2.88914500  | 3.42473800  | -0.21957400 |
| C | 3.27792800  | 4.70973500  | -0.61528700 |
| C | 2.53495100  | 5.82719800  | -0.24128500 |
| C | 1.39436100  | 5.67970900  | 0.54835700  |
| C | 1.00515800  | 4.41225400  | 0.97059200  |
| C | 0.25962400  | 0.55998600  | -1.03168300 |
| C | -0.12680300 | -0.89832900 | -0.88493700 |
| C | 0.66728300  | -1.73960200 | -0.13868500 |
| C | 0.49970600  | -3.21905000 | -0.12629700 |
| H | 4.17302500  | 4.82652900  | -1.22975800 |
| H | 0.81367700  | 6.55297300  | 0.84810800  |
| H | 0.13339900  | 4.28338300  | 1.61428200  |
| H | 1.31726600  | 0.68700400  | -1.30402700 |
| H | -0.34731400 | 1.04246000  | -1.81367200 |
| H | -0.74332400 | -1.34562100 | -1.67192900 |
| H | 1.43348000  | -1.30274800 | 0.51131900  |
| H | -0.56055100 | -3.50608500 | -0.20322700 |
| C | 3.70403200  | 2.26179900  | -0.75074000 |
| O | 3.31531400  | 1.60078600  | -1.70220200 |
| N | 4.90268200  | 2.10740300  | -0.16601400 |
| H | 5.10831700  | 2.65459300  | 0.66371500  |
| H | -2.03014200 | 1.75391600  | 0.14243100  |
| H | -1.45280100 | 1.25828600  | 1.75034400  |
| H | 2.85190500  | 6.81969400  | -0.56513900 |
| H | 0.92189800  | -3.66917200 | 0.78239800  |
| S | 1.28665300  | -4.03025300 | -1.58181400 |
| C | 2.89648900  | -3.18208300 | -1.57202000 |
| O | 4.39022200  | -2.30130500 | 0.16098300  |
| C | 4.46931400  | -1.05017200 | -0.53675500 |
| C | 5.61928800  | -0.27819100 | 0.08027300  |
| H | 6.53505700  | -0.88002200 | -0.02706700 |
| H | 5.43633600  | -0.14497900 | 1.15765900  |
| C | 5.85049700  | 1.08497600  | -0.57044000 |
| H | 5.80805700  | 0.99543200  | -1.66579000 |
| H | 2.71621500  | -2.12899300 | -1.81792200 |
| H | 6.85088400  | 1.44873900  | -0.30479900 |
| C | -1.86798000 | -1.37243300 | 1.43317400  |
| C | -0.93394300 | -1.28403400 | 2.48637400  |
| C | -2.73590200 | -2.48195300 | 1.41788700  |
| C | -0.86682000 | -2.26392100 | 3.47227800  |
| H | -0.24297600 | -0.43943200 | 2.53181600  |
| C | -2.66934500 | -3.45910300 | 2.41027000  |

|   |             |             |             |
|---|-------------|-------------|-------------|
| H | -3.48367400 | -2.58235700 | 0.62974700  |
| C | -1.73253000 | -3.36017500 | 3.43943000  |
| H | -0.13051500 | -2.17204400 | 4.27308900  |
| H | -3.35782200 | -4.30569700 | 2.37698900  |
| H | -1.67885200 | -4.12843800 | 4.21265200  |
| H | 3.51838900  | -0.51042400 | -0.42606200 |
| H | 4.66739600  | -1.21813500 | -1.60615300 |
| C | 3.59254100  | -3.30425600 | -0.21808900 |
| O | 3.50479200  | -4.27593300 | 0.48339200  |
| C | -2.93061100 | -0.44683500 | -0.69201900 |
| H | -3.05276000 | -1.46052500 | -1.09681800 |
| H | -2.68621000 | 0.23265800  | -1.52175900 |
| S | -4.53757100 | 0.11621800  | 0.01068800  |
| C | -5.36793500 | 0.57863500  | -1.56375600 |
| H | -5.05375000 | -0.15128800 | -2.32060400 |
| C | -6.85258600 | 0.36078800  | -1.36104300 |
| O | -7.50895000 | -0.47176500 | -1.92901300 |
| O | -7.35503700 | 1.20739100  | -0.46299800 |
| C | -8.74517200 | 1.07510400  | -0.18048400 |
| H | -8.96441400 | 0.07450600  | 0.21598700  |
| H | -9.34075400 | 1.24114200  | -1.08811500 |
| C | -5.03880800 | 2.00166000  | -1.99125000 |
| H | -5.36145200 | 2.71594900  | -1.22246400 |
| H | -3.95534400 | 2.11146700  | -2.14208200 |
| H | -5.54372400 | 2.24489400  | -2.93878200 |
| C | 3.78876700  | -3.81453100 | -2.64234800 |
| H | 3.97568300  | -4.87203300 | -2.40800200 |
| H | 3.30532400  | -3.74780600 | -3.62684000 |
| H | 4.75562900  | -3.29313800 | -2.69722700 |
| H | -8.98147700 | 1.83689700  | 0.56901100  |

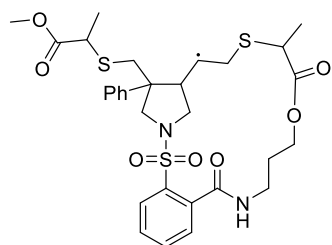

**Int6**

|   |             |             |             |
|---|-------------|-------------|-------------|
| C | -1.48757100 | -0.17606600 | -0.00345800 |
| C | -1.28865900 | 1.34252800  | 0.16263400  |
| N | 0.17824000  | 1.51255100  | 0.15430400  |
| S | 0.86260200  | 2.74177700  | 0.98735900  |
| O | -0.16457700 | 3.76565800  | 1.11405100  |

|   |             |             |             |
|---|-------------|-------------|-------------|
| O | 1.48607500  | 2.27535200  | 2.23100300  |
| C | 2.15428100  | 3.35726600  | -0.10942400 |
| C | 3.38994900  | 2.73824400  | -0.40369900 |
| C | 4.21043400  | 3.37246800  | -1.34705800 |
| C | 3.85997300  | 4.57508800  | -1.95143700 |
| C | 2.64455700  | 5.17458600  | -1.63959600 |
| C | 1.79238000  | 4.55760100  | -0.72941100 |
| C | 0.89432000  | 0.27335400  | -0.14798100 |
| C | -0.20513100 | -0.57499400 | -0.81172700 |
| C | 0.08138300  | -2.03274800 | -0.89598700 |
| C | 0.56112600  | -2.63157300 | -2.15901700 |
| H | 5.15343200  | 2.88866000  | -1.59997900 |
| H | 2.34847100  | 6.11569500  | -2.10454900 |
| H | 0.82943100  | 5.00752200  | -0.49164400 |
| H | 1.27925200  | -0.21390700 | 0.76511400  |
| H | 1.73002700  | 0.44713500  | -0.84360400 |
| H | -0.34504900 | -0.17729900 | -1.83145300 |
| H | 0.15876500  | -2.60735900 | 0.02925400  |
| H | 0.02908600  | -2.22530400 | -3.03215600 |
| C | 4.01234400  | 1.44530900  | 0.12108700  |
| O | 4.70223900  | 0.77626400  | -0.63507000 |
| N | 3.85742900  | 1.15232600  | 1.42149900  |
| H | 3.21928900  | 1.71002100  | 1.98373900  |
| H | -1.73394800 | 1.88159200  | -0.68757300 |
| H | -1.73843000 | 1.72783500  | 1.08589900  |
| H | 4.53888600  | 5.03834000  | -2.66876400 |
| H | 0.47580900  | -3.72634300 | -2.17250400 |
| S | 2.34225000  | -2.20322700 | -2.49146800 |
| C | 3.20811500  | -3.57420500 | -1.62110800 |
| O | 2.79585800  | -3.01940100 | 0.74901500  |
| C | 3.67419300  | -1.89324300 | 0.65857400  |
| C | 3.73030900  | -1.26369100 | 2.03583500  |
| H | 4.18660000  | -1.97945500 | 2.73646500  |
| H | 2.70652500  | -1.06574900 | 2.39325500  |
| C | 4.53390900  | 0.03355600  | 2.05314000  |
| H | 5.49990400  | -0.11051400 | 1.54836700  |
| H | 4.22423000  | -3.18455900 | -1.47079600 |
| H | 4.73559100  | 0.32084400  | 3.09296500  |
| C | -1.51615500 | -0.90967400 | 1.33951400  |
| C | -0.85138400 | -0.40498200 | 2.46699300  |
| C | -2.16349500 | -2.14903100 | 1.46226600  |
| C | -0.83204600 | -1.11268400 | 3.67029400  |
| H | -0.32627000 | 0.55010800  | 2.42407100  |
| C | -2.14799500 | -2.85590100 | 2.66401600  |



|   |             |             |             |
|---|-------------|-------------|-------------|
| H | -2.69229100 | -2.57824300 | 0.61019200  |
| C | -1.48043300 | -2.34158400 | 3.77533900  |
| H | -0.30579200 | -0.69321100 | 4.52975500  |
| H | -2.66356000 | -3.81576100 | 2.72963700  |
| H | -1.46789500 | -2.89435300 | 4.71626300  |
| H | 3.29892300  | -1.19235200 | -0.09916500 |
| H | 4.68027400  | -2.22055100 | 0.35338900  |
| C | 2.54839500  | -3.83733000 | -0.27451200 |
| O | 1.78670000  | -4.75617300 | -0.11460100 |
| C | -2.72290400 | -0.45983800 | -0.85762000 |
| H | -2.77018500 | -1.52014300 | -1.14682000 |
| H | -2.65314000 | 0.13591400  | -1.77880200 |
| S | -4.25339900 | 0.02196500  | 0.01318700  |
| C | -5.31437100 | 0.30917600  | -1.46040100 |
| H | -5.06346200 | -0.46333800 | -2.19837400 |
| C | -6.74195700 | 0.03600400  | -1.03504800 |
| O | -7.42555600 | -0.85925700 | -1.45637900 |
| O | -7.15887900 | 0.91422700  | -0.12398300 |
| C | -8.48739200 | 0.73955500  | 0.35996600  |
| H | -9.21100000 | 0.81920500  | -0.46234600 |
| H | -8.59618600 | -0.24143300 | 0.84186700  |
| C | -5.13898700 | 1.70717400  | -2.03654800 |
| H | -5.39424600 | 2.46523300  | -1.28450300 |
| H | -4.09710500 | 1.86012400  | -2.35211700 |
| H | -5.78700700 | 1.84386200  | -2.91589700 |
| C | 3.24673900  | -4.83840100 | -2.46237900 |
| H | 3.78730300  | -5.63463900 | -1.92967200 |
| H | 2.23130700  | -5.19971000 | -2.67405000 |
| H | 3.75825900  | -4.63720600 | -3.41241200 |
| H | -8.65715200 | 1.53781000  | 1.08930800  |

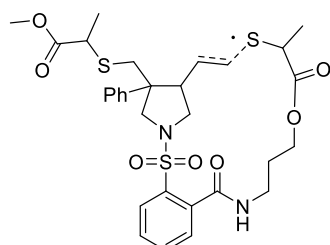

**TS7**

|   |             |             |            |
|---|-------------|-------------|------------|
| C | -1.49750000 | -0.18041200 | 0.00586700 |
| C | -1.30186100 | 1.34143200  | 0.14884000 |
| N | 0.16385900  | 1.51423000  | 0.14911200 |
| S | 0.84456500  | 2.74898800  | 0.97814900 |
| O | -0.18767300 | 3.76744200  | 1.10444500 |

|   |             |             |             |
|---|-------------|-------------|-------------|
| O | 1.47110900  | 2.28562200  | 2.22118700  |
| C | 2.13218100  | 3.36926800  | -0.12079800 |
| C | 3.37512400  | 2.76186400  | -0.41034100 |
| C | 4.19034900  | 3.40270700  | -1.35394100 |
| C | 3.82804600  | 4.59880200  | -1.96413500 |
| C | 2.60513700  | 5.18565500  | -1.65805500 |
| C | 1.75835200  | 4.56290200  | -0.74687100 |
| C | 0.88593900  | 0.27566800  | -0.14086500 |
| C | -0.20697800 | -0.58620900 | -0.78632200 |
| C | 0.10200400  | -2.04446400 | -0.79792400 |
| C | 0.17294700  | -2.77803000 | -1.94884400 |
| H | 5.13923100  | 2.92857300  | -1.60277500 |
| H | 2.29920600  | 6.12126500  | -2.12768800 |
| H | 0.79023400  | 5.00352100  | -0.51276900 |
| H | 1.28071800  | -0.19473000 | 0.77740600  |
| H | 1.71742800  | 0.44452500  | -0.84293000 |
| H | -0.34825600 | -0.23755900 | -1.82198900 |
| H | 0.35786700  | -2.51215100 | 0.15800600  |
| H | -0.19611000 | -2.36174100 | -2.88981600 |
| C | 4.01282900  | 1.47679600  | 0.11749700  |
| O | 4.72333900  | 0.82359500  | -0.63314400 |
| N | 3.84734200  | 1.17325900  | 1.41427300  |
| H | 3.19879900  | 1.72079800  | 1.97457200  |
| H | -1.74212800 | 1.86537900  | -0.71331600 |
| H | -1.75994400 | 1.73913300  | 1.06261200  |
| H | 4.50369700  | 5.06666100  | -2.68155100 |
| H | 0.32454700  | -3.85900700 | -1.90619900 |
| S | 2.46824600  | -2.20795600 | -2.51794600 |
| C | 3.29694200  | -3.58477000 | -1.63493800 |
| O | 2.84471700  | -3.00593400 | 0.72319300  |
| C | 3.71518500  | -1.87285500 | 0.64082600  |
| C | 3.75512600  | -1.24644700 | 2.02044300  |
| H | 4.21827800  | -1.95686000 | 2.72203500  |
| H | 2.72660700  | -1.06498800 | 2.37304300  |
| C | 4.53785100  | 0.06340700  | 2.04676100  |
| H | 5.50914000  | -0.06340500 | 1.54764300  |
| H | 4.31724300  | -3.21591100 | -1.45036600 |
| H | 4.72824700  | 0.35039700  | 3.08883200  |
| C | -1.53224400 | -0.89538200 | 1.35942500  |
| C | -0.87715800 | -0.37248800 | 2.48371500  |
| C | -2.17171200 | -2.13766900 | 1.49189400  |
| C | -0.86103500 | -1.06562000 | 3.69561200  |
| H | -0.35655200 | 0.58450900  | 2.43186700  |
| C | -2.15910900 | -2.82981300 | 2.70211000  |

|   |             |             |             |
|---|-------------|-------------|-------------|
| H | -2.69225400 | -2.58056500 | 0.64166500  |
| C | -1.50220800 | -2.29728100 | 3.81127000  |
| H | -0.34283100 | -0.63261200 | 4.55320100  |
| H | -2.66854100 | -3.79229100 | 2.77613900  |
| H | -1.49200500 | -2.83847600 | 4.75890400  |
| H | 3.34147300  | -1.17512200 | -0.12043500 |
| H | 4.72612500  | -2.19236000 | 0.34313100  |
| C | 2.61741000  | -3.83785700 | -0.29478800 |
| O | 1.86624000  | -4.76417200 | -0.12769500 |
| C | -2.72597300 | -0.48036900 | -0.85268500 |
| H | -2.76978100 | -1.54416600 | -1.12856300 |
| H | -2.65189900 | 0.10354600  | -1.78102100 |
| S | -4.26195800 | 0.00888700  | 0.00402900  |
| C | -5.31489300 | 0.27598900  | -1.47924300 |
| H | -5.05722300 | -0.50420800 | -2.20671500 |
| C | -6.74429900 | 0.00346000  | -1.05942900 |
| O | -7.42349600 | -0.89696500 | -1.47676600 |
| O | -7.16821900 | 0.88903300  | -0.15884600 |
| C | -8.49935100 | 0.71627900  | 0.31877700  |
| H | -9.21806900 | 0.78730000  | -0.50856500 |
| H | -8.60922500 | -0.26056300 | 0.80873300  |
| C | -5.14039800 | 1.66785200  | -2.07027600 |
| H | -5.40203900 | 2.43368700  | -1.32837300 |
| H | -4.09732500 | 1.82035000  | -2.38204900 |
| H | -5.78406200 | 1.79233300  | -2.95461200 |
| C | 3.33827800  | -4.85506900 | -2.46683600 |
| H | 3.87651400  | -5.65057900 | -1.93016400 |
| H | 2.32130100  | -5.20954700 | -2.68158400 |
| H | 3.85236100  | -4.65999300 | -3.41708600 |
| H | -8.67484800 | 1.52070200  | 1.03992000  |

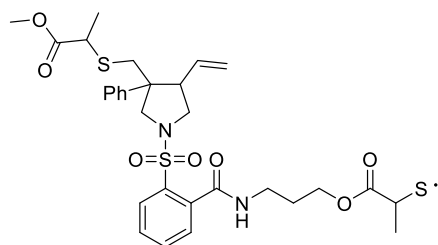

**Int7**

|   |             |             |             |
|---|-------------|-------------|-------------|
| C | -1.35422800 | -0.30017600 | 0.46237200  |
| C | -1.13701700 | -1.60594200 | -0.33412900 |
| N | 0.27661700  | -1.96241100 | -0.08726600 |
| S | 1.11463500  | -2.71870400 | -1.27715100 |
| O | 0.16806500  | -3.60822400 | -1.93507500 |

|   |             |             |             |
|---|-------------|-------------|-------------|
| O | 1.83686000  | -1.77663100 | -2.14076800 |
| C | 2.31984300  | -3.70251200 | -0.37861300 |
| C | 3.45486600  | -3.21053000 | 0.29886800  |
| C | 4.23831100  | -4.14188400 | 0.99313500  |
| C | 3.94708300  | -5.50244200 | 0.98861000  |
| C | 2.83012000  | -5.96926300 | 0.30250600  |
| C | 2.01212700  | -5.06595400 | -0.36873700 |
| C | 0.93059600  | -1.04186600 | 0.84406000  |
| C | -0.25428600 | -0.41317500 | 1.57615200  |
| C | 0.09021200  | 0.87525300  | 2.25649600  |
| C | -0.26625400 | 1.18533300  | 3.50334400  |
| H | 5.10002300  | -3.76909300 | 1.54711700  |
| H | 2.58402700  | -7.03171100 | 0.29312100  |
| H | 1.12154700  | -5.41298100 | -0.89181600 |
| H | 1.51959700  | -0.27284500 | 0.31590000  |
| H | 1.59005200  | -1.57847400 | 1.54131200  |
| H | -0.63014000 | -1.13537100 | 2.31824800  |
| H | 0.65375800  | 1.60271200  | 1.66039400  |
| H | -0.83258900 | 0.48458300  | 4.12514900  |
| C | 3.96630100  | -1.78171600 | 0.45332200  |
| O | 4.37795800  | -1.41765700 | 1.54454000  |
| N | 4.03646600  | -1.01718900 | -0.64858300 |
| H | 3.58655200  | -1.33390700 | -1.50303200 |
| H | -1.79139200 | -2.40343000 | 0.04875500  |
| H | -1.34702500 | -1.47954700 | -1.40452400 |
| H | 4.59368800  | -6.19560400 | 1.52859500  |
| H | -0.00156300 | 2.15029000  | 3.94389500  |
| S | 0.47455400  | 4.42997400  | 1.33089300  |
| C | 1.73185600  | 5.33815200  | 0.38839700  |
| O | 3.45559400  | 3.73482500  | 0.49809200  |
| C | 4.32316100  | 2.73422900  | -0.04037800 |
| C | 3.63802200  | 1.38121800  | -0.09374700 |
| H | 2.75729300  | 1.43691200  | -0.75495900 |
| H | 3.29276300  | 1.10870700  | 0.91571300  |
| C | 4.60573200  | 0.31487200  | -0.60250300 |
| H | 5.48966700  | 0.28449400  | 0.05146600  |
| H | 2.34258500  | 5.79786500  | 1.18571400  |
| H | 4.94521100  | 0.56563400  | -1.61692400 |
| C | -1.11589700 | 0.94920900  | -0.38901700 |
| C | -0.15528600 | 0.95132800  | -1.41342000 |
| C | -1.79609500 | 2.14678900  | -0.12755200 |
| C | 0.12422000  | 2.10921600  | -2.13866600 |
| H | 0.39381200  | 0.04271100  | -1.66432700 |
| C | -1.53351500 | 3.30223700  | -0.86854800 |

|   |             |             |             |
|---|-------------|-------------|-------------|
| H | -2.55107600 | 2.19393200  | 0.65807900  |
| C | -0.56582900 | 3.29095700  | -1.87272400 |
| H | 0.88570500  | 2.08395200  | -2.91984400 |
| H | -2.08898400 | 4.21692900  | -0.65162200 |
| H | -0.35519800 | 4.19127700  | -2.45174400 |
| H | 5.18768600  | 2.70545400  | 0.63557100  |
| H | 4.66312700  | 3.04515800  | -1.03814200 |
| C | 2.63135600  | 4.35767600  | -0.34334000 |
| O | 2.60892700  | 4.17343400  | -1.53191800 |
| C | -2.72977200 | -0.31120800 | 1.12715400  |
| H | -2.83453200 | 0.52215700  | 1.83736100  |
| H | -2.83241900 | -1.24787800 | 1.69269900  |
| S | -4.07327100 | -0.25677800 | -0.10911800 |
| C | -5.37574700 | -1.08235100 | 0.89211600  |
| H | -5.26993500 | -0.72238700 | 1.92340600  |
| C | -6.70848400 | -0.55794500 | 0.40008300  |
| O | -7.46465400 | 0.11438400  | 1.05013800  |
| O | -6.94923500 | -0.93050000 | -0.85622100 |
| C | -8.17421700 | -0.47721500 | -1.42512000 |
| H | -9.02986000 | -0.85691500 | -0.85075700 |
| H | -8.20924800 | 0.62045800  | -1.44055900 |
| C | -5.28660400 | -2.60014800 | 0.81971000  |
| H | -5.39587300 | -2.94028700 | -0.21844900 |
| H | -4.31461900 | -2.94269400 | 1.20264700  |
| H | -6.07741600 | -3.06057200 | 1.43167000  |
| C | 1.15803800  | 6.40337800  | -0.52948900 |
| H | 1.97138500  | 6.95200300  | -1.02608200 |
| H | 0.52576400  | 5.94958000  | -1.30377100 |
| H | 0.55486300  | 7.11293700  | 0.05105600  |
| H | -8.20329400 | -0.86889400 | -2.44670100 |

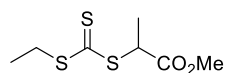

**CTA**

|   |             |             |             |
|---|-------------|-------------|-------------|
| H | -4.46350200 | -2.62450500 | -0.02720200 |
| C | -4.26517200 | -1.58472900 | 0.27044100  |
| H | -2.35185600 | -1.44937400 | -0.75769400 |
| H | -2.24749400 | -2.03925900 | 0.92553600  |
| H | -4.78366900 | -0.91595400 | -0.43015900 |
| C | -2.76495500 | -1.34079700 | 0.25426200  |
| H | -4.68727800 | -1.43586400 | 1.27478500  |
| S | -1.18012400 | 2.70637400  | -0.40624900 |
| S | -2.42571800 | 0.37176600  | 0.81534000  |

|   |             |             |             |
|---|-------------|-------------|-------------|
| C | -1.26432400 | 1.07639800  | -0.28109400 |
| O | 1.34793600  | 0.14001100  | 1.69709400  |
| H | -0.28920000 | -1.44266600 | 0.59355900  |
| S | -0.22940400 | 0.06883400  | -1.30842900 |
| C | 1.55106800  | -0.41242200 | 0.64776400  |
| C | 0.48220600  | -1.15770700 | -0.12882500 |
| H | 3.98254400  | -0.08138800 | 1.64471700  |
| C | 3.76813400  | 0.33005400  | 0.64941800  |
| O | 2.72127300  | -0.40449400 | 0.01949300  |
| C | 0.98288800  | -2.35699200 | -0.91476300 |
| H | 0.13954500  | -2.87660200 | -1.38903100 |
| H | 1.48731300  | -3.05684400 | -0.23355900 |
| H | 3.48810000  | 1.38756000  | 0.74791900  |
| H | 1.70012900  | -2.05437100 | -1.68953300 |
| H | 4.64559400  | 0.23072000  | 0.00296600  |

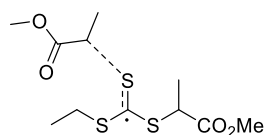

### TS8

|   |             |             |             |
|---|-------------|-------------|-------------|
| H | -2.04239500 | 3.89254600  | 0.64951800  |
| C | -2.07056800 | 2.94111100  | 0.09774800  |
| H | -0.12979800 | 2.26563100  | 0.79964600  |
| H | -0.06667100 | 3.19226400  | -0.72098800 |
| H | -2.63349400 | 2.20461100  | 0.68809900  |
| C | -0.65072800 | 2.45915400  | -0.14750700 |
| H | -2.60508300 | 3.11403200  | -0.84759300 |
| S | -0.39766700 | -1.88957100 | -0.27839400 |
| S | -0.66660400 | 0.89759800  | -1.10809900 |
| C | 0.07315300  | -0.32202400 | -0.09907100 |
| O | 2.96755100  | 0.14110600  | -1.81906700 |
| H | 1.84464400  | 1.89272000  | -0.37211800 |
| S | 1.25947900  | 0.09107500  | 1.14563300  |
| C | 3.24439400  | 0.33616500  | -0.66463100 |
| C | 2.42666800  | 1.21415900  | 0.26168100  |
| H | 5.49062200  | -0.60038100 | -1.69833100 |
| C | 5.06754300  | -1.11918800 | -0.82791100 |
| O | 4.27899500  | -0.22545400 | -0.04687100 |
| C | 3.23960300  | 1.97533000  | 1.29524600  |
| H | 2.58502800  | 2.63471500  | 1.88092300  |
| H | 3.99367900  | 2.59306200  | 0.78722600  |
| H | 4.45859100  | -1.96569500 | -1.17315500 |

|   |             |             |             |
|---|-------------|-------------|-------------|
| H | 3.76000900  | 1.28906600  | 1.97674300  |
| C | -4.45989400 | 0.35443600  | -0.74064200 |
| O | -3.63785800 | -0.16093800 | 0.29415800  |
| C | -2.46718100 | -1.91963500 | 1.28656700  |
| H | -2.39462700 | -3.00140400 | 1.40716800  |
| C | -3.41626200 | -1.48678900 | 0.26131100  |
| H | -5.43065800 | -0.15937600 | -0.76237200 |
| H | -3.97095600 | 0.23352000  | -1.71858500 |
| O | -3.95127700 | -2.21995300 | -0.54078600 |
| C | -1.99213000 | -1.01233800 | 2.36085200  |
| H | -2.78045500 | -0.87243400 | 3.12299900  |
| H | -1.10926400 | -1.42644800 | 2.86717000  |
| H | -1.75271500 | -0.01458900 | 1.96217200  |
| H | 5.86992500  | -1.47416200 | -0.17354000 |
| H | -4.60641700 | 1.41824800  | -0.52625300 |

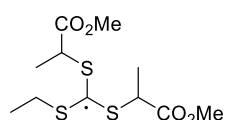

**Int8**

|   |             |             |             |
|---|-------------|-------------|-------------|
| H | -2.43313900 | 4.17184000  | -0.12407300 |
| C | -2.18599100 | 3.34839700  | -0.80897000 |
| H | -1.90521300 | 1.87247400  | 0.77854700  |
| H | -0.42666700 | 2.75216800  | 0.31096500  |
| H | -3.12765400 | 2.92432700  | -1.18592600 |
| C | -1.35858800 | 2.31144300  | -0.06885200 |
| H | -1.62891600 | 3.76895500  | -1.65868600 |
| S | -0.22612800 | -1.88308000 | -0.62061800 |
| S | -0.95060600 | 0.93758600  | -1.20285400 |
| C | -0.10455600 | -0.19111100 | -0.19017100 |
| O | 2.81288900  | 0.18137000  | -1.66457400 |
| H | 1.58588700  | 2.03962800  | -0.43211700 |
| S | 0.91184100  | 0.32000400  | 1.13004100  |
| C | 3.03295900  | 0.49986500  | -0.52446800 |
| C | 2.14284100  | 1.41843400  | 0.28133600  |
| H | 5.34389800  | -0.45990300 | -1.38148600 |
| C | 4.90375200  | -0.90185300 | -0.47758600 |
| O | 4.06234000  | 0.03804300  | 0.18276600  |
| C | 2.85516600  | 2.25347600  | 1.32949200  |
| H | 2.14001400  | 2.91694700  | 1.83432800  |
| H | 3.62815400  | 2.87237300  | 0.85190400  |
| H | 4.33266600  | -1.79793600 | -0.75694500 |
| H | 3.34156700  | 1.61607200  | 2.08023500  |

|   |             |             |             |
|---|-------------|-------------|-------------|
| C | -4.26249600 | 0.31149800  | 0.02729800  |
| O | -3.24301800 | -0.55372800 | 0.51364700  |
| C | -1.77172500 | -2.39095200 | 0.27336900  |
| H | -1.91631400 | -3.42228600 | -0.07797300 |
| C | -2.93461000 | -1.58609600 | -0.27185300 |
| H | -5.21301100 | -0.23010200 | -0.07409500 |
| H | -3.97686100 | 0.71928400  | -0.95259700 |
| O | -3.51207300 | -1.83459400 | -1.29735600 |
| C | -1.60286500 | -2.32941900 | 1.77900900  |
| H | -2.52075400 | -2.67151900 | 2.28018400  |
| H | -0.77079200 | -2.97447100 | 2.09146500  |
| H | -1.40083100 | -1.30031900 | 2.10807900  |
| H | 5.69178100  | -1.16501000 | 0.23521200  |
| H | -4.36711100 | 1.11665200  | 0.76231900  |
